# Supplementary material for: Molecular Events Controlling Cessation of Trunk Neural Crest Migration and Onset of Differentiation
Source: Front Cell Dev Biol. 2020 Apr 2;8:199. doi: 10.3389/fcell.2020.00199 (PMC7147452; doi:10.3389/fcell.2020.00199)
Supplement: TABLE S1 — GO genes from HH16/HH19 macroarray comparison. [file Table_1.XLSX]

## Sheet: Supp Table 1-GO
# of genes	bit score		Notes/GO terms
		A. Cell cycle/mitosis
18	>200	cyclin B2, B3	cell cycle proteins
		CDC23	Cell division cycle protein 23 homolog; progression through cell cycle
		Cdc2	cell division cycle associated 2; progression through cell cycle
		MCM5	DNA replication licensing factor MCM5; regulation of progression through cell cycle
		retinoblastoma 1	transcription factor complex; cell cycle check point
		mitotic spindle coiled-coil related protein	spindle organization and biogenesis
		proliferating cell nuclear antigen (PCNA)	S-phase
		retinoblastoma-like protein 1
		cdc8	cell division cycle 8
		CAD protein	nucleic acid synthesis
		Disc large homolog 7
	>200	BUB1 budding uninhibited by benzimidazoles 1 homolog beta [Gallus gallus];BUB1B, BUBR1, MAD3L: Mitotic checkpoint serine/threonine-protein kinase BUB1 beta	Mitotic checkpoint serine/threonine-protein kinase
		GLYCINAMIDE RIBONUCLEOTIDE SYNTHETASE-AMINOIMIDAZOLE RIBONUCLEOTIDE SYNTHETASE-GLYCINAMIDE RIBONUCLEOTIDE TRANSFORMYLASE [Gallus gallus]	nucleic acid synthesis
		IMP dehydrogenase (EC 1.1.1.205) - mouse; Inosine-5'-monophosphate dehydrogenase 2	nucleic acid synthesis
		AIR carboxylase domain [Gallus gallus];PAICS, ADE2, AIRC, PAIS: Multifunctional protein ADE2 [Includes: Phosphoribosylaminoimidazole-succinocarboxamide synthase	nucleic acid synthesis
		guanine monophosphate reductase	nucleic acid synthesis
		Cullin homolog 3 (CUL-3)	transition of mitotic cell cycle
		Nucleolar phosphoprotein p130	nucleolus; protein binding; cell cycle
		B. Chromatin
14		DNA methyltransferase 3A, 3B	DNA binding; DNA methylation;methylation-dependent chromatin silencing
		hmg- 1c, 2,a, 14a, 17	Non-histone chromosomal protein;establishment and/or maintenance of chromatin architecture;regulation of transcription, DNA-dependent
		histone deacetylase 2, 3	histone deacetylase activity; transcription factor binding; chromatin modification
		histone H3-K4 methyltransferase	histone-lysine N-methyltransferase activity; chromatin modification
		SMARCA5/SNF2H	SWI/SNF-related matrix-associated actin-dependent regulator of chromatin subfamily A member 5; histone binding; helicase activity; chromatin remodeling; transcription initiation
	e3d10	SMARCD1	BAF60A: SWI/SNF-related matrix-associated actin-dependent regulator of chromatin subfamily D member 1; transcription coactivator activiity; chromatin remodeling complex; chromatin-mediated maintenance of transcription
		SMARCA4	SWI/SNF related, matrix associated, actin dependent regulator of chromatin, subfamily a, member 4; helicase activity;central nervous system development; neural crest cell development
	g1d4	CBX3: Chromobox protein homolog 3	chromatin binding
		Set1/Ash2 histone methyltransferase complex subunit ASH2	histone methyltransferase complex; transcription regulator activity
		C. Cytoskeleton and binding proteins
16	>200	vimentin	cytoskeleton; type III intermediate filament; cell motility
		nonmuscle myosin heavy chain	myosin-10; actin filament-based movement; growth cone; neuron migration; plasma membrane repair; substrate-bound cell migration, cell extension
		actin-capping protein beta chain	actin dynamics; cell migration
		tubulin, alpha 1	GTP binding; structural molecule activity; microtubule-based movement
		beta-5 tubulin	cytoskeleton;microtubule-based movement
		neurofilament medium subunit	neuronal intermediate filament; axon outgrowth
	>200	stathmin	tubulin binding; microtubule depolymerization; mitotic spindle organization and biogenesis
	>200	thymosin beta-4	protein; regulation of cell migration
		Tubulin beta-4 chain (Beta-tubulin class-III)	microtubule cytoskeleton
	>200	Dynein light chain 2A, cytoplasmic	cytoplasmic dyneim complex; microtublue motor activity; microtubule-based movement
		EB1	MAPRE1: Microtubule-associated protein RP/EB family member 1; cortical microtubule cytoskeleton; microtubule plus-end binding; negative regulator of microtubule polymerization
	156	calponin 3	calponin, acidic; actin binding; calmodulin binding; tropomyosin binding; troponin C binding
		fascin-1	actin cytoskeleton; filopodia;actin cytoskeleton organization and biogenesis; actin filament bundle formation; cell proliferation
		actin-related protein 6	ARF6; membrane; receptor activity; transporter activity
		radixin	actin cytoskeleton; cytoskeletal anchoring; apical part of cell; filopodium; lamellipodium
		Moesin	Membrane-organizing extension spike protein; cytoskeleton; cell motility
		KIF2	Kinesin-like protein KIF2; cytoskeleton; microtubule associated complex; ATP binding; motor activity
		DLC1	Dynein light chain 1, cytoplasmic; dynein light chain LC8-type 1; cytoplasmic dynein complex; actin cytoskeleton organization and biogenesis; microtubule-based movement; regulation of cell shape
		D. Extracellular matrix and cell adhesion molecules
22		Fibronectin	extracellular matrix; collagen binding;heparin binding; cell adhesion; cell migration
		B-cadherin	cadherin-1; cell-cell adherens junction;homophilic cell adhesion; beta-catenin binding; calcium ion binding
	100	Collagen type I, alpha 2	Col1a2; extracellular matrix; transmembrane receptor protein tyrosine kinase signaling pathway
		Collagen type IV, alpha 1	Collagen type IV;basement membrane; extracellular space
		Collagen type IV, alpha 2	Collagen type IV;extracellular matrix organization and biogenesis; negative regulation of angiogenesis
		neuron-glia cell adhesion molecule (Ng-CAM)	cell adhesion molecule binding
		Glypican-4	extracellular space;cell proliferation;anatomical structure morphogenesis
		latent transforming growth factor beta binding protein 1	proteinaceous extracellular matrix; growth factor binding;TGF beta receptor signaling pathway
		Laminin beta 1	basement membrane;laminin-10 complex;proteinaceous extracellular matrix;cell adhesion;neurite development;postive regulator of cell migration
		Catenin alpha-1	cadherin associated protein;adherens junction;zonula adherens;vinculin binding;apical junction assembly;cell adhesion;establishment and/or maintenance of cell polarity; negative regulation of neuroblast proliferation
	123	Catenin delta 1	lamellipodium;cell-cell adhesion
	316	Microfibrillar-associated protein 1	MFAP1; extracellular matrix structural constituent;microfibril
	104	thrombomucin	PODXL, PCLP, PCLP1: Podocalyxin-like protein 1 precursor;ATP binding;protein kinase activity;leukocyte migration
		fibrillin 1	basement membrane;extracellular space;microfibril;calcum ion binding;
		claudin-1	tight junction; Ca++-independent cell-cell adhesion; cell adhesion
		Opticin	proteinaceous extracellular matrix;glycosaminoglycan binding
		proline arginine-rich end leucine-rich repeat protein	extracellular matrix structural constituent
		Afadin	MLLT4, AF6; intercellular junction;cell adhesion; adherens junction; cell-cell signaling;neuropeptide signaling pathway
		Pinin	intercellular junction;desmosome; cell adhesion
		thrombospondin 4	extracellular space;proteinaceous extracellular matrix; calcium ion binding; heparin binding;cell adhesion;substrate-bound cell migration, cell extension
		Pinch-1	LIM and senescent cell antigen-like-containing domain protein 1; focal adhesion; cell-cell adhesion; cell-matrix adhesion; establishment and/or maintenance of cell polarity
		Mucin-5	Mucin-5AC precursor (Fragments); extracellular matrix structural constituent; cell adhesion; fibril organization and biogenesis
16		E. protein/ras/rho
		rab2	GTPase activity; ER to Golgi vesicle-mediated transport
		Rab5c	Ras-related protein Rab5c;GTPase acitivity
		Rab11a	Ras-related protein Rab-11A;GTPase acitivity; plasma membrane to endosome transport
		Rab11b	Ras-related protein Rab-11B; cytoplasmic membrane-bound vesicle;GTPase activity
		GAP SH3-domain binding protein 1 (G3BP-1)	Ras-GTPase-activating protein
		SLIT-ROBO Rho GTPase-activating protein 1	Rho GTPase activator activity; cell migration
		DOCK1	Dedicator of cytokinesis protein 1; small GTPase mediated signal transduction; integrin-mediated signaling pathway; cell migration
		Ran	GTPase activity;mitotic spindle organization and biogenesis
		RAN binding protein 1	GDP-dissociation inhibitor activity; Ran GTPase binding;positive regulation of mitotic centrosome separation;spindle organization and biogenesis
		RhoA GTPase	GTPase activity;actin cytoskeleton organization and biogenesis;cell adhesion; cell morphogenesis;cell differentiation;cell-matrix adhesion;integrinmediated signaling pathway;negative regulation of neuron apoptosis
		Rab GDP dissociation inhibitor beta	Golgi apparatus; protein transport; small GTPase mediated signal transduction
		Rho GDP-dissociation inhibitor 2	cytoskeleton;actin cytoskeleton organization and biogenesis; cell motility;Rho protein signal transduction
		K-Ras	GTPase KRas precursor;GTPase activity;regulation of progression through cell cycle;actin cytoskeleton organization and biogenesis;positive regulation of Rac protein signal transduction;negative regulation of neuronal apoptosis
	144	RalA-binding protein 1	RALBP1, RLIP1, RLIP76: RalA-binding protein 1;Rac GTPase activator activity;ATPase activity; Ral GTPase activity;chemotaxis;positive regulation of Cdc42 GTPase activity
		Nucleolar GTP-binding protein 2	GTPase activity;
		Rab GTPase-activating protein 1	microtubule associated complex;GTPase activator activity;tubulin binding;cell cycle
		RALGDS, RGF	Ral guanine nucleotide dissociation stimulator;small GTPase regulator activity; lipid binding; protein binding; transport
16		F. Secreted Signals/signal production
		macrophage migration inhibitory factor	cytokine activity;DNA damage response, signal transduction by p53 class mediator;regulation of cell proliferation
		FGFR1	receptor for FGFs;heparin binding;cell growth;FGF signaling pathway;MAPKKK cascade
		Interferon-alpha/beta receptor alpha	receptor for interferon;JAK-STAT signaling
		neuropilin 2	receptor for VEGF and semaphorin;axon guidance; neural crest migration
		collapsin response mediator protein	dihydropyrimidinase activity; nervous system development;nucleobase, nucleoside, nucleotide and nucleic acid metabolic process;axon guidance
	354	Wnt inhibitory factor 1	extracelluar space;Wnt-protein binding;negative regulation of Wnt receptor signaling pathway
		CXCL12	stromal cell-derived factor 1;chemokine activity;cell adhesion;chemotaxis
		Wnt11	cell-cell signaling;organ morphogenesis
		p75 NGFR	receptor for neurotrophins;axon guidance; neural development
		Latent-transforming growth factor beta-binding protein	growth factor binding;proteinaceous extracellular matrix; transforming growth factor beta receptor activity
		VEGF receptor	transmembrane receptor protein tyrosine kinase signaling pathway; cell migration
		Wnt4	cell-cell signaling;organ morphogenesis
		insulin-like growth factor 2 receptor	insulin-like growth factor binding; receptor-mediated endocytosis; trans-Golgi network transport vesicle;
		Lymphatic vessel endothelial hyaluronic acid receptor 1	hyaluronic acid binding; glycosaminoglycan catabolic process; cell motility; cell-matrix adhesion
		adrenergic receptor alpha 2C	G-protein coupled receptor;activation of MAPK activity; cell-cell signaling
		neural epidermal growth factor-like 2 (NELL2)	EGF-like repeats; cell adhesion;neural development
9		G. RNA binding proteins
		cold-inducible RNA-binding protein	RNA binding; response to cold
		cold shock domain containing E1	RNA binding; peroxidase activity
		HuD	mRNA 3'UTR binding; mRNA processing;neuronal differentiation
		Rbm39	RNA binding protein 39; transcription coactivator activity
		Rbm18	RNA binding motif protein 18
		Staufen2	double-stranded RNA binding;germ cell migration
		Pum2	Pumilio homolog 2; RNA binding
	210g20	Poly(rC)-binding protein 4	RNA binding;cell cycle arrest;DNA damage response
		Qkl-1	Protein quaking; long-chain fatty acid biosynthetic process RNA binding; axon ensheathment; myelination
20		H. Downstream/intracellular signaling
		protein tyrosine phosphatase CRYP alpha	tyrosine phosphatase activity
		protein phosphatase 1	phosphatase activity
		c-Abl	tyrosine protein kinase
		Tyrosine protein kinase-like 7	tyrosine kinase activity; neural tube development
		AKAP	a-kinase anchoring protein;guanine nucleotide exchange factor
		MAP kinase phosphatase 6	protein phosphatase
		14-3-3 protein beta/alpha	protein kinase C inhibitor protein-1
		FK506 binding protein 14
		NOK kinase	tyrosine protein-kinase STYK1
		serine/threonine protein kinase 4	protein kinase activity
		Diacylglycerol kinase
		Glycogen synthase kinase 3 beta	GSK beta; downstream of Wnt signaling
		beta catenin 1	Wnt signaling
		MAP kinase 8 interacting protein 3	c-jun amino-terminal kinase interacting protein 3
		cellular retinoic acid binding protein 2	retinoic acid signaling
		inhibitor of protein phosphatase 2A	protein phosphatase type 2A regulator;nucleocytoplasmic transport
		sphingosine-1-phosphate lyase	lysophospholipid signaling; cell growth and proliferation
		calreticulin	calcium binding
		WASF2	Wiskott-Aldrich syndrome protein family member 2; actin cytoskeleton organization and biogenesis; G-protein signaling, coupled to cAMP nucleotide second messenger
		lipin2	phosphatidate phosphatase activity
18		I. Transcription factors/regulators
		Sox11	SRY-box; nervous system development
		TFAP2 alpha	transcription factor AP-2 alpha;regulation of transcription;anterior neuropore closure;ectoderm development
		Hoxc9	homeobox protein
		Transcription factor BTF3	transcription from RNA polymerase II promoter
		Pax3	paired box gene 3; Waardenburg syndrome 1
		E12	helix-loop-helix protein; transcription factor E2 alpha
		Ybx1	Y box protein 1;Nuclease sensitive element-binding protein 1;single-stranded DNA binding;regulation of transcription
		Tubby-related protein 3	regulation of transcription;phosphotidylinositol-4,5-bisphosphate binding;G protein coupled receptor signaling
		Foxa2	Forkhead box A2; myelin formation in the central nervous system;oligodendrocyte cell fate commitment; ventral midline development
		Sal-like 4	zinc finger protein; transcription factor
		metastasis associated 1	regulation of transcription, DNA-dependent
		TGIF2	homeobox protein TGIF2; transcription activity
		Jumonji domain containing 2B	regulation of transcription;histone demethlation activity?
		thyroid hormone receptor interactor 4	activating signal cointegrator 1; transcription coactivator activity
		nuclear receptor 1h4	nuclear receptor; transcription factor activity
		Interleukin enhancer-binding factor 3	double-stranded RNA binding; transcription activity
		Prohibitin	mitochondria localization; transcriptional regulation; regulation of cell cycle and apoptosis
		similar to Zinc finger homeobox protein 1b (Smad interacting protein 1) (SMADIP1)
10		J. Cell Death
		Programmed cell death 5	induction of apoptosis
		Apoptosis-stimulating of p53 protein 2	NF kappaB binding;SH3/SH2 adaptor activity; induction of apoptosis
	185	Bcl-2-associated transcription factor 1	transcription repressor activity; induction of apoptosis
		BCL2/adenovirus E1B 19 kDa protein-interacting protein 3	mitochondrial outer membrane;neuronal apoptosis
		Poly(ADP-ribose) polymerase-1	protein amino acid ADP-ribosylation; DNA repair; cell death
	192	annexin 4	calcium-dependent phospholipid binding; phospholipase inhibitor activity; anti-apoptosis
		Bid	BH3 interacting domain death agonist;mitochodrion; release of cytochrome C; induction of apoptosis via death domain receptors
		BTG-1	negative regulation of cell proliferation; regulation of apoptosis
		TPT1	Translationally-controlled tumor protein; calcium ion binding; colocalizes with tubulin complex; regulation of apoptosis;
		14-3-3 protein	tyrosine 3-monooxygenase/tryptophan 5-monooxygenase activation protein, theta polypeptide; small GTPase mediated signal transduction; protein kinase C inhibitor activity; regulation of apoptosis
11		K. Nucleocytoplasmic export
		Matrin-3	nuclear inner membrane; protein binding
		Nucleophosmin	centrosome; NFkappa B binding;negative regulation of cell proliferation
		Nuclear transport factor 2	nuclear pore; protein binding; transporter activity
		heterogeneous nuclear ribonucleoprotein complex	DNA binding; protein binding; RNA binding
		NUP205	nuclear pore; nucleocytoplasmic transport; protein import into nucleus, docking
		Polypyrimidine tract-binding protein 1	heterogeneous nuclear ribonucleoprotein complex; nucleolus; nucleoplasm; protein binding
		ASNA1	Arsenical pump-driving ATPase; cytoplasm; nucleolus;transporter activity
		SET protein	nucleosome assembly and disassembly;nucleocytoplasmic transport
		Importin beta 3	RANBP5; KPNB3; nuclear localization sequence binding;NLS-bearing substrate import into nucleus; Ran GTPase binding
		Nucleoporin GLE1	nuclear pore;RNA export mediator
		DEAD box protein 19	ATP-dependent RNA helicase DDX19; mRNA export from nucleus
		Importin 9	RANBP9; Ran GTPase binding; protein import into nucleus;ribosomal protein import into nucleus;ribosome genesis and assembly
19		L. Transcription-coupled processes/RNA processing
		splicing factor 3B2	spliceosome; nuclear mRNA splicing
	195	Splicing factor, arginine/serine-rich 7	RNA splicing
		Splicing factor, arginine/serine-rich 3	RNA splicing
	193	Splicing factor, arginine/serine-rich 6	mRNA splice site selection
		Heterogeneous nuclear ribonucleoprotein Q	RNA binding; RNA splicing
		Heterogeneous nuclear ribonucleoprotein A1	heterogeneous nuclear ribonucleoprotein complex; spliceosome
		Pescadillo homolog 1	ribosome biogenesis and assembly
		DEAD box protein 54	RNA processing
		UTP6	small subunit (SSU) processome component; RNA processing
		WDR57	WD repeat-containing protein 57; small nucleolar ribonucleoprotein complex; RNA splicing
		transformer-2 protein	nuclear mRNA splicing, via spliceosome
		Polypyrimidine tract-binding protein 1	heterogeneous nuclear ribonucleoprotein complex; RNA splicing
		Pre-mRNA splicing factor 18	RNA splicing
		Gemin3	Probable ATP-dependent RNA helicase DDX20; assembly of spliceosomal tri-snRNP
		WW domain binding protein 11	protein phosphatase type 1 regulator activity; RNA splicing
	176	NONO	Non-POU domain-containing octamer-binding protein; RNA splicing
		dyskeratosis congenita 1	dyskerin homolog; a component of H/ACA small nucleolar ribonucleoprotein particles; RNA processing
		POP2	CCR4-NOT transcription complex subunit; regulation of transcription; negative regulation of cell proliferation
		Structure specific recognition protein 1	FACT complex; regulation of chromatin assembly or disassembly
21		M. Protein transport/folding
		Hsp90	heat shock protein 90; protein homodimerization activity; nitric-oxide synthase regulator activity;tetratricopeptide repeat (TPR) domain binding; protein refolding
		Hsp70	heat shock protein 70; ATPase activity-coupled;protein folding; response to unfolded protein; chaperone cofactor-dependent protein folding
		Hsp105	heat shock protein 105; chaperone cofactor-dependent protein folding;response to unfolded protein
		Sec23B	protein transport protein Sec23-related protein; vesicle-mediated transport
		chaperonin containing TCP1, subunit 6A (zeta 1)	chaperonin-containing T-complex; protein transporter activity;unfolded protein binding;chaperone-mediated protein complex assembly
		chaperonin containing TCP1, subunit 2 (beta)	chaperonin-containing T-complex; unfolded protein binding
		SAMM-50	Sorting and assembly machinery component 50 homolog
		COPB2	Coatomer subunit beta;COPI vesicle coat;intra-Golgi vesicle-mediated transport;retrograde vesicle-mediated transport, Golgi to ER
		N-ethylmaleimide sensitive fusion protein	Vesicle-fusing ATPase;syntaxin binding
		Exportin 5	RANBP21; Ran binding protein 21; protein transporter activity; tRNA binding; protein export from nucleus
		Importin 7	RANBP7; Ran binding protein 7; Ran GTPase binding; small GTPasae regulator activity; transporter activity; protein import into nucleus
		Golgi-specific brefeldin A-resistance guanine nucleotide exchange factor 1	ARF guanyl-nucleotide exchange factor activity; protein binding;retrograde vesicle-mediated transport, Golgi to ER
		adaptor protein complex AP-1, beta 1	protein binding; transporter activity;intracellular protein transport; vesicle-mediated transport
		ring finger protein 34 isoform 1	RING finger protein RIFF;ring finger and FYVE like domain containing protein; cytoplasmic membrane-bound vesicle; intracellular protein-transport
		Cation-independent mannose-6-phosphate receptor precursor/IGF2R	trans-Golgi network transport vesicle; insulin-like growth factor receptor activity;receptor-mediated endocytosis
		peroxisome biogenesis factor 1	peroxisome; ATPase activity-coupled;protein complex binding; microtubule-based peroxisome localization; protein import into peroxisome matrix
		vacuolar protein sorting 24	phagocytosis; engulfment;late endosome to vacuole transport;
	105	GOLGA3	Golgin subfamily A member 3; Golgi transport complex; intra-Golgi vesicle-mediated transport
		Trafficking kinesin-binding protein 2	neurotransmitter transport; protein amino acid O-linked glycosylation; protein targeting; kinesin-associated mitochondrial adaptor activity
		adaptor related protein complex (AP)-3 delta	trans-Golgi network; intracellular protein transport; vesicle-mediated transport; antigen processing and presentation
		Golgi SNAP receptor complex member 2	transporter activity; ER to Golgi vesicle-mediated transport; membrane fusion
26		N. Protein production/degradation
		lunatic fringe	O-fucosylpeptide 3-beta-N-acetylglucosaminyltransferase; Notch signaling; organ morphogenesis
		eIF4F	eukaryotic translation initiation factor 4F complex; RNA cap binding
		Proteasome 26S non-ATPase subunit 2	proteasome regulatory particle; protein binding
		26S protease regulatory subunit 7	ATPase activity; proteolysis
		Proteasome subunit alpha type 6 (Proteasome iota chain)	RNA binding; ubiquitin-dependent protein catabloic process
		mindbomb homolog 1	ubiquitin ligase mind bomb; negative regulation of neuron differentiation; Notch signaling pathway; positive regulation of endocytosis; ubiquitin ligase complex
		S-phase kinase-associated protein 1A isoform b	organ of Corti protein 2; transcription elongation factor B (SIII), polypeptide 1-like; RNA polymerase II elongation factor-like protein OCP2; cyclin A/CDK2-associated p19; SCF ubiquitin ligase complex; ubiquitin ligase activity
		ubiquitin-like, containing PHD and RING finger domains 1	transporter activity; cell proliferation; regulation of transcription
		ubiquitin specific protease 42	Dub1; deubiquitinating enzyme 1; ubiquitin-specific protease activity; protein de-ubiquitination
		ubiquitin specific protease 3	ubiquitin specific peptidase 3; cysteine-type endopeptidase activity; hydrolase activity; ubiquitin thiolesterase activity; ubiquitin-dependent protein catabolic process
		ubiquitin-protein ligase	ubiquitin ligase complex; protein modificaiton process; ubiquitin-dependent protein catabolic process
		hyd protein	E3 ubiquitin-protein ligase EDD1; ubiquitin-protein ligase activity; cell proliferation
		STIP1	Stress-induced-phosphoprotein 1; Golgoi apparatus; response to stress
		eukaryotic translation termination factor 1	Eukaryotic peptide chain release factor subunit 1; ribosome binding; RNA binding; regulaiton of translational termination
		E3 ubiquitin-protein ligase TRIM33	tripartite motif protein 33; zinc ion binding; negative regulation of transcription
		Poly(A) binding protein-interacting protein 2	PABP-interacting protein 2; translation repressor activity; negative regulation of translational initiation
		Ubiquitin-63E	ATP-dependent proteolysis; establishment and/or maintenance of chromatin architecture; phagocytosis, engulfment; protein modification; ribosome biogenesis and assembly; ubiquitin-dependent protein catabolic process
		F-box only protein 22	ubiquitin-protein ligase activity; protein modification process
		protein glycosyltransferase	Ribophorin I; protein amino acid N-linked glycosylation via asparagine
		alpha-1,3(6)-mannosylglycoprotein beta-1,6-N-acetyl-glucosaminyltransferase	protein amino acid N-linked glycosylation
		Protein disulfide isomerase A4	protein secretion; protein transport; endoplasmic reticulum; calcium ion binding
		N-acetylglucosamine-phosphate mutase)	Phosphoglucomutase 3; glucosamine metabolic process
		sulfotransferase	Sulfotransferase 1A1; estrone sulfotransferase activity
		Alanyl-tRNA synthetase	alanyl-tRNA aminoacylation; tRNA processing;
6		O. Mitochondria/metabolism
		ornithine decarboxylase antizyme	polyamine metabolic process; ornithine decarboxylase inhibitor activity
		ALDH2	Aldehyde dehydrogenase, mitochondrial precursor (ALDH class 2); alcohol metabolic process; carbohydrate metabolism
		malate dehydrogenase 2	Malate dehydrogenase 2 NAD (mitochondrial);
		alcohol dehydrogenase 5	Alcohol dehydrogenase class III, fatty acid binding; retinoid metabolic process
		NADH dehydrogenase	NADH dehydrogenase [ubiquinone] flavoprotein 1; mitochondrial electron transport, NADH to ubiquinone; mitochondrial respiratory chain complex I
		Neurolysin	metallopeptidase M3 family; mitochondrial inner membrane peptidase activity
		P. Unknown/EST/no homology
		no significant homolog	Arabidopsis thaliana; AT5G23200.1
			CG18446-PA [Drosophila melanogaster]
			CG13731-PA [Drosophila melanogaster]; protein with unknown function
		hypothetical protein	zgc:123242
			XP_147095
			zgc:77375
			XP_415239
			RIKEN cDNA 9130011J15
			MGC20533
			MGC22014
		Unnamed protein product	zinc finger protein 325 [Homo sapiens]
			zinc finger protein 598
			human zinc finger protein 216
			mouse zinc finger protein 91
			mouse ring finger protein 138
			Danio rerio WD repeat domain 48
			WD repeat domain, X-linked 1

## Sheet: Genes in numbers
	categories	unique genes	total transcripts
	Cell proliferation	18	59
	Chromatin	14	53
	Cytoskeleton	16	40
	ECM	22	31
	G protein/ras/rho	16	24
	Signal molecules and rec.	16	33
	Intracellular signaling	20	47
	RNA binding	9	19
	Transcription	17	69
	Cell death	10	21
	Nucleocytoplasmic transport	11	17
	RNA processing	17	54
	Protein prod.& degradation	26	86
	Protein transport	21	49
	Mitochondria/metabolism	7	60
	Miscellaneous	8	8
	Unknown/hypothetical protein	104	104
		352	774
