# Supplementary material for: Molecular Events Controlling Cessation of Trunk Neural Crest Migration and Onset of Differentiation
Source: Front Cell Dev Biol. 2020 Apr 2;8:199. doi: 10.3389/fcell.2020.00199 (PMC7147452; doi:10.3389/fcell.2020.00199)
Supplement: TABLE S2 — Genes from HH16/HH19 macroarray comparison. (A) HH19-HH16 UP: up-regulated genes between HH16 and HH19 (433). (B) HH19-HH16 DOWN: down-regulated genes between HH16 and HH19 (256). HH19-16 IGE: Description HH19 to HH16 ingenuity pathway functional group-cellular movement. HH19-16 IGE groups: HH19-HH16 genes arranged by functionality. [file Table_2.XLSX]

## Sheet: SuppTable 2a. HH19-HH16 UP
Transcript	Control Group Signal	Exp Group Signal	Est Log Ratio	Abs Log Ratio	Raw Est Fold Change	Affy PA Calls Cntl Grp-Exp Grp		Delta (PADE)	Set (PADE)	FDR for Accumulated Sets (PADE)	FDR for Specific Set (PADE)		Individual Transcript p-value		Gene Descriptor	Unigene	Entrez Gene	Gene_Symbol	SeqDerivedFrom	GO Bio_Process	GO Cell Component	GO_Molecular_Function
Gga.138.1.S2_at	121.64	2572.51	4.403	4.403	21.149	AAA-PPP		2.3	1	0.0168	0.0168		0		endothelin receptor B subtype 2	gga.138	373909	EDNRB2	CD218231	7165 // signal transduction // inferred from electronic annotation /// 7186 // G-protein coupled receptor protein signaling pathway // inferred from electronic annotation	16021 // integral to membrane // inferred from electronic annotation	1584 // rhodopsin-like receptor activity // inferred from electronic annotation /// 4871 // signal transducer activity // inferred from electronic annotation /// 4872 // receptor activity // inferred from electronic annotation /// 4930 // G-protein coupled
Gga.1840.1.S1_at	118.56	2468.99	4.38	4.38	20.825	PMA-PPP		2.3	1	0.0168	0.0168		0.0001		neurogenic differentiation 1	gga.1840	395754	NEUROD1	NM_204920.1	6350 // transcription // inferred from electronic annotation /// 6355 // regulation of transcription, DNA-dependent // inferred from electronic annotation /// 7275 // development // inferred from electronic annotation /// 7399 // nervous system development	5634 // nucleus // inferred from electronic annotation	3677 // DNA binding // inferred from electronic annotation /// 30528 // transcription regulator activity // inferred from electronic annotation
Gga.12193.1.S1_a_at	208.74	4323.65	4.372	4.372	20.713	PAA-PPP		2.3	1	0.0168	0.0168		0.0001		G-substrate	gga.12193	420753	C7orf16	BU419249	---	---	---
Gga.1840.1.S2_at	833.78	14209	4.091	4.091	17.042	PPP-PPP		2.3	1	0.0168	0.0168		0.0002		neurogenic differentiation 1	gga.1840	395754	NEUROD1	BU199562	6350 // transcription // inferred from electronic annotation /// 6355 // regulation of transcription, DNA-dependent // inferred from electronic annotation /// 7275 // development // inferred from electronic annotation /// 7399 // nervous system development	5634 // nucleus // inferred from electronic annotation	3677 // DNA binding // inferred from electronic annotation /// 30528 // transcription regulator activity // inferred from electronic annotation
GgaAffx.5578.1.S1_s_at	17.48	291.3	4.059	4.059	16.668	AAA-PPP		1.9	3	0.0236	0.0372		0.0134		GgaAffx.5578.1.S1_s_at
Gga.32.1.S1_at	46.29	665.69	3.846	3.846	14.382	AAA-PPP		2.3	1	0.0168	0.0168		0.0057		mab-21-like 1 (C. elegans)	gga.32	395208	MAB21L1	NM_204533.1	---	---	---
Gga.11680.1.S1_at	1.75	23.64	3.752	3.752	13.476	AAA-MAP		2.3	1	0.0168	0.0168		0.0019		Finished cDNA, clone ChEST915n14	gga.11680	---	---	BX933877.1	---	---	---
GgaAffx.2399.1.S1_s_at	9.43	125.91	3.739	3.739	13.354	AAA-PPP		1.2	10	0.0697	0.1207		0.042		GgaAffx.2399.1.S1_s_at
Gga.10069.1.A1_at	20.47	267.66	3.709	3.709	13.078	AAA-PPP		2.3	1	0.0168	0.0168		0.0009		Gga.10069.1.A1_at	---	---	---	BX935675.2	---	---	---
Gga.616.1.S1_s_at	22.39	291.12	3.7	3.7	13	AAA-PPP		2.3	1	0.0168	0.0168		0.0066		adenylate cyclase activating polypeptide 1 (pituitary)	gga.616	408251	ADCYAP1	BU279525	---	5576 // extracellular region // inferred from electronic annotation	5179 // hormone activity // inferred from electronic annotation
Gga.16173.1.S1_at	6.83	84.49	3.629	3.629	12.374	PAA-PPP		1.1	11	0.0812	0.1412		0.0499		leucine rich repeat transmembrane neuronal 3	gga.16173	423649	LRRTM3	CR386266.1	---	---	---
Gga.138.1.S1_at	156.02	1650.86	3.403	3.403	10.581	AAA-PPP		2.3	1	0.0168	0.0168		0		endothelin receptor B subtype 2	gga.138	373909	EDNRB2	NM_204120.1	7165 // signal transduction // inferred from electronic annotation /// 7186 // G-protein coupled receptor protein signaling pathway // inferred from electronic annotation	16021 // integral to membrane // inferred from electronic annotation	1584 // rhodopsin-like receptor activity // inferred from electronic annotation /// 4871 // signal transducer activity // inferred from electronic annotation /// 4872 // receptor activity // inferred from electronic annotation /// 4930 // G-protein coupled
Gga.488.1.S1_at	442.8	4684.86	3.403	3.403	10.58	PPP-PPP		2.3	1	0.0168	0.0168		0.0002		achaete-scute complex-like 1(Drosophila)	gga.488	386573	ASCL1	NM_204412.1	45449 // regulation of transcription // inferred from electronic annotation	5634 // nucleus // inferred from electronic annotation	30528 // transcription regulator activity // inferred from electronic annotation
GgaAffx.21066.1.S1_at	28.69	300.94	3.391	3.391	10.489	AAA-PPA		2.3	1	0.0168	0.0168		0		GgaAffx.21066.1.S1_at
Gga.19620.1.S1_at	70.47	728.22	3.369	3.369	10.334	AAA-PPP		2.3	1	0.0168	0.0168		0.0001		Finished cDNA, clone ChEST382l11	gga.19620	---	---	CR406188.1	---	---	---
Gga.1507.1.S1_at	503.48	5182.01	3.364	3.364	10.292	PPP-PPP		2.3	1	0.0168	0.0168		0.0001		ISL1 transcription factor, LIM/homeodomain, (islet-1)	gga.1507	396383	ISL1	NM_205414.1	6355 // regulation of transcription, DNA-dependent // inferred from electronic annotation /// 7275 // development // inferred from electronic annotation /// 45449 // regulation of transcription // inferred from electronic annotation	5634 // nucleus // inferred from electronic annotation	3677 // DNA binding // inferred from electronic annotation /// 3700 // transcription factor activity // inferred from electronic annotation /// 8270 // zinc ion binding // inferred from electronic annotation /// 46872 // metal ion binding // inferred from
Gga.1507.1.S2_at	326.04	3289.61	3.335	3.335	10.09	PPP-PPP		2.3	1	0.0168	0.0168		0		Gga.1507.1.S2_at	---	---	---	NM_205414.1	---	---	---
GgaAffx.24875.1.S1_s_at	13.41	131.63	3.295	3.295	9.817	AAA-PAP		2.3	1	0.0168	0.0168		0.0019		GgaAffx.24875.1.S1_s_at
GgaAffx.10971.1.S1_at	23.24	223.88	3.268	3.268	9.634	AAA-PPA		1.2	10	0.0697	0.1207		0.0412		GgaAffx.10971.1.S1_at
Gga.13567.1.S1_at	143.3	1360.09	3.247	3.247	9.491	AMP-PPP		2.3	1	0.0168	0.0168		0.0005		T-cell leukemia, homeobox 3	gga.21135	395867	TLX3	NM_205014.1	6355 // regulation of transcription, DNA-dependent // inferred from electronic annotation /// 7275 // development // inferred from electronic annotation /// 45449 // regulation of transcription // inferred from electronic annotation	5634 // nucleus // inferred from electronic annotation	3677 // DNA binding // inferred from electronic annotation /// 3700 // transcription factor activity // inferred from electronic annotation
Gga.10425.1.S1_s_at	14.12	131.54	3.22	3.22	9.316	AAA-PMP		1.2	10	0.0697	0.1207		0.0388		Finished cDNA, clone ChEST11e14	gga.10425	---	---	BX933939.1	---	---	---
Gga.1607.2.S1_s_at	13.27	120.06	3.178	3.178	9.048	AAA-PAA		2.3	1	0.0168	0.0168		0.0025		Finished cDNA, clone ChEST191i4 /// Finished cDNA, clone ChEST442e16	gga.10384	---	---	CR338750.1	---	---	---
GgaAffx.4376.1.S1_at	15.85	137.12	3.113	3.113	8.653	AAA-PMM		1.4	8	0.0503	0.0865		0.0291		similar to kinase non-catalytic C-lobe domain (KIND) containing 1 isoform a; RasGEF domain family, member 2; chromosome 10 open reading frame 23	---	423823	LOC423823	ENSGALT00000011322.1	---	---	---
Gga.19656.1.S1_at	16.69	143.56	3.105	3.105	8.603	PAA-PPP		1.9	3	0.0236	0.0372		0.0103		similar to RIKEN cDNA 3830422K02	gga.19656	423067	LOC423067	CR406340.1	---	---	---
GgaAffx.6469.1.S1_s_at	32.66	278.77	3.093	3.093	8.535	AAA-PPA		1.1	11	0.0812	0.1412		0.0484		GgaAffx.6469.1.S1_s_at
Gga.10963.1.S1_at	78.66	626.66	2.994	2.994	7.966	AAA-PPP		2.3	1	0.0168	0.0168		0.0018		Finished cDNA, clone ChEST392m8	gga.10963	---	---	BX931525.1	---	---	---
Gga.19007.1.S1_at	38.35	302.9	2.981	2.981	7.898	AAA-PPP		2.3	1	0.0168	0.0168		0.006		Finished cDNA, clone ChEST200o6	gga.19007	---	---	BU484294	---	---	---
GgaAffx.21576.1.S1_s_at	586.09	4561.15	2.96	2.96	7.782	PPP-PPP		2.3	1	0.0168	0.0168		0.0006		GgaAffx.21576.1.S1_s_at
GgaAffx.26357.2.S1_s_at	36.39	281.35	2.951	2.951	7.731	AAA-PPP		2.1	2	0.0198	0.0347		0.0076		GgaAffx.26357.2.S1_s_at
GgaAffx.20917.1.S1_s_at	59.42	458.13	2.947	2.947	7.71	PAA-PPP		2.3	1	0.0168	0.0168		0.0006		GgaAffx.20917.1.S1_s_at
Gga.4798.1.S1_at	85.53	645.13	2.915	2.915	7.543	MAA-PPP		1.9	3	0.0236	0.0372		0.0106		glycoprotein M6A	gga.4798	422569	GPM6A	BU353595	---	---	---
Gga.12649.1.S1_at	148.49	1079.21	2.862	2.862	7.268	PAA-PPP		2.3	1	0.0168	0.0168		0.0009		galanin	gga.12649	423117	GAL	BX930206.2	---	---	---
GgaAffx.9517.1.S1_at	14.11	101.57	2.848	2.848	7.198	AAA-PAA		2.3	1	0.0168	0.0168		0.0042		similar to heparan sulfate (glucosamine) 3-O-sulfotransferase 5; heparan sulfate 3-OST-5	---	428621	LOC428621	ENSGALT00000024172.1	---	---	---
GgaAffx.20378.1.S1_at	20.65	146.09	2.823	2.823	7.076	AAA-PAP		2.1	2	0.0198	0.0347		0.0076		GgaAffx.20378.1.S1_at
Gga.294.1.S1_at	86.34	609.52	2.82	2.82	7.059	APP-PPP		2.3	1	0.0168	0.0168		0.0002		Phox2b protein	gga.294	395548	PHOX2B	AJ251458.1	6355 // regulation of transcription, DNA-dependent // inferred from electronic annotation /// 45449 // regulation of transcription // inferred from electronic annotation	5634 // nucleus // inferred from electronic annotation	3677 // DNA binding // inferred from electronic annotation /// 3700 // transcription factor activity // inferred from electronic annotation
Gga.4807.1.S1_a_at	23.73	166.18	2.808	2.808	7.004	AAA-AAP		2.3	1	0.0168	0.0168		0.003		synaptosomal-associated protein, 25kDa	gga.4807	396444	SNAP25	NM_205458.1	---	19717 // synaptosome // inferred from electronic annotation	---
Gga.1585.1.S2_at	821.2	5645.18	2.781	2.781	6.874	PPP-PPP		2.3	1	0.0168	0.0168		0.0024		stathmin-like 2	gga.1585	396095	STMN2	BU273924	7242 // intracellular signaling cascade // inferred from electronic annotation	16020 // membrane // inferred from electronic annotation	---
Gga.13370.1.S1_at	379.98	2566.99	2.756	2.756	6.756	PPP-PPP		2.3	1	0.0168	0.0168		0.0001		Finished cDNA, clone ChEST411b18	gga.13370	---	---	CR353049.1	---	---	---
Gga.19342.1.S1_at	40.22	266.67	2.729	2.729	6.63	AAA-PAA		1.1	11	0.0812	0.1412		0.0465		Finished cDNA, clone ChEST834i13	gga.19342	---	---	BU309753	---	---	---
Gga.17307.1.S1_at	25.07	164.92	2.718	2.718	6.578	PAP-PPP		1.1	11	0.0812	0.1412		0.0498		nuclear factor I/B	gga.709	396209	NFIB	BU415032	6260 // DNA replication // inferred from electronic annotation /// 6350 // transcription // inferred from electronic annotation /// 6355 // regulation of transcription, DNA-dependent // inferred from electronic annotation	5622 // intracellular // inferred from electronic annotation /// 5634 // nucleus // inferred from electronic annotation	3677 // DNA binding // inferred from electronic annotation /// 3700 // transcription factor activity // inferred from electronic annotation
Gga.1695.1.S1_at	93.96	612.04	2.704	2.704	6.514	AAA-AAP		1.6	6	0.0361	0.0591		0.0198		Finished cDNA, clone ChEST855k6	gga.1695	---	---	AL587893	---	---	---
Gga.19701.1.S1_at	56.27	366.4	2.703	2.703	6.512	AAA-PAP		1.9	3	0.0236	0.0372		0.0096		Finished cDNA, clone ChEST736n4	gga.19701	---	---	CR406515.1	---	---	---
Gga.770.1.S1_at	33.7	210.19	2.641	2.641	6.238	AAA-AMP		1.9	3	0.0236	0.0372		0.0099		sensory organ homeobox protein SOHo	gga.770	396346	SOHO-1	NM_205386.1	6355 // regulation of transcription, DNA-dependent // inferred from electronic annotation /// 7275 // development // inferred from electronic annotation /// 45449 // regulation of transcription // inferred from electronic annotation	5634 // nucleus // inferred from electronic annotation	3677 // DNA binding // inferred from electronic annotation /// 3700 // transcription factor activity // inferred from electronic annotation
Gga.18415.1.S1_at	114.63	707.69	2.626	2.626	6.174	AAA-PPP		2.3	1	0.0168	0.0168		0.0002		Finished cDNA, clone ChEST663m21	gga.18415	---	---	CR390531.1	---	---	---
Gga.11945.1.S1_at	33.58	204.73	2.608	2.608	6.097	AAA-PAM		1.5	7	0.0444	0.1043		0.023		similar to chromosome 2 open reading frame 32	gga.11945	421266	LOC421266	BX935010.1	---	---	---
Gga.4807.1.S2_a_at	67.56	407.42	2.592	2.592	6.03	PPP-PPP		2.3	1	0.0168	0.0168		0.0005		Synaptosomal-associated protein, 25kDa	gga.4807	396444	SNAP-25	BU353164	---	19717 // synaptosome // inferred from electronic annotation	---
Gga.2734.1.S2_at	504.17	3030.04	2.587	2.587	6.01	PPP-PPP		2.3	1	0.0168	0.0168		0.0002		activated leukocyte cell adhesion molecule	gga.2734	396092	ALCAM	NM_205179.1	7155 // cell adhesion // inferred from electronic annotation	16021 // integral to membrane // inferred from electronic annotation	5515 // protein binding // inferred from electronic annotation
Gga.10503.1.S1_at	65.86	387	2.555	2.555	5.876	AAA-PPP		1.9	3	0.0236	0.0372		0.0118		Finished cDNA, clone ChEST47n21	gga.10503	---	---	BU216817	---	---	---
Gga.4420.2.S1_a_at	537.42	3100.44	2.528	2.528	5.769	PPP-PPP		2.1	2	0.0198	0.0347		0.0073		reticulon 1	gga.4420	378791	RTN1	U17606.1	---	5783 // endoplasmic reticulum // inferred from electronic annotation	---
GgaAffx.25281.1.S1_at	14.53	82.51	2.505	2.505	5.678	AAA-PAA		1.4	8	0.0503	0.0865		0.0275		GgaAffx.25281.1.S1_at
Gga.17071.1.S1_at	582.9	3307.06	2.504	2.504	5.673	PPP-PPP		2.3	1	0.0168	0.0168		0.0001		Finished cDNA, clone ChEST271o1	gga.17071	---	---	BU210790	---	---	---
GgaAffx.3695.1.S1_s_at	153.27	864.07	2.495	2.495	5.638	AAA-PPP		2.3	1	0.0168	0.0168		0.0011		GgaAffx.3695.1.S1_s_at
Gga.2734.1.S1_at	343.09	1876.94	2.452	2.452	5.471	PPP-PPP		2.3	1	0.0168	0.0168		0.0002		activated leukocyte cell adhesion molecule	gga.2734	396092	ALCAM	M76678.1	7155 // cell adhesion // inferred from electronic annotation	16021 // integral to membrane // inferred from electronic annotation	5515 // protein binding // inferred from electronic annotation
Gga.2717.1.S1_at	222.05	1197.54	2.431	2.431	5.393	PAP-PPP		2.3	1	0.0168	0.0168		0.0039		Finished cDNA, clone ChEST491f4	gga.2717	---	---	BU139237	---	---	---
Gga.1611.1.A1_at	15.52	80.3	2.371	2.371	5.174	AAA-PPP		1.2	10	0.0697	0.1207		0.0364		Transcribed locus	gga.1611	---	---	AL587669	---	---	---
Gga.238.1.S1_at	121.78	622.4	2.354	2.354	5.111	PPP-PPP		2.3	1	0.0168	0.0168		0.0012		leucine rich repeat containing 17	gga.238	395440	LRRC17	BU439727	---	---	---
GgaAffx.10647.1.S1_s_at	170.87	862.12	2.335	2.335	5.045	PPM-PPP		2.3	1	0.0168	0.0168		0		GgaAffx.10647.1.S1_s_at
Gga.19102.1.S1_at	63.01	316.98	2.331	2.331	5.031	AAA-PMP		1.7	5	0.0332	0.0648		0.0164		Finished cDNA, clone ChEST996f5	gga.19102	---	---	BU467700	---	---	---
GgaAffx.8074.2.S1_s_at	136.47	683.89	2.325	2.325	5.011	AAA-PPP		1.3	9	0.0579	0.1141		0.0338		GgaAffx.8074.2.S1_s_at
Gga.18415.1.A1_at	17.58	87.34	2.313	2.313	4.969	AAA-PMP		2.3	1	0.0168	0.0168		0.0021		Finished cDNA, clone ChEST663m21	gga.18415	---	---	CR390531.1	---	---	---
Gga.407.1.S1_at	145.35	719.38	2.307	2.307	4.949	PPP-PPP		2.3	1	0.0168	0.0168		0.0005		neurogenin 1	gga.407	395699	NEUROG1	NM_204883.1	45449 // regulation of transcription // inferred from electronic annotation	5634 // nucleus // inferred from electronic annotation	30528 // transcription regulator activity // inferred from electronic annotation
Gga.17776.1.S1_at	27.66	135.29	2.29	2.29	4.891	AAA-PAP		1.9	3	0.0236	0.0372		0.0101		Finished cDNA, clone ChEST887i3	gga.17776	---	---	BU352408	---	---	---
Gga.11430.1.S1_at	327.61	1591.42	2.28	2.28	4.858	PPP-PPP		2.3	1	0.0168	0.0168		0.0001		proenkephalin	gga.11430	421131	PENK	BU351001	---	---	---
Gga.12437.2.S1_at	445.82	2143.9	2.266	2.266	4.809	PPM-PPP		2.3	1	0.0168	0.0168		0		similar to chromogranin A precursor - mouse	---	423420	LOC423420	BU118220	---	---	---
Gga.7011.1.S1_a_at	232.18	1094.14	2.237	2.237	4.713	PAP-PPP		2.3	1	0.0168	0.0168		0		similar to cAMP-dependent protein kinase inhibitor gamma	gga.7011	419195	LOC419195	CR386158.1	---	---	---
GgaAffx.21783.1.S1_s_at	87.34	405.91	2.216	2.216	4.647	AAA-PMA		2.3	1	0.0168	0.0168		0.0012		GgaAffx.21783.1.S1_s_at
Gga.14129.1.S1_at	116.82	541.92	2.214	2.214	4.639	PPP-PPP		2.3	1	0.0168	0.0168		0.0003		Finished cDNA, clone ChEST134m6	gga.14129	---	---	CR353201.1	---	---	---
Gga.16364.1.S1_at	1263.13	5824.8	2.205	2.205	4.611	PPP-PPP		2.3	1	0.0168	0.0168		0.0003		Finished cDNA, clone ChEST457d18	gga.16364	---	---	BU116366	---	---	---
GgaAffx.21779.1.S1_s_at	369.56	1700.84	2.202	2.202	4.602	AAA-PPP		2.3	1	0.0168	0.0168		0.0033		GgaAffx.21779.1.S1_s_at
GgaAffx.4385.1.S1_at	31.37	142.51	2.184	2.184	4.543	AAA-PPM		2.1	2	0.0198	0.0347		0.0072		similar to kinase non-catalytic C-lobe domain (KIND) containing 1 isoform a; RasGEF domain family, member 2; chromosome 10 open reading frame 23	---	423824	LOC423824	ENSGALT00000011341.1	---	---	---
Gga.4807.1.S2_x_at	99.67	451.33	2.179	2.179	4.528	PAA-PPP		2.3	1	0.0168	0.0168		0.0005		Synaptosomal-associated protein, 25kDa	gga.4807	396444	SNAP-25	BU353164	---	19717 // synaptosome // inferred from electronic annotation	---
GgaAffx.4921.3.S1_s_at	39.87	179.07	2.167	2.167	4.492	AAA-APA		1.1	11	0.0812	0.1412		0.045		GgaAffx.4921.3.S1_s_at
Gga.17204.1.S1_at	92.69	406.99	2.135	2.135	4.391	PAP-PPP		2.3	1	0.0168	0.0168		0.0019		Finished cDNA, clone ChEST181c3	gga.17204	---	---	BU319228	---	---	---
GgaAffx.21278.1.S1_at	68.51	299.34	2.127	2.127	4.369	AAA-PAA		1.4	8	0.0503	0.0865		0.0266		GgaAffx.21278.1.S1_at
Gga.15913.1.S1_at	24.99	108.72	2.121	2.121	4.35	AAA-PPP		1.1	11	0.0812	0.1412		0.0439		Finished cDNA, clone ChEST487d19	gga.15913	---	---	BU217327	---	---	---
GgaAffx.25710.1.S1_at	81.15	349.63	2.107	2.107	4.308	AAP-PPP		1.9	3	0.0236	0.0372		0.0096		GgaAffx.25710.1.S1_at
GgaAffx.7709.1.S1_at	332.72	1432.14	2.106	2.106	4.304	PPP-PPP		2.3	1	0.0168	0.0168		0		similar to KIAA1492 protein	---	424280	LOC424280	ENSGALT00000019852.1	---	---	---
Gga.2724.1.S1_at	28.68	122.94	2.1	2.1	4.287	AAA-PPP		2.3	1	0.0168	0.0168		0.0011		Finished cDNA, clone ChEST446j8	gga.2724	---	---	BU274023	---	---	---
Gga.8344.2.A1_a_at	151.35	640.92	2.082	2.082	4.235	AAA-PPP		2.3	1	0.0168	0.0168		0.0003		regulator of G-protein signalling 3	gga.8344	395110	RGS3	AY124775.1	9968 // negative regulation of signal transduction // inferred from electronic annotation	---	4871 // signal transducer activity // inferred from electronic annotation /// 5515 // protein binding // inferred from electronic annotation
Gga.2845.1.S1_at	94.38	395.47	2.067	2.067	4.19	PAA-PPP		1.2	10	0.0697	0.1207		0.0346		Cbp/p300-interacting transactivator, with Glu/Asp-rich carboxy-terminal domain, 2	gga.2845	395399	CITED2	NM_206844.1	45449 // regulation of transcription // inferred from electronic annotation	5634 // nucleus // inferred from electronic annotation	30528 // transcription regulator activity // inferred from electronic annotation
GgaAffx.24566.1.S1_at	438.97	1838.46	2.066	2.066	4.188	PPP-PPP		2.3	1	0.0168	0.0168		0.0001		GgaAffx.24566.1.S1_at
Gga.2128.1.S1_at	248.89	1042.12	2.066	2.066	4.187	PPP-PPP		2.3	1	0.0168	0.0168		0.0012		Gga.2128.1.S1_at	---	---	---	BU435903	---	---	---
Gga.13268.1.S1_at	77.95	322.73	2.05	2.05	4.14	PMP-PPP		2.3	1	0.0168	0.0168		0.0021		Finished cDNA, clone ChEST126b15	gga.13268	---	---	BU351739	---	---	---
Gga.18130.1.S1_at	363.79	1493.88	2.038	2.038	4.106	PPP-PPP		2.3	1	0.0168	0.0168		0.0006		Finished cDNA, clone ChEST478c4	gga.18130	---	---	BU272119	---	---	---
Gga.9667.1.S1_s_at	198.48	815.02	2.038	2.038	4.106	PPP-PPP		1.6	6	0.0361	0.0591		0.0189		chondrolectin	gga.9667	418474	CHODL	BX934063.2	---	---	---
GgaAffx.23139.1.S1_x_at	15.13	61.55	2.025	2.025	4.069	AAA-PAA		2.3	1	0.0168	0.0168		0.0007		GgaAffx.23139.1.S1_x_at
Gga.16413.4.S1_at	69.85	283.21	2.019	2.019	4.054	AAA-PPP		1.7	5	0.0332	0.0648		0.016		Stathmin-like 3	gga.22576	419263	NPC2	CR352356.1	7242 // intracellular signaling cascade // inferred from electronic annotation	---	---
Gga.12092.1.S1_at	126.94	513.84	2.017	2.017	4.048	AAA-PPP		1.9	3	0.0236	0.0372		0.0107		family with sequence similarity 20, member C	gga.12092	416445	FAM20C	BU369564	---	---	---
Gga.1969.1.S1_at	58.86	236.26	2.005	2.005	4.014	AAA-PPP		2.3	1	0.0168	0.0168		0.0004		LOC423523	---	423523	LOC423523	BU202831	---	---	---
GgaAffx.10715.1.S1_at	57.63	229.85	1.996	1.996	3.988	AAA-PPA		1.8	4	0.0277	0.0556		0.0116		GgaAffx.10715.1.S1_at
Gga.4798.1.S1_s_at	231.82	923.94	1.995	1.995	3.986	PMA-PPP		2.3	1	0.0168	0.0168		0.0023		glycoprotein M6A	gga.4798	422569	GPM6A	BU353595	---	---	---
Gga.19786.1.S1_at	125.25	496.79	1.988	1.988	3.966	AAA-PPP		2.3	1	0.0168	0.0168		0.0026		Finished cDNA, clone ChEST873l9	gga.19786	---	---	CR406785.1	---	---	---
GgaAffx.21563.1.S1_at	307.41	1215.65	1.984	1.984	3.955	PPP-PPP		2.3	1	0.0168	0.0168		0.0001		GgaAffx.21563.1.S1_at
Gga.15280.1.S1_s_at	23.5	92.69	1.98	1.98	3.944	AAA-PAA		1.2	10	0.0697	0.1207		0.0368		Finished cDNA, clone ChEST491d14	gga.14583	---	---	CN223021	---	---	---
GgaAffx.10061.1.S1_at	112.68	442.68	1.974	1.974	3.929	AAA-PPP		2.3	1	0.0168	0.0168		0.0001		GgaAffx.10061.1.S1_at
Gga.4965.2.S1_at	102.26	399.71	1.967	1.967	3.909	AAA-PPP		2.3	1	0.0168	0.0168		0.0002		Collagen type XII alpha 1 chain	gga.4965	395875	LOC395875	BU424353	6817 // phosphate transport // inferred from electronic annotation /// 7155 // cell adhesion // inferred from electronic annotation	5578 // extracellular matrix (sensu Metazoa) // inferred from electronic annotation /// 5737 // cytoplasm // inferred from electronic annotation	5198 // structural molecule activity // inferred from electronic annotation /// 5515 // protein binding // inferred from electronic annotation
GgaAffx.20275.1.S1_s_at	136.3	530.43	1.96	1.96	3.892	PPA-PPP		2.3	1	0.0168	0.0168		0.0019		GgaAffx.10061.1.S1_at
Gga.1446.1.S1_at	22.65	87.5	1.949	1.949	3.862	AAA-PPP		2.1	2	0.0198	0.0347		0.0064		Transcribed locus	gga.1446	---	---	AL584217	---	---	---
Gga.3219.1.S1_at	892.14	3425.14	1.941	1.941	3.839	PPP-PPP		2.3	1	0.0168	0.0168		0		c-fos induced growth factor (vascular endothelial growth factor D)	gga.3219	395255	FIGF	NM_204568.1	74 // regulation of progression through cell cycle // inferred from electronic annotation /// 8283 // cell proliferation // inferred from electronic annotation	16020 // membrane // inferred from electronic annotation	8083 // growth factor activity // inferred from electronic annotation
GgaAffx.9345.1.S1_at	31.97	121.25	1.923	1.923	3.792	AAP-PPP		1.5	7	0.0444	0.1043		0.0209		similar to RAB3C, member RAS oncogene family	---	431578	LOC431578	ENSGALT00000023749.1	---	---	---
Gga.13462.1.S1_at	98.75	371.26	1.911	1.911	3.76	PPP-PPP		2.3	1	0.0168	0.0168		0		hypothetical gene supported by CR353001	---	420496	LOC420496	BU339735	---	---	---
GgaAffx.22466.1.S1_s_at	153.01	575.17	1.91	1.91	3.759	PPP-PPP		2.3	1	0.0168	0.0168		0.0048		GgaAffx.22466.1.S1_s_at
GgaAffx.21643.1.S1_at	32.53	122.24	1.91	1.91	3.757	MAA-PPP		1.2	10	0.0697	0.1207		0.0394		GgaAffx.21643.1.S1_at
Gga.9093.1.S1_a_at	337.56	1264.33	1.905	1.905	3.746	PPP-PPP		2.3	1	0.0168	0.0168		0.0033		drebrin 1	gga.9093	396496	DBN1	NM_205499.1	7275 // development // inferred from electronic annotation /// 7399 // nervous system development // inferred from electronic annotation /// 30154 // cell differentiation // inferred from electronic annotation	5622 // intracellular // inferred from electronic annotation	3779 // actin binding // inferred from electronic annotation
Gga.16806.1.S1_at	96.66	361.55	1.903	1.903	3.74	AAA-PPP		1.1	11	0.0812	0.1412		0.0468		homer homolog 3 (Drosophila)	gga.16806	420115	HOMER3	BU473755	---	---	---
Gga.19519.1.S1_at	83.55	312.03	1.901	1.901	3.735	PPP-PPP		2.3	1	0.0168	0.0168		0.0029		Finished cDNA, clone ChEST572i4	gga.19519	---	---	BU415347	---	---	---
Gga.964.1.S1_at	223.22	832.93	1.9	1.9	3.731	PPP-PPP		2.3	1	0.0168	0.0168		0.0048		T-box 2	gga.964	373990	TBX2	AF069393.1	6355 // regulation of transcription, DNA-dependent // inferred from electronic annotation	5634 // nucleus // inferred from electronic annotation	3700 // transcription factor activity // inferred from electronic annotation
Gga.17659.1.S1_at	142.56	526.33	1.884	1.884	3.692	MPA-PPP		2.1	2	0.0198	0.0347		0.0065		butyrylcholinesterase	gga.51	395358	BCHE	BU314914	---	---	3824 // catalytic activity // inferred from electronic annotation /// 4104 // cholinesterase activity // inferred from electronic annotation /// 4759 // serine esterase activity // inferred from electronic annotation /// 16787 // hydrolase activity // infe
GgaAffx.26361.1.S1_s_at	135	494.89	1.874	1.874	3.666	AAA-PPP		2.3	1	0.0168	0.0168		0.0003		GgaAffx.26361.1.S1_s_at
Gga.20066.1.S1_at	576.86	2109.83	1.871	1.871	3.657	PPP-PPP		2.3	1	0.0168	0.0168		0.003		Finished cDNA, clone ChEST852e23	gga.20066	---	---	BU316761	---	---	---
Gga.4420.2.S1_at	371.79	1354.97	1.866	1.866	3.644	PPP-PPP		2.3	1	0.0168	0.0168		0.0048		reticulon 1	gga.4420	378791	RTN1	U17606.1	---	5783 // endoplasmic reticulum // inferred from electronic annotation	---
Gga.19889.1.S1_at	41.88	152.01	1.86	1.86	3.629	AAA-PPP		2.3	1	0.0168	0.0168		0.0011		Finished cDNA, clone ChEST749h23	gga.19889	---	---	BU107726	---	---	---
Gga.16377.1.S1_at	41.29	149.34	1.855	1.855	3.617	AAA-PPP		1.8	4	0.0277	0.0556		0.0106		Finished cDNA, clone ChEST491b6	gga.16377	---	---	BU469012	---	---	---
Gga.4420.1.S1_x_at	581.04	2092.37	1.848	1.848	3.601	PPP-PPP		1.9	3	0.0236	0.0372		0.01		reticulon 1	gga.4420	378791	RTN1	U17605.1	---	5783 // endoplasmic reticulum // inferred from electronic annotation	---
Gga.1661.3.S1_s_at	100.56	359.71	1.839	1.839	3.577	APP-PPP		1.9	3	0.0236	0.0372		0.0076		similar to engulfment and cell motility 1 isoform 1; ced-12 homolog 1 /// similar to hypothetical protein	gga.20205	420735 /	LOC420735 /// LOC420736	BU227167	6909 // phagocytosis // inferred from electronic annotation /// 6915 // apoptosis // inferred from electronic annotation	5856 // cytoskeleton // inferred from electronic annotation	5488 // binding // inferred from electronic annotation
Gga.2460.1.S1_at	188.99	672.23	1.831	1.831	3.557	PPP-PPP		2.3	1	0.0168	0.0168		0.001		prospero-related homeobox 1	gga.2460	395802	PROX1	U46563.1	6350 // transcription // inferred from electronic annotation /// 6355 // regulation of transcription, DNA-dependent // inferred from electronic annotation /// 7275 // development // inferred from electronic annotation /// 45449 // regulation of transcripti	5634 // nucleus // inferred from electronic annotation	3677 // DNA binding // inferred from electronic annotation /// 30528 // transcription regulator activity // inferred from electronic annotation
Gga.276.2.S1_a_at	121.28	429.59	1.825	1.825	3.542	AAA-PPP		1.8	4	0.0277	0.0556		0.0122		early B-cell factor	gga.276	395512	EBF	AJ446294	6355 // regulation of transcription, DNA-dependent // inferred from electronic annotation	5634 // nucleus // inferred from electronic annotation	3677 // DNA binding // inferred from electronic annotation
Gga.18617.1.S1_at	46.74	164.43	1.815	1.815	3.518	AAA-PAA		1.8	4	0.0277	0.0556		0.0119		Finished cDNA, clone ChEST181g16	gga.18617	---	---	BU460026	---	---	---
Gga.10040.1.S1_at	24.15	84.6	1.809	1.809	3.503	AAA-PAA		1.1	11	0.0812	0.1412		0.0419		Transcribed locus, moderately similar to NP_031705.2 CCAAT/enhancer binding protein delta [Mus musculus]	gga.10040	---	---	CK614519	---	---	---
Gga.5461.1.S1_at	334.66	1167.56	1.803	1.803	3.489	PPP-PPP		2.3	1	0.0168	0.0168		0.0021		Finished cDNA, clone ChEST938n22	gga.5461	---	---	BU118178	---	---	---
Gga.15833.1.S1_at	48.56	166.99	1.782	1.782	3.439	AAA-PAA		1.7	5	0.0332	0.0648		0.015		similar to hypothetical protein FLJ13386	gga.15833	424873	LOC424873	BU260098	---	---	---
Gga.10720.1.S1_at	15.14	51.91	1.777	1.777	3.428	AAA-PAA		1.3	9	0.0579	0.1141		0.0273		Finished cDNA, clone ChEST269e3	gga.10720	---	---	BU452631	---	---	---
GgaAffx.8298.1.S1_at	38.13	130.55	1.776	1.776	3.424	PAA-PPP		1.2	10	0.0697	0.1207		0.0383		uridine phosphorylase 1	gga.20540	420942	UPP1	ENSGALT00000021347.1	---	---	---
GgaAffx.2955.1.S1_at	47.32	161.83	1.774	1.774	3.42	AAA-PAA		1.5	7	0.0444	0.1043		0.0186		similar to delayed rectifier potassium channel Kv2.1	---	428146	LOC428146	ENSGALT00000007591.1	---	---	---
Gga.16795.1.S1_at	52.79	179.69	1.767	1.767	3.404	PPA-PPP		1.9	3	0.0236	0.0372		0.0078		Finished cDNA, clone ChEST594a22	gga.16795	---	---	BU344599	---	---	---
GgaAffx.21386.1.S1_s_at	325.93	1109.24	1.767	1.767	3.403	PPP-PPP		2.3	1	0.0168	0.0168		0.0003		GgaAffx.21386.1.S1_s_at
Gga.16208.1.S1_at	91.3	309.3	1.76	1.76	3.388	PAA-PPP		1.8	4	0.0277	0.0556		0.012		Gga.16208.1.S1_at	---	---	---	BU342852	---	---	---
Gga.16748.1.S1_at	344.19	1156.87	1.749	1.749	3.361	PPP-PPP		2.3	1	0.0168	0.0168		0.0029		Finished cDNA, clone ChEST742d11	gga.16748	---	---	BU299536	---	---	---
Gga.11533.1.S1_at	350.91	1174.5	1.743	1.743	3.347	PPP-PPP		2.3	1	0.0168	0.0168		0.0009		Transcribed locus	gga.11533	---	---	CK609706	---	---	---
GgaAffx.21581.1.S1_s_at	97.36	325.7	1.742	1.742	3.345	AAA-PPP		2.3	1	0.0168	0.0168		0.003		GgaAffx.21581.1.S1_s_at
Gga.3264.1.S2_at	130.55	435.59	1.738	1.738	3.337	AMA-PPP		2.3	1	0.0168	0.0168		0.0007		aryl hydrocarbon receptor	gga.3264	373907	AHR	BU465235	6355 // regulation of transcription, DNA-dependent // inferred from electronic annotation /// 7165 // signal transduction // inferred from electronic annotation /// 45449 // regulation of transcription // inferred from electronic annotation	5634 // nucleus // inferred from electronic annotation	4871 // signal transducer activity // inferred from electronic annotation /// 4872 // receptor activity // inferred from electronic annotation /// 30528 // transcription regulator activity // inferred from electronic annotation
Gga.14113.1.S1_at	41.23	137.38	1.736	1.736	3.332	AAA-PAA		2.3	1	0.0168	0.0168		0.0046		Finished cDNA, clone ChEST43k7	gga.14113	---	---	BU393856	---	---	---
Gga.6424.1.S1_s_at	133.54	442.99	1.73	1.73	3.317	PAP-PPP		2.3	1	0.0168	0.0168		0.0001		Finished cDNA, clone ChEST476j17	gga.6424	---	---	BU228886	---	---	---
GgaAffx.10714.1.S1_s_at	54.29	179.77	1.727	1.727	3.311	AAA-PPA		1.1	11	0.0812	0.1412		0.0468		GgaAffx.10714.1.S1_s_at
Gga.742.1.S1_at	55.5	181.5	1.709	1.709	3.27	AAA-PAM		1.6	6	0.0361	0.0591		0.0156		somatostatin	gga.742	396279	SST	NM_205336.1	---	5576 // extracellular region // inferred from electronic annotation	5179 // hormone activity // inferred from electronic annotation
Gga.10978.1.S1_a_at	155.94	507.4	1.702	1.702	3.254	PPA-PPP		2.3	1	0.0168	0.0168		0.005		Finished cDNA, clone ChEST336n24	gga.10978	---	---	BX931457.2	---	---	---
GgaAffx.3719.3.S1_s_at	146.06	471.6	1.691	1.691	3.229	PPP-PPP		2.3	1	0.0168	0.0168		0.0006		GgaAffx.3719.3.S1_s_at
Gga.16806.3.S1_at	294.27	949.94	1.691	1.691	3.228	PPP-PPP		1.6	6	0.0361	0.0591		0.016		Homer homolog 3 (Drosophila)	gga.16806	420115	---	BU142040	---	---	---
Gga.588.1.S1_at	550.47	1762.26	1.679	1.679	3.201	PPP-PPP		1.8	4	0.0277	0.0556		0.0111		GDNF family receptor alpha 1	gga.588	395994	GFRA1	NM_205102.1	---	16020 // membrane // inferred from electronic annotation	4872 // receptor activity // inferred from electronic annotation
Gga.17317.1.S1_s_at	269.59	856.32	1.667	1.667	3.176	PPP-PPP		2.3	1	0.0168	0.0168		0.002		Finished cDNA, clone ChEST275j6	gga.14690	---	---	BU485272	---	---	---
Gga.4053.1.S1_at	288.93	916.09	1.665	1.665	3.171	PPA-PPP		1.6	6	0.0361	0.0591		0.0167		eukaryotic translation elongation factor 1 alpha 2	gga.4053	419244	EEF1A2	BX934090.2	---	---	---
Gga.13923.1.S1_at	63.14	199.81	1.662	1.662	3.165	APP-PPP		1.6	6	0.0361	0.0591		0.016		Finished cDNA, clone ChEST214g15	gga.13923	---	---	BU222072	---	---	---
GgaAffx.3022.1.S1_at	70.57	220.72	1.645	1.645	3.128	APA-PPP		1.2	10	0.0697	0.1207		0.0327		GgaAffx.3022.1.S1_at	---	---	---	ENSGALT00000007780.1	---	---	---
Gga.12954.1.S1_at	1391.97	4339.08	1.64	1.64	3.117	PPP-PPP		2.3	1	0.0168	0.0168		0.001		Finished cDNA, clone ChEST352d19	gga.12954	---	---	BU262255	---	---	---
Gga.1661.2.S1_s_at	284.01	881.55	1.634	1.634	3.104	PAA-PPP		2.3	1	0.0168	0.0168		0.0045		similar to engulfment and cell motility 1 isoform 1; ced-12 homolog 1	gga.20205	420735	LOC420735	BU280001	6909 // phagocytosis // inferred from electronic annotation /// 6915 // apoptosis // inferred from electronic annotation	5856 // cytoskeleton // inferred from electronic annotation	5488 // binding // inferred from electronic annotation
Gga.3264.1.S1_at	854.08	2648.02	1.632	1.632	3.1	PPP-PPP		2.3	1	0.0168	0.0168		0.0011		aryl hydrocarbon receptor	gga.3264	373907	AHR	NM_204118.1	6355 // regulation of transcription, DNA-dependent // inferred from electronic annotation /// 7165 // signal transduction // inferred from electronic annotation /// 45449 // regulation of transcription // inferred from electronic annotation	5634 // nucleus // inferred from electronic annotation	4871 // signal transducer activity // inferred from electronic annotation /// 4872 // receptor activity // inferred from electronic annotation /// 30528 // transcription regulator activity // inferred from electronic annotation
Gga.7228.1.S1_at	75.54	233.41	1.628	1.628	3.09	PAA-PPP		2.3	1	0.0168	0.0168		0		similar to Hypothetical protein MGC76315	gga.7228	420928	LOC420928	BX930076.2	---	---	---
Gga.8948.1.S1_s_at	75.27	232.46	1.627	1.627	3.088	PAP-PPP		2.3	1	0.0168	0.0168		0.0011		Sulf1 mRNA, complete sequence	gga.8948	---	---	AY313954.1	---	---	---
Gga.9143.1.S1_x_at	3780.88	11670	1.626	1.626	3.087	PPP-PPP		2.3	1	0.0168	0.0168		0.0012		Gga.9143.1.S1_x_at	---	---	---	AL585779	---	---	---
Gga.276.1.S1_at	325.8	996.17	1.612	1.612	3.058	PPP-PPP		2.3	1	0.0168	0.0168		0.0002		early B-cell factor	gga.276	395512	EBF	NM_204752.1	6355 // regulation of transcription, DNA-dependent // inferred from electronic annotation	5634 // nucleus // inferred from electronic annotation	3677 // DNA binding // inferred from electronic annotation
GgaAffx.24643.1.S1_at	696.17	2107.88	1.598	1.598	3.028	PPP-PPP		2.3	1	0.0168	0.0168		0.0005		GgaAffx.24643.1.S1_at
GgaAffx.10647.3.S1_s_at	160.88	483.79	1.588	1.588	3.007	PMP-PPP		2.3	1	0.0168	0.0168		0.0007		GgaAffx.10647.3.S1_s_at
Gga.7692.2.S1_a_at	841.62	2530.41	1.588	1.588	3.007	PPP-PPP		2.3	1	0.0168	0.0168		0.0031		transgelin 3	gga.7692	418420	TAGLN3	BU118543	---	---	---
Gga.6267.1.S1_at	307.09	919.28	1.582	1.582	2.993	PPP-PPP		2.3	1	0.0168	0.0168		0.003		stomatin	gga.6267	417118	STOM	BX263521	---	---	---
GgaAffx.8074.1.S1_at	299.43	895.59	1.581	1.581	2.991	PPA-PPP		1.5	7	0.0444	0.1043		0.018		similar to ADAM 12	---	425843	LOC425843	ENSGALT00000020791.1	---	---	---
GgaAffx.5776.2.S1_at	464.83	1385.84	1.576	1.576	2.981	PPP-PPP		2.1	2	0.0198	0.0347		0.0055		similar to cortactin binding protein 2; cortactin-binding protein 2; chromosome 7 open reading frame 8	---	417766	LOC417766	ENSGALT00000014874.1	---	---	---
Gga.3330.1.S1_at	587.3	1749.8	1.575	1.575	2.979	PPP-PPP		2.3	1	0.0168	0.0168		0.0002		spondin 1, extracellular matrix protein	gga.3330	395657	SPON1	NM_204851.1	7155 // cell adhesion // inferred from electronic annotation /// 7275 // development // inferred from electronic annotation	5578 // extracellular matrix (sensu Metazoa) // inferred from electronic annotation	5515 // protein binding // inferred from electronic annotation
GgaAffx.20867.1.S1_s_at	711.2	2118.13	1.574	1.574	2.978	PPP-PPP		2.3	1	0.0168	0.0168		0.0001		GgaAffx.20867.1.S1_s_at
Gga.6962.1.S1_at	111.92	332.87	1.572	1.572	2.974	PPA-PPP		1.7	5	0.0332	0.0648		0.012		transmembrane 7 superfamily member 1 (upregulated in kidney)	gga.6962	421511	TM7SF1	CN237285	---	---	---
GgaAffx.2789.1.S1_at	473.33	1407.16	1.572	1.572	2.973	PPP-PPP		2.3	1	0.0168	0.0168		0.0004		similar to betaine homocysteine methyl transferase	---	416371	LOC416371	ENSGALT00000007194.1	---	---	---
Gga.13441.1.S1_x_at	1227.53	3611.06	1.557	1.557	2.942	PPP-PPP		2.3	1	0.0168	0.0168		0.0006		Finished cDNA, clone ChEST40a19	gga.13441	---	---	BU394918	---	---	---
Gga.2253.1.S1_at	104.22	306.6	1.557	1.557	2.942	AAP-PPP		1.3	9	0.0579	0.1141		0.0254		similar to hypothetical protein DKFZp566N034	---	424287	LOC424287	BU339806	---	---	---
Gga.19261.1.S1_s_at	42.9	125.97	1.554	1.554	2.936	AAA-APA		1.9	3	0.0236	0.0372		0.0066		Finished cDNA, clone ChEST871e5	gga.19644	---	---	BU394186	---	---	---
GgaAffx.2399.2.S1_at	90	263.59	1.55	1.55	2.929	AAA-PPP		2.1	2	0.0198	0.0347		0.0053		similar to transient receptor potential cation channel, subfamily M, member 1; melastatin 1	---	427494	LOC427494	ENSGALT00000006114.1	---	---	---
GgaAffx.400.1.S1_at	33.6	98.05	1.545	1.545	2.918	AAA-APP		1.2	10	0.0697	0.1207		0.0329		LOC427564	---	427564	LOC427564	ENSGALT00000000896.1	---	---	---
Gga.9637.2.S1_a_at	232.61	678.61	1.545	1.545	2.917	PPP-PPP		2.1	2	0.0198	0.0347		0.0062		Finished cDNA, clone ChEST667h22	gga.9637	---	---	BX929865.1	---	---	---
Gga.9574.1.S1_at	470.97	1372.82	1.543	1.543	2.915	PPA-PPP		1.8	4	0.0277	0.0556		0.0107		similar to enhancer of split related protein-7	gga.9574	419390	LOC419390	BU400060	---	---	---
Gga.19258.1.S1_at	36.97	106.88	1.531	1.531	2.891	PAP-PPP		1.2	10	0.0697	0.1207		0.0317		Finished cDNA, clone ChEST970j8	gga.19258	---	---	BU115125	---	---	---
Gga.2154.1.S1_at	106.15	306.31	1.529	1.529	2.886	PPP-PPP		2.3	1	0.0168	0.0168		0.0013		Finished cDNA, clone ChEST794n20	gga.2154	---	---	BU379404	---	---	---
GgaAffx.5776.1.S1_s_at	341.71	985.96	1.529	1.529	2.885	AAA-PPP		2.3	1	0.0168	0.0168		0.0022		GgaAffx.5776.1.S1_s_at
GgaAffx.5611.1.S1_at	243.16	700.91	1.527	1.527	2.883	AAA-PPP		2.3	1	0.0168	0.0168		0.0021		similar to ceramide kinase-like	---	424120	LOC424120	ENSGALT00000014491.1	---	---	---
Gga.16449.1.S1_at	245.58	707.42	1.526	1.526	2.881	PPP-PPP		1.7	5	0.0332	0.0648		0.0115		Finished cDNA, clone ChEST1038b12	gga.16449	---	---	BU455377	---	---	---
GgaAffx.7825.1.S1_at	309.75	884.96	1.515	1.515	2.857	PPP-PPP		2.3	1	0.0168	0.0168		0.0007		similar to RIKEN cDNA D130067I03	---	424297	LOC424297	ENSGALT00000020191.1	---	---	---
GgaAffx.21118.1.S1_at	1085.26	3095.89	1.512	1.512	2.853	PPP-PPP		2.3	1	0.0168	0.0168		0.0002		GgaAffx.21118.1.S1_at
Gga.3682.1.S1_at	124.64	352.13	1.498	1.498	2.825	PMP-PPP		2.1	2	0.0198	0.0347		0.0046		retinol binding protein 2, cellular	gga.3682	374105	RBP2	NM_204255.1	---	16020 // membrane // inferred from electronic annotation	---
Gga.16179.1.S1_at	143.99	406.73	1.498	1.498	2.825	PAA-PPP		1.2	10	0.0697	0.1207		0.0372		Finished cDNA, clone ChEST115g14	gga.16179	---	---	CR386312.1	---	---	---
Gga.1607.1.S1_at	1210	3416.25	1.497	1.497	2.823	PPP-PPP		2.3	1	0.0168	0.0168		0.0002		Finished cDNA, clone ChEST191i4	gga.1607	---	---	BU442842	---	---	---
GgaAffx.8079.2.S1_s_at	123.06	346.95	1.495	1.495	2.819	AAA-PPP		1.8	4	0.0277	0.0556		0.01		GgaAffx.8079.2.S1_s_at
GgaAffx.383.1.S1_at	117.95	332.01	1.493	1.493	2.815	AAA-PMP		2.1	2	0.0198	0.0347		0.0048		similar to RIKEN cDNA 2610200G18	---	419555	LOC419555	ENSGALT00000000845.1	---	---	---
GgaAffx.22999.1.S1_s_at	4365.06	12276.2	1.492	1.492	2.812	PPP-PPP		2.3	1	0.0168	0.0168		0.0011		GgaAffx.22999.1.S1_s_at
GgaAffx.21308.1.S1_at	727.55	2041.6	1.489	1.489	2.806	PPP-PPP		2.3	1	0.0168	0.0168		0.0004		GgaAffx.21308.1.S1_at
Gga.4090.1.S1_a_at	175.62	492.48	1.488	1.488	2.804	AAA-PPA		1.8	4	0.0277	0.0556		0.0101		troponin T type 3 (skeletal, fast)	gga.4090	395761	TNNT3	NM_204922.1	7517 // muscle development // inferred from electronic annotation	---	---
Gga.9482.1.S1_at	342.63	953.65	1.477	1.477	2.783	PPA-PPP		2.3	1	0.0168	0.0168		0.0014		prepro-urotensin II-related peptide	gga.9482	404534	LOC404534	NM_206989.1	---	5576 // extracellular region // inferred from electronic annotation	5179 // hormone activity // inferred from electronic annotation
GgaAffx.5039.1.S1_at	350.01	971.44	1.473	1.473	2.775	PPP-PPP		2.3	1	0.0168	0.0168		0		similar to KIAA0925 protein	---	415561	LOC415561	ENSGALT00000013051.1	---	---	---
Gga.4965.1.S1_at	168.35	456.7	1.44	1.44	2.713	AAA-PPP		2.3	1	0.0168	0.0168		0.0016		collagen type XII alpha 1 chain /// collagen, type XII, alpha 1	gga.4965	395875 /	LOC395875 /// COL12A1	D00824.1	6817 // phosphate transport // inferred from electronic annotation /// 7155 // cell adhesion // inferred from electronic annotation	5578 // extracellular matrix (sensu Metazoa) // inferred from electronic annotation /// 5737 // cytoplasm // inferred from electronic annotation	5198 // structural molecule activity // inferred from electronic annotation /// 5515 // protein binding // inferred from electronic annotation
Gga.3427.1.S1_at	1050.06	2842.74	1.437	1.437	2.707	PPP-PPP		2.1	2	0.0198	0.0347		0.0047		ELAV (embryonic lethal, abnormal vision, Drosophila)-like 4 (Hu antigen D)	gga.3427	395634	ELAVL4	NM_204830.1	---	---	166 // nucleotide binding // inferred from electronic annotation /// 3676 // nucleic acid binding // inferred from electronic annotation /// 3723 // RNA binding // inferred from electronic annotation
Gga.11380.1.S1_at	264.48	715.82	1.436	1.436	2.706	PPP-PPP		2.3	1	0.0168	0.0168		0.0023		similar to FRMD3 protein	gga.11380	427452	LOC427452	BX933020.1	---	---	---
GgaAffx.20483.1.S1_at	574.83	1554.52	1.435	1.435	2.704	PPP-PPP		1.4	8	0.0503	0.0865		0.0219		GgaAffx.20483.1.S1_at
GgaAffx.8722.1.S1_at	53.41	144.26	1.434	1.434	2.701	PAA-PPP		1.4	8	0.0503	0.0865		0.0199		similar to NEW1 domain containing protein	---	421653	LOC421653	ENSGALT00000022265.1	---	---	---
Gga.14563.1.A1_at	33.4	89.7	1.425	1.425	2.686	AAA-PAP		1.1	11	0.0812	0.1412		0.0437		Finished cDNA, clone ChEST51n4	gga.14563	---	---	CR387571.1	---	---	---
Gga.2432.1.S1_at	113.38	304.28	1.424	1.424	2.684	AAA-PPP		2.3	1	0.0168	0.0168		0.0001		Gga.2432.1.S1_at	---	---	---	AL587463	---	---	---
GgaAffx.24545.1.S1_at	586.14	1571.1	1.422	1.422	2.68	PPP-PPP		2.3	1	0.0168	0.0168		0.0026		GgaAffx.24545.1.S1_at
GgaAffx.10059.1.S1_at	179.26	480.51	1.422	1.422	2.68	PPM-PPP		1.7	5	0.0332	0.0648		0.0114		GgaAffx.10059.1.S1_at
GgaAffx.1237.1.S1_at	56.57	151.41	1.42	1.42	2.676	PPM-PPP		1.9	3	0.0236	0.0372		0.0066		similar to glutamate receptor delta-1 chain precursor - mouse	---	428934	LOC428934	ENSGALT00000002923.1	---	---	---
Gga.2640.1.S1_at	185.24	493.58	1.414	1.414	2.665	PAA-PPP		1.8	4	0.0277	0.0556		0.0091		cripto, FRL-1, cryptic family 1	gga.2640	395437	CFC1	AF282984.1	---	---	---
Gga.1325.1.S1_at	1343.5	3566.84	1.409	1.409	2.655	PPP-PPP		2.3	1	0.0168	0.0168		0.0008		testis derived transcript (3 LIM domains)	gga.1325	395332	TES	NM_204623.1	---	---	8270 // zinc ion binding // inferred from electronic annotation /// 46872 // metal ion binding // inferred from electronic annotation
Gga.13051.1.S1_at	134.87	356.07	1.401	1.401	2.64	MAA-PPP		2.3	1	0.0168	0.0168		0.0032		Finished cDNA, clone ChEST539n4	gga.13051	---	---	BU115812	---	---	---
Gga.3250.1.S1_at	53.2	140.43	1.4	1.4	2.64	AAA-PPP		1.2	10	0.0697	0.1207		0.0308		visinin-like 1	gga.3250	396189	VSNL1	NM_205255.1	---	---	5509 // calcium ion binding // inferred from electronic annotation
Gga.11971.2.S1_at	12.7	33.49	1.399	1.399	2.637	AAA-PAA		1.1	11	0.0812	0.1412		0.0365		Similar to zinc finger protein, subfamily 1A, 5; zinc finger transcription factor Pegasus; zinc finger protein, subfamily 1A, 5 (Pegasus)	gga.11971	430882	---	CR405724.1	---	5634 // nucleus // inferred from electronic annotation	3676 // nucleic acid binding // inferred from electronic annotation /// 3677 // DNA binding // inferred from electronic annotation /// 8270 // zinc ion binding // inferred from electronic annotation /// 46872 // metal ion binding // inferred from electroni
Gga.15819.1.S1_s_at	158	416.21	1.397	1.397	2.634	AAA-PPP		1.9	3	0.0236	0.0372		0.0081		Finished cDNA, clone ChEST292c23	gga.15819	---	---	BU353321	---	---	---
GgaAffx.10134.1.S1_at	71.65	188.38	1.395	1.395	2.629	PAA-PPP		1.6	6	0.0361	0.0591		0.0137		GgaAffx.10134.1.S1_at
GgaAffx.21308.1.S1_s_at	822.11	2158.38	1.393	1.393	2.625	PPP-PPP		2.3	1	0.0168	0.0168		0		GgaAffx.21308.1.S1_s_at
Gga.2875.2.S1_a_at	357.22	936.62	1.391	1.391	2.622	PPP-PPP		1.6	6	0.0361	0.0591		0.014		activin A receptor, type I	gga.2875	395246	ACVR1	U38622.1	6468 // protein amino acid phosphorylation // inferred from electronic annotation /// 7178 // transmembrane receptor protein serine/threonine kinase signaling pathway // inferred from electronic annotation	16020 // membrane // inferred from electronic annotation /// 16021 // integral to membrane // inferred from electronic annotation	166 // nucleotide binding // inferred from electronic annotation /// 4672 // protein kinase activity // inferred from electronic annotation /// 4674 // protein serine/threonine kinase activity // inferred from electronic annotation /// 4675 // transmembran
Gga.6761.1.S1_at	193.97	507.7	1.388	1.388	2.617	PPP-PPP		2.3	1	0.0168	0.0168		0.0004		Gga.6761.1.S1_at	---	---	---	BX268097	---	---	---
Gga.7859.1.S1_at	671.17	1756.6	1.388	1.388	2.617	PPP-PPP		2.3	1	0.0168	0.0168		0.0018		Finished cDNA, clone ChEST428n3	gga.7859	---	---	BU261487	---	---	---
Gga.13457.1.S1_at	161.97	423.58	1.387	1.387	2.615	PAP-PPP		1.7	5	0.0332	0.0648		0.0115		Finished cDNA, clone ChEST294n4	gga.13457	---	---	BU139783	---	---	---
Gga.10477.1.S1_at	56.11	146.62	1.386	1.386	2.613	PPA-PPP		1.3	9	0.0579	0.1141		0.0283		Tumor necrosis factor receptor superfamily, member 19	gga.10477	418943	---	BX931334.2	---	---	---
Gga.6311.1.S1_at	1626.58	4241.41	1.383	1.383	2.608	PPP-PPP		2.3	1	0.0168	0.0168		0.0006		similar to Hairy/enhancer-of-split related with YRPW motif 1 (Hairy and enhancer of split related-1) (HESR-1) (Cardiovascular helix-loop-helix factor 2) (HES-related repressor protein 2 HERP2)	---	428365	LOC428365	BU464340	---	---	---
Gga.11144.1.S1_s_at	302.37	788.62	1.383	1.383	2.608	PPP-PPP		2.1	2	0.0198	0.0347		0.0047		similar to cortactin binding protein 2; cortactin-binding protein 2; chromosome 7 open reading frame 8	---	417766	LOC417766	BU418197	---	---	---
GgaAffx.1527.1.S1_at	345.38	899.07	1.38	1.38	2.603	PPM-PPP		2.3	1	0.0168	0.0168		0.0004		similar to KIAA1913 protein	---	427076	LOC427076	ENSGALT00000003584.1	---	---	---
Gga.3419.1.S1_at	162.3	422.15	1.379	1.379	2.601	PPP-PPP		2.3	1	0.0168	0.0168		0.0022		similar to neurexin III	---	423387	LOC423387	BU446135	---	---	---
GgaAffx.23309.1.S1_at	230.51	598.64	1.377	1.377	2.597	PPP-PPP		2.3	1	0.0168	0.0168		0.0002		GgaAffx.23309.1.S1_at
Gga.19308.1.S1_at	45.85	119.05	1.377	1.377	2.596	AAA-PPP		1.1	11	0.0812	0.1412		0.0366		Finished cDNA, clone ChEST577l24	gga.19308	---	---	BU120352	---	---	---
GgaAffx.896.1.S1_at	38.92	100.92	1.375	1.375	2.593	PAA-PPA		1.6	6	0.0361	0.0591		0.0137		similar to l(3)mbt-like 3	---	419599	LOC419599	ENSGALT00000002054.1	---	---	---
Gga.51.1.S1_at	360.22	931.73	1.371	1.371	2.587	PPA-PPP		1.8	4	0.0277	0.0556		0.0095		butyrylcholinesterase	gga.51	395358	BCHE	NM_204646.1	---	---	3824 // catalytic activity // inferred from electronic annotation /// 4104 // cholinesterase activity // inferred from electronic annotation /// 4759 // serine esterase activity // inferred from electronic annotation /// 16787 // hydrolase activity // infe
Gga.6508.1.A1_at	244.31	628.89	1.364	1.364	2.574	AAA-PPP		2.3	1	0.0168	0.0168		0.0005		similar to Alpha-galactosidase A precursor (Melibiase) (Alpha-D-galactoside galactohydrolase) (Alpha-D-galactosidase A) (Agalsidase alfa)	gga.16916	422188	LOC422188	BX270227	---	---	---
Gga.18226.1.S1_s_at	35.76	91.96	1.362	1.362	2.571	AAA-AAP		1.6	6	0.0361	0.0591		0.0129		similar to leucine rich repeat and death domain containing protein isoform 1; leucine-rich and death domain containing	---	426464	LOC426464	CR390003.1	---	---	---
Gga.8352.1.S1_at	230.68	591.73	1.359	1.359	2.565	PPP-PPP		2.3	1	0.0168	0.0168		0.0001		similar to laminin alpha 2 subunit precursor; laminin M; merosin heavy chain	---	421707	LOC421707	BX276864	---	---	---
GgaAffx.11680.1.S1_s_at	32.74	83.99	1.359	1.359	2.565	PAP-PPP		1.5	7	0.0444	0.1043		0.0167		GgaAffx.11680.1.S1_s_at
Gga.4988.1.S1_at	942.68	2416.72	1.358	1.358	2.564	PPP-PPP		2.3	1	0.0168	0.0168		0.0012		caldesmon 1	gga.4988	373965	CALD1	NM_204158.1	6936 // muscle contraction // inferred from electronic annotation /// 7517 // muscle development // inferred from electronic annotation	---	3779 // actin binding // inferred from electronic annotation /// 5516 // calmodulin binding // inferred from electronic annotation /// 17022 // myosin binding // inferred from electronic annotation
Gga.1941.1.S2_at	516.12	1321.63	1.357	1.357	2.561	PPP-PPP		2.3	1	0.0168	0.0168		0.0014		frizzled homolog 4 (Drosophila)	gga.1941	373887	FZD4	BU232804	7165 // signal transduction // inferred from electronic annotation /// 7166 // cell surface receptor linked signal transduction // inferred from electronic annotation /// 7186 // G-protein coupled receptor protein signaling pathway // inferred from electro	16020 // membrane // inferred from electronic annotation /// 16021 // integral to membrane // inferred from electronic annotation	4871 // signal transducer activity // inferred from electronic annotation /// 4872 // receptor activity // inferred from electronic annotation /// 4926 // non-G-protein coupled 7TM receptor activity // inferred from electronic annotation /// 4930 // G-prot
Gga.14707.1.S1_at	73.92	189.05	1.355	1.355	2.558	PAA-PPP		1.4	8	0.0503	0.0865		0.0224		Finished cDNA, clone ChEST481n23	gga.14707	---	---	CR387108.1	---	---	---
Gga.183.1.S1_at	211.19	540.11	1.355	1.355	2.557	PAA-PPP		2.3	1	0.0168	0.0168		0.0002		UDP glycosyltransferase 8 (UDP-galactose ceramide galactosyltransferase)	gga.183	374033	UGT8	NM_204204.1	8152 // metabolism // inferred from electronic annotation	---	16740 // transferase activity // inferred from electronic annotation /// 16757 // transferase activity, transferring glycosyl groups // inferred from electronic annotation /// 16758 // transferase activity, transferring hexosyl groups // inferred from elec
Gga.645.1.S1_at	145.1	370.15	1.351	1.351	2.551	PAA-PPP		2.1	2	0.0198	0.0347		0.0044		SKI-like	gga.645	396087	SKIL	NM_205174.1	---	5634 // nucleus // inferred from electronic annotation	---
Gga.17026.1.S1_at	217.28	553.85	1.35	1.35	2.549	MAA-PPP		2.3	1	0.0168	0.0168		0.0019		Finished cDNA, clone ChEST631b1	gga.17026	---	---	BU306949	---	---	---
GgaAffx.5308.1.S1_s_at	176.31	448.08	1.346	1.346	2.542	PPP-PPP		2.3	1	0.0168	0.0168		0.0032		GgaAffx.5308.1.S1_s_at
Gga.2913.1.S1_at	408.2	1037.81	1.346	1.346	2.542	PPP-PPP		2.3	1	0.0168	0.0168		0.0036		myelin basic protein	gga.2913	396217	MBP	NM_205280.1	---	---	5198 // structural molecule activity // inferred from electronic annotation /// 19911 // structural constituent of myelin sheath // inferred from electronic annotation
GgaAffx.6805.1.A1_at	160.89	408.75	1.345	1.345	2.541	AAA-PPP		1.2	10	0.0697	0.1207		0.0296		GgaAffx.6805.1.A1_at	---	---	---	ENSGALT00000017528.1	---	---	---
Gga.1445.1.S1_at	393.69	998.68	1.343	1.343	2.537	PMA-PPP		2.3	1	0.0168	0.0168		0.0032		Transcribed locus	gga.1445	---	---	AL584203	---	---	---
GgaAffx.7289.1.S1_at	81.4	205.11	1.333	1.333	2.52	AAA-PMA		1.7	5	0.0332	0.0648		0.0118		similar to phosphodiesterase 10A	---	421574	LOC421574	ENSGALT00000018743.1	---	---	---
GgaAffx.21300.1.S1_at	669.65	1683.06	1.33	1.33	2.513	PPA-PPP		1.6	6	0.0361	0.0591		0.014		GgaAffx.21300.1.S1_at
GgaAffx.22984.1.S1_x_at	672.29	1689.22	1.329	1.329	2.513	AAA-MPA		1.1	11	0.0812	0.1412		0.0356		GgaAffx.22984.1.S1_x_at
Gga.3607.1.S1_a_at	588.33	1476.52	1.328	1.328	2.51	PPP-PPP		2.3	1	0.0168	0.0168		0.0016		Collagen alpha 2(I) chain precursor	gga.3607	396243	LOC396243	M33383.1	6817 // phosphate transport // inferred from electronic annotation	5578 // extracellular matrix (sensu Metazoa) // inferred from electronic annotation /// 5581 // collagen // inferred from electronic annotation /// 5737 // cytoplasm // inferred from electronic annotation	5198 // structural molecule activity // inferred from electronic annotation /// 5201 // extracellular matrix structural constituent // inferred from electronic annotation
Gga.2772.1.S1_a_at	217.58	545.24	1.325	1.325	2.506	PPP-PPP		2.3	1	0.0168	0.0168		0.0032		SNF1-like kinase	gga.2833	395417	LOC395417	CN235700	46626 // regulation of insulin receptor signaling pathway // inferred from sequence or structural similarity /// 6468 // protein amino acid phosphorylation // inferred from direct assay /// 7243 // protein kinase cascade // inferred from direct assay /// 6	5737 // cytoplasm // inferred from sequence or structural similarity /// 5737 // cytoplasm // inferred from direct assay	287 // magnesium ion binding // inferred from direct assay /// 4674 // protein serine/threonine kinase activity // inferred from direct assay /// 5524 // ATP binding // inferred from direct assay /// 166 // nucleotide binding // inferred from electronic an
Gga.13787.1.S1_at	192.23	480.97	1.323	1.323	2.502	PMP-PPP		1.4	8	0.0503	0.0865		0.0214		Finished cDNA, clone ChEST1009k15	gga.13787	---	---	CR338689.1	---	---	---
Gga.4524.1.S1_at	198.12	495.01	1.321	1.321	2.499	PPP-PPP		1.4	8	0.0503	0.0865		0.0183		Finished cDNA, clone ChEST809k24	gga.4524	---	---	BU268111	---	---	---
GgaAffx.21864.2.S1_s_at	183.71	455.6	1.31	1.31	2.48	PPP-PPP		1.7	5	0.0332	0.0648		0.01		GgaAffx.21864.2.S1_s_at
Gga.3133.2.S1_a_at	2977.56	7376.89	1.309	1.309	2.477	PPP-PPP		2.3	1	0.0168	0.0168		0.0017		collapsin response mediator protein 1	gga.3133	395156	CRMP1	AF301547.1	---	---	16787 // hydrolase activity // inferred from electronic annotation
GgaAffx.25630.2.S1_s_at	284.91	704.49	1.306	1.306	2.473	PPP-PPP		1.5	7	0.0444	0.1043		0.0149		GgaAffx.25630.2.S1_s_at
Gga.19618.1.S1_at	225.65	555.72	1.3	1.3	2.463	PAA-PPP		1.9	3	0.0236	0.0372		0.0075		Finished cDNA, clone ChEST844g23	gga.19618	---	---	BU319587	---	---	---
GgaAffx.23757.5.S1_s_at	324.68	796.94	1.295	1.295	2.455	PPA-PPP		1.3	9	0.0579	0.1141		0.0242
Gga.254.1.S1_at	80.56	197.43	1.293	1.293	2.451	MAM-PPP		1.4	8	0.0503	0.0865		0.0193		potassium inwardly-rectifying channel, subfamily J, member 2	gga.254	396328	KCNJ2	NM_205370.1	6810 // transport // inferred from electronic annotation /// 6811 // ion transport // inferred from electronic annotation /// 6813 // potassium ion transport // inferred from electronic annotation	16020 // membrane // inferred from electronic annotation /// 16021 // integral to membrane // inferred from electronic annotation	5216 // ion channel activity // inferred from electronic annotation /// 5242 // inward rectifier potassium channel activity // inferred from electronic annotation /// 5244 // voltage-gated ion channel activity // inferred from electronic annotation /// 526
Gga.6245.2.S1_at	3497.03	8560.2	1.292	1.292	2.448	PPP-PPP		1.3	9	0.0579	0.1141		0.0229		Transcribed locus, strongly similar to XP_420703.1 PREDICTED: similar to hypothetical protein FLJ13352 [Gallus gallus]	gga.6245	---	---	BU422408	---	---	---
Gga.13266.1.S1_a_at	285.83	699.4	1.291	1.291	2.447	PAP-PPP		2.3	1	0.0168	0.0168		0.0032		Finished cDNA, clone ChEST398e11	gga.13266	---	---	BU118374	---	---	---
Gga.14466.1.S1_at	124.23	303.91	1.291	1.291	2.446	PAA-PPP		2.3	1	0.0168	0.0168		0.0003		Finished cDNA, clone ChEST320b12	gga.14466	---	---	BU264064	---	---	---
Gga.19269.1.S1_at	53.86	131.6	1.289	1.289	2.443	AAP-MAM		1.9	3	0.0236	0.0372		0.0076		Finished cDNA, clone ChEST734o14	gga.19269	---	---	BU240046	---	---	---
Gga.5879.1.S1_at	47.75	116.54	1.287	1.287	2.441	AAA-PPP		1.2	10	0.0697	0.1207		0.0278		Finished cDNA, clone ChEST172c9	gga.5879	---	---	BX265287	---	---	---
Gga.9093.3.S1_a_at	507.4	1237.83	1.287	1.287	2.44	AMA-PPP		1.7	5	0.0332	0.0648		0.0119		drebrin 1	gga.9093	396496	DBN1	CR388663.1	7275 // development // inferred from electronic annotation /// 7399 // nervous system development // inferred from electronic annotation /// 30154 // cell differentiation // inferred from electronic annotation	5622 // intracellular // inferred from electronic annotation	3779 // actin binding // inferred from electronic annotation
Gga.7666.1.S1_at	551.89	1345.81	1.286	1.286	2.439	AAA-PPP		2.3	1	0.0168	0.0168		0.0037		kinesin Kif5c	gga.7666	408046	KIF5C	CN224698	---	---	---
Gga.34.1.S1_at	218.93	532.93	1.283	1.283	2.434	PPA-PPP		2.3	1	0.0168	0.0168		0.0009		calcium channel, voltage-dependent, gamma subunit 4	gga.34	373924	CACNG4	NM_204132.1	6816 // calcium ion transport // inferred from electronic annotation	5923 // tight junction // inferred from electronic annotation /// 16020 // membrane // inferred from electronic annotation /// 16021 // integral to membrane // inferred from electronic annotation	5198 // structural molecule activity // inferred from electronic annotation /// 5245 // voltage-gated calcium channel activity // inferred from electronic annotation
Gga.5008.1.S1_at	111.67	271.15	1.28	1.28	2.428	APP-PPP		1.9	3	0.0236	0.0372		0.006		ARF tumor suppressor	gga.5008	395077	LOC395077	NM_204434.1	---	---	---
Gga.19434.1.S1_at	157.56	382.27	1.279	1.279	2.426	PPP-PPP		2.3	1	0.0168	0.0168		0.0021		Finished cDNA, clone ChEST955o8	gga.19434	---	---	BU246610	---	---	---
Gga.14955.1.A1_at	80.45	194.48	1.273	1.273	2.417	AAA-PAP		2.3	1	0.0168	0.0168		0.0025		Finished cDNA, clone ChEST732g9	gga.14955	---	---	CR386336.1	---	---	---
Gga.19447.2.S1_s_at	1245.17	3007.81	1.272	1.272	2.416	PPP-PPP		1.5	7	0.0444	0.1043		0.0169		Finished cDNA, clone ChEST169g8	gga.19447	---	---	BX934495.2	---	---	---
GgaAffx.5686.1.S1_at	83.58	201.88	1.272	1.272	2.415	AAA-PPP		1.9	3	0.0236	0.0372		0.0059		similar to KIAA1914 protein	---	423908	LOC423908	ENSGALT00000014639.1	---	---	---
Gga.13008.1.S1_at	2024.5	4863.86	1.265	1.265	2.403	PPP-PPP		1.9	3	0.0236	0.0372		0.0072		Finished cDNA, clone ChEST11k17	gga.13008	---	---	CR353534.1	---	---	---
Gga.10881.1.S1_s_at	234.61	563.18	1.263	1.263	2.4	PPP-PPP		2.3	1	0.0168	0.0168		0.0006		similar to Serine/threonine-protein kinase PAK 1 (p21-activated kinase 1) (PAK-1) (P68-PAK) (Alpha-PAK) (Protein kinase MUK2)	---	419083	LOC419083	BU258477	---	---	---
Gga.3140.1.A1_s_at	90.63	216.42	1.256	1.256	2.388	AAA-PMP		2.3	1	0.0168	0.0168		0.0005		similar to KIAA0960 protein	---	420584	LOC420584	BU321851	---	---	---
Gga.4097.1.S1_at	1890.26	4514.59	1.256	1.256	2.388	PPP-PPP		2.3	1	0.0168	0.0168		0.003		microtubule-associated protein 2	gga.4097	424001	MAP2	BU226244	---	---	---
GgaAffx.21698.1.S1_at	65.35	156.04	1.256	1.256	2.388	PAA-APM		1.5	7	0.0444	0.1043		0.0168
Gga.7567.1.S1_s_at	536.44	1280.32	1.255	1.255	2.387	PPP-PPP		2.1	2	0.0198	0.0347		0.0046		Finished cDNA, clone ChEST914n3	gga.7567	---	---	BX277611	---	---	---
Gga.1839.1.S1_at	427.51	1020.22	1.255	1.255	2.386	PPP-PPP		1.7	5	0.0332	0.0648		0.0108		eyes absent homolog 2 (Drosophila)	gga.1839	395745	EYA2	NM_204915.1	6350 // transcription // inferred from electronic annotation /// 6355 // regulation of transcription, DNA-dependent // inferred from electronic annotation /// 7275 // development // inferred from electronic annotation /// 8152 // metabolism // inferred fro	5634 // nucleus // inferred from electronic annotation	287 // magnesium ion binding // inferred from electronic annotation /// 3824 // catalytic activity // inferred from electronic annotation /// 4721 // phosphoprotein phosphatase activity // inferred from electronic annotation /// 16787 // hydrolase activity
GgaAffx.23757.3.S1_s_at	102.64	244.49	1.252	1.252	2.382	AAA-PPP		1.4	8	0.0503	0.0865		0.0213
Gga.16061.1.S1_s_at	165.16	393.4	1.252	1.252	2.382	PAA-PPP		1.3	9	0.0579	0.1141		0.0231		Finished cDNA, clone ChEST383a17 /// Finished cDNA, clone ChEST64p24	gga.11700	---	---	BX933160.2	---	---	---
Gga.141.2.S1_a_at	545.69	1298.95	1.251	1.251	2.38	PPP-PPP		2.3	1	0.0168	0.0168		0.0015		nescient helix loop helix 1	gga.141	373910	NHLH1	AF086757.1	45449 // regulation of transcription // inferred from electronic annotation	5634 // nucleus // inferred from electronic annotation	30528 // transcription regulator activity // inferred from electronic annotation
Gga.16271.1.S1_at	530.93	1262.05	1.249	1.249	2.377	PPP-PPP		2.3	1	0.0168	0.0168		0.0007		Finished cDNA, clone ChEST73d22	gga.16271	---	---	BU285321	---	---	---
GgaAffx.11711.1.S1_s_at	212.53	503.62	1.245	1.245	2.37	PPP-PPP		2.3	1	0.0168	0.0168		0.0019		GgaAffx.11711.1.S1_s_at
GgaAffx.13038.1.S1_s_at	105.2	248.72	1.241	1.241	2.364	PAA-PPP		1.4	8	0.0503	0.0865		0.0174		GgaAffx.13038.1.S1_s_at
Gga.6197.1.S1_s_at	706.87	1667.43	1.238	1.238	2.359	PPP-PPP		2.1	2	0.0198	0.0347		0.0052		Finished cDNA, clone ChEST844g23	gga.19618	---	---	BU219922	---	---	---
Gga.12699.1.S1_at	367.78	866.64	1.237	1.237	2.356	PPP-PPP		2.3	1	0.0168	0.0168		0.0022		homeo box C9	gga.12699	425723	HOXC9	BU220759	---	---	---
Gga.17534.1.S1_at	182.31	429.44	1.236	1.236	2.356	AAA-PAA		1.3	9	0.0579	0.1141		0.0259		Finished cDNA, clone ChEST543j5	gga.17534	---	---	BU361240	---	---	---
Gga.854.1.S1_a_at	164.16	386.62	1.236	1.236	2.355	PPP-PPP		1.2	10	0.0697	0.1207		0.0314		lectin, galactoside-binding, soluble, 1 (galectin 1)	gga.854	396491	LGALS1	NM_205495.1	---	---	5529 // sugar binding // inferred from electronic annotation
Gga.13563.1.S1_at	175.96	414.12	1.235	1.235	2.353	AAA-PPP		2.3	1	0.0168	0.0168		0.0001		Finished cDNA, clone ChEST490d15	gga.13563	---	---	BU352275	---	---	---
Gga.11409.1.S1_at	80.89	189.84	1.231	1.231	2.347	APA-PPP		1.9	3	0.0236	0.0372		0.0062		adenylate cyclase activating polypeptide 1 (pituitary)	gga.616	408251	ADCYAP1	U71184.1	---	5576 // extracellular region // inferred from electronic annotation	5179 // hormone activity // inferred from electronic annotation
GgaAffx.25580.1.S1_s_at	996.59	2333.81	1.228	1.228	2.342	PPP-PPP		1.9	3	0.0236	0.0372		0.0056		GgaAffx.25580.1.S1_s_at
Gga.16448.1.S1_at	685.13	1603.67	1.227	1.227	2.341	PPP-PPP		2.1	2	0.0198	0.0347		0.0046		Finished cDNA, clone ChEST891n21	gga.16448	---	---	CR385354.1	---	---	---
GgaAffx.9719.1.S1_at	54.98	128.68	1.227	1.227	2.341	AAA-PAA		1.7	5	0.0332	0.0648		0.0101		similar to RIKEN cDNA 4930429M06Rik	---	427275	LOC427275	ENSGALT00000024621.1	---	---	---
GgaAffx.25120.1.A1_at	94.57	221.08	1.225	1.225	2.338	AAA-PPP		2.3	1	0.0168	0.0168		0		GgaAffx.25120.1.A1_at
Gga.4324.2.S1_a_at	216.15	505.01	1.224	1.224	2.336	AAA-PPP		2.3	1	0.0168	0.0168		0.0003		growth differentiation factor 3	gga.4324	396132	GDF3	CN217380	40007 // growth // inferred from electronic annotation	5576 // extracellular region // inferred from electronic annotation	8083 // growth factor activity // inferred from electronic annotation
Gga.14013.1.S1_s_at	1001.35	2336.09	1.222	1.222	2.333	PPP-PPP		1.9	3	0.0236	0.0372		0.0067		Finished cDNA, clone ChEST959a8	gga.19107	---	---	BU325195	---	---	---
GgaAffx.6286.3.S1_s_at	52.69	122.15	1.213	1.213	2.318	PAA-PPP		1.4	8	0.0503	0.0865		0.0193
GgaAffx.21118.1.S1_s_at	509.09	1178.88	1.211	1.211	2.316	PPP-PPP		2.3	1	0.0168	0.0168		0.0028
Gga.15966.1.S1_at	666.09	1540.46	1.21	1.21	2.313	PPP-PPP		2.1	2	0.0198	0.0347		0.0044		Finished cDNA, clone ChEST114i20	gga.15966	---	---	CR386300.1	---	---	---
Gga.16916.1.S1_at	62.08	143.4	1.208	1.208	2.31	AAA-PAP		1.3	9	0.0579	0.1141		0.022		similar to Alpha-galactosidase A precursor (Melibiase) (Alpha-D-galactoside galactohydrolase) (Alpha-D-galactosidase A) (Agalsidase alfa)	gga.16916	422188	LOC422188	BU458183	---	---	---
Gga.9941.1.S1_s_at	214.18	494.45	1.207	1.207	2.309	PMP-PPP		1.9	3	0.0236	0.0372		0.0052		similar to KIAA0960 protein	gga.9941	420585	LOC420585	BU262534	---	---	---
GgaAffx.24540.1.S1_s_at	179.87	413.86	1.202	1.202	2.301	PAP-PPP		2.3	1	0.0168	0.0168		0.0026		GgaAffx.24540.1.S1_s_at
Gga.19752.1.S1_at	104.75	240.8	1.201	1.201	2.299	AAA-PPA		2.3	1	0.0168	0.0168		0.0012		Finished cDNA, clone ChEST770a17	gga.19752	---	---	CR406677.1	---	---	---
GgaAffx.26088.2.S1_s_at	333.95	766.99	1.2	1.2	2.297	PPP-PPP		2.1	2	0.0198	0.0347		0.0035		GgaAffx.26088.2.S1_s_at
Gga.14667.1.S1_at	110.97	254.75	1.199	1.199	2.296	PAA-PAP		1.9	3	0.0236	0.0372		0.0058		Finished cDNA, clone ChEST775l6	gga.14667	---	---	CR387215.1	---	---	---
Gga.14296.1.S1_at	130.56	299.42	1.197	1.197	2.293	AAA-PPP		1.7	5	0.0332	0.0648		0.0096		Finished cDNA, clone ChEST427n15	gga.3862	---	---	BU459826	---	---	---
Gga.14013.1.S1_at	708.84	1622.54	1.195	1.195	2.289	PPP-PPP		1.9	3	0.0236	0.0372		0.0063		Finished cDNA, clone ChEST837f3	gga.14013	---	---	BU325195	---	---	---
Gga.7172.1.S1_at	885.78	2026.06	1.194	1.194	2.287	PPP-PPP		1.7	5	0.0332	0.0648		0.0095		Transcribed locus	gga.7172	---	---	BX277933	---	---	---
Gga.2884.1.S1_at	423.27	966.75	1.192	1.192	2.284	PPP-PPP		2.3	1	0.0168	0.0168		0.0013		Finished cDNA, clone ChEST583n1	gga.2884	---	---	CR388478.1	---	---	---
Gga.13593.1.S1_at	18.85	42.96	1.189	1.189	2.28	AAA-PAP		2.3	1	0.0168	0.0168		0.0019		Finished cDNA, clone ChEST203p10	gga.13593	---	---	BU452340	---	---	---
Gga.19372.1.S1_at	61.76	140.67	1.188	1.188	2.278	MPA-PPP		1.7	5	0.0332	0.0648		0.0108		Finished cDNA, clone ChEST766k21	gga.19372	---	---	CN222049	---	---	---
Gga.2712.1.S1_at	1753.55	3969.64	1.179	1.179	2.264	PPP-PPP		2.3	1	0.0168	0.0168		0.0017		LZ1	gga.2712	395251	LOC395251	NM_204565.1	7212 // dopamine receptor signaling pathway // inferred from electronic annotation	16021 // integral to membrane // inferred from electronic annotation	50780 // dopamine receptor binding // inferred from electronic annotation
Gga.19059.2.S1_a_at	470.09	1063.6	1.178	1.178	2.263	PPP-PPP		1.9	3	0.0236	0.0372		0.0049		Finished cDNA, clone ChEST988a14	gga.19059	---	---	CR406751.1	---	---	---
GgaAffx.20767.1.S1_s_at	707.22	1599.7	1.178	1.178	2.262	PPP-PPP		2.3	1	0.0168	0.0168		0.0003		GgaAffx.20767.1.S1_s_at
GgaAffx.10968.1.S1_at	93.99	212.06	1.174	1.174	2.256	AAA-PPA		1.1	11	0.0812	0.1412		0.0365		GgaAffx.10968.1.S1_at
GgaAffx.10256.1.S1_at	156.41	351.83	1.17	1.17	2.249	APA-PPP		2.3	1	0.0168	0.0168		0.0033		GgaAffx.10256.1.S1_at
GgaAffx.852.1.S1_at	87.51	196.3	1.165	1.165	2.243	AAA-PMP		1.2	10	0.0697	0.1207		0.0294		GgaAffx.852.1.S1_at	---	---	---	ENSGALT00000001947.1	---	---	---
Gga.4834.2.S1_at	107.36	240.66	1.164	1.164	2.242	PAP-PPP		2.3	1	0.0168	0.0168		0.0008		similar to clathryn light chain (LCA2)	---	427284	LOC427284	AL586460	---	---	---
Gga.15946.2.S1_a_at	450.08	1007.02	1.162	1.162	2.237	PPP-PPP		2.3	1	0.0168	0.0168		0.0024		similar to kinesin-related microtuble-based motor protein	---	424849	LOC424849	BU272346	---	---	---
Gga.2930.1.S1_at	439.74	982.31	1.16	1.16	2.234	PPP-PPP		1.8	4	0.0277	0.0556		0.0081		similar to RIKEN cDNA D930036F22 gene	---	423311	LOC423311	BU467036	---	---	---
Gga.4712.1.S1_a_at	480	1071.24	1.158	1.158	2.232	PPP-PPP		2.3	1	0.0168	0.0168		0.0024		3-oxoacid CoA transferase 1	gga.17826	427190	OXCT1	BX272991	8152 // metabolism // inferred from electronic annotation	---	8410 // CoA-transferase activity // inferred from electronic annotation
Gga.4988.2.S1_a_at	828.99	1847.99	1.157	1.157	2.229	PPP-PPP		2.3	1	0.0168	0.0168		0.0003		caldesmon 1	gga.4988	373965	CALD1	M28417.1	6936 // muscle contraction // inferred from electronic annotation /// 7517 // muscle development // inferred from electronic annotation	---	3779 // actin binding // inferred from electronic annotation /// 5516 // calmodulin binding // inferred from electronic annotation /// 17022 // myosin binding // inferred from electronic annotation
Gga.16806.4.S1_a_at	678.89	1512.41	1.156	1.156	2.228	PPP-PPP		2.3	1	0.0168	0.0168		0.0003		Homer homolog 3 (Drosophila)	gga.16806	420115	---	BU127262	---	---	---
Gga.5074.1.S1_at	69.68	155.13	1.155	1.155	2.226	AAA-PPP		1.1	11	0.0812	0.1412		0.0371		MRNA (clone 331)	gga.5074	---	---	X61196.1	---	---	---
Gga.46.3.S1_a_at	37.37	83.13	1.154	1.154	2.225	AAA-PAP		1.9	3	0.0236	0.0372		0.007		cer-d4	gga.46	395351	LOC395351	AF362755.1	6350 // transcription // inferred from electronic annotation /// 6355 // regulation of transcription, DNA-dependent // inferred from electronic annotation	5634 // nucleus // inferred from electronic annotation	3676 // nucleic acid binding // inferred from electronic annotation /// 5515 // protein binding // inferred from electronic annotation /// 8270 // zinc ion binding // inferred from electronic annotation /// 46872 // metal ion binding // inferred from elect
GgaAffx.4936.3.S1_s_at	206.79	459.81	1.153	1.153	2.224	PPA-PPP		1.8	4	0.0277	0.0556		0.0081		GgaAffx.4936.3.S1_s_at
Gga.17359.1.S1_at	69.94	155.39	1.152	1.152	2.222	AAA-PAP		1	12	0.0992	0.1959		0.0486		hypothetical gene supported by CR390900	gga.17359	422895	LOC422895	BU349252	---	---	---
Gga.4974.1.S1_at	814.44	1801.12	1.145	1.145	2.211	PPP-PPP		1.7	5	0.0332	0.0648		0.0095		proteoglycan	gga.4974	395565	PG-M	NM_204787.1	7155 // cell adhesion // inferred from electronic annotation	5578 // extracellular matrix (sensu Metazoa) // inferred from electronic annotation	5509 // calcium ion binding // inferred from electronic annotation /// 5529 // sugar binding // inferred from electronic annotation /// 5540 // hyaluronic acid binding // inferred from electronic annotation
Gga.790.1.S1_at	326.6	722.23	1.145	1.145	2.211	PPP-PPP		1.5	7	0.0444	0.1043		0.0148		domesticus (clone 1.6 kB) islet-2	gga.790	396382	ISLET-2	L35568.1	6355 // regulation of transcription, DNA-dependent // inferred from electronic annotation /// 7275 // development // inferred from electronic annotation /// 45449 // regulation of transcription // inferred from electronic annotation	5634 // nucleus // inferred from electronic annotation	3677 // DNA binding // inferred from electronic annotation /// 3700 // transcription factor activity // inferred from electronic annotation /// 8270 // zinc ion binding // inferred from electronic annotation /// 46872 // metal ion binding // inferred from
GgaAffx.1805.1.A1_at	178.51	393.71	1.141	1.141	2.206	PAP-PPP		1.1	11	0.0812	0.1412		0.0383		GgaAffx.1805.1.A1_at	---	---	---	ENSGALT00000004370.1	---	---	---
GgaAffx.8769.1.S1_at	210.35	463.88	1.141	1.141	2.205	AAA-PPA		2.3	1	0.0168	0.0168		0.0001		similar to cadherin 19, type 2 preproprotein	---	421029	LOC421029	ENSGALT00000022370.1	---	---	---
GgaAffx.23054.3.S1_s_at	147.78	325.73	1.14	1.14	2.204	PPM-PPP		1.6	6	0.0361	0.0591		0.0117		GgaAffx.23054.3.S1_s_at
GgaAffx.3719.1.S1_s_at	261.73	575.94	1.138	1.138	2.201	PPP-PPP		2.3	1	0.0168	0.0168		0.0003		GgaAffx.3719.1.S1_s_at
Gga.2330.1.S1_at	481.7	1058.3	1.136	1.136	2.197	PPP-PPP		1.5	7	0.0444	0.1043		0.0142		similar to Hypothetical protein CBG08970	---	415822	LOC415822	BU304608	---	---	---
Gga.17348.1.S1_s_at	326.3	716.1	1.134	1.134	2.195	PPP-PPP		2.1	2	0.0198	0.0347		0.0039		similar to Calcium/calmodulin-dependent protein kinase type II delta chain (CaM-kinase II delta chain) (CaM kinase II delta subunit) (CaMK-II delta subunit)	---	422688	LOC422688	BU275131	---	---	---
GgaAffx.23361.1.S1_at	174.85	383.73	1.134	1.134	2.195	PPA-PPP		1.8	4	0.0277	0.0556		0.0071		GgaAffx.23361.1.S1_at
Gga.12077.1.S1_at	788.98	1730.54	1.133	1.133	2.193	PPP-PPP		1.2	10	0.0697	0.1207		0.0271		solute carrier family 18 (vesicular acetylcholine), member 3	gga.12077	404302	SLC18A3	NM_206982.1	6810 // transport // inferred from electronic annotation	16021 // integral to membrane // inferred from electronic annotation	5215 // transporter activity // inferred from electronic annotation
Gga.13134.1.S1_at	78.57	172	1.13	1.13	2.189	PPM-PPP		2.3	1	0.0168	0.0168		0.0016		Finished cDNA, clone ChEST663o7	gga.13134	---	---	BU287429	---	---	---
Gga.269.1.S1_at	317.1	690.3	1.122	1.122	2.177	PPP-PPP		1.5	7	0.0444	0.1043		0.0141		runt-related transcription factor 1; translocated to, 1 (cyclin D-related)	gga.269	395503	RUNX1T1	NM_204744.1	6355 // regulation of transcription, DNA-dependent // inferred from electronic annotation	5634 // nucleus // inferred from electronic annotation	3700 // transcription factor activity // inferred from electronic annotation
GgaAffx.3257.1.S1_at	210.23	457.12	1.121	1.121	2.174	AAA-PPA		2.3	1	0.0168	0.0168		0.0003		similar to mitogen-activated protein kinase kinase kinase	gga.19399	415985	LOC415985	ENSGALT00000008375.1	---	---	---
GgaAffx.8497.2.S1_at	26.36	57.26	1.119	1.119	2.172	AAA-PAP		1.7	5	0.0332	0.0648		0.0095		similar to zinc finger protein Cezanne; cellular zinc finger anti-NF-kappaB Cezanne	---	426041	LOC426041	ENSGALT00000021782.1	---	---	---
Gga.203.1.S1_at	157.69	342.39	1.119	1.119	2.171	PAA-PPP		1.1	11	0.0812	0.1412		0.0325		synuclein, beta	gga.203	395391	SNCB	NM_204671.1	---	5737 // cytoplasm // inferred from electronic annotation	---
GgaAffx.25567.1.S1_at	975.84	2113.66	1.115	1.115	2.166	PPP-PPP		2.3	1	0.0168	0.0168		0.0018		GgaAffx.25567.1.S1_at
GgaAffx.22988.1.S1_at	1676.64	3630.81	1.115	1.115	2.166	PPA-PPP		2.3	1	0.0168	0.0168		0.0025		GgaAffx.22988.1.S1_at
GgaAffx.2958.1.S1_at	458.63	992.14	1.113	1.113	2.163	PPP-PPP		2.1	2	0.0198	0.0347		0.0041		similar to Scg3 protein	---	415424	LOC415424	ENSGALT00000007601.1	---	---	---
Gga.10186.1.S1_at	186.28	402.99	1.113	1.113	2.163	PPP-PPP		1.9	3	0.0236	0.0372		0.0061		immunoglobulin superfamily, member 4D	gga.10186	418463	IGSF4D	BX950409.2	---	---	---
GgaAffx.23641.1.S1_s_at	75.88	164.14	1.113	1.113	2.163	AAA-PAP		1.5	7	0.0444	0.1043		0.0151		GgaAffx.23641.1.S1_s_at
Gga.316.1.S1_at	689.28	1488.92	1.111	1.111	2.16	PPP-PPP		1.3	9	0.0579	0.1141		0.0242		NSCL2 protein	gga.9445	395578	NSCL2	AF123885.1	45449 // regulation of transcription // inferred from electronic annotation	5634 // nucleus // inferred from electronic annotation	30528 // transcription regulator activity // inferred from electronic annotation
GgaAffx.1993.5.S1_s_at	272.52	586.4	1.106	1.106	2.152	PPP-PPP		2.3	1	0.0168	0.0168		0.0026		GgaAffx.1993.5.S1_s_at
Gga.1473.1.S1_at	2667.32	5739.17	1.105	1.105	2.152	PPP-PPP		1.9	3	0.0236	0.0372		0.0058		v-jun sarcoma virus 17 oncogene homolog (avian)	gga.1473	424673	JUN	BU458470	---	---	---
Gga.18356.1.S1_at	1747.39	3755.11	1.104	1.104	2.149	PPP-PPP		2.3	1	0.0168	0.0168		0.0017		Finished cDNA, clone ChEST709m2	gga.18356	---	---	CR390396.1	---	---	---
Gga.185.1.S1_a_at	150.8	323.82	1.103	1.103	2.147	PPP-PPP		2.1	2	0.0198	0.0347		0.0036		actin filament associated protein	gga.185	374034	AFAP	NM_204205.1	---	---	---
GgaAffx.2814.1.S1_at	166.66	357.37	1.1	1.1	2.144	APA-PPP		2.3	1	0.0168	0.0168		0.0008		similar to one cut domain, family member 1; Hepatocyte nuclear factor 6	---	427498	LOC427498	ENSGALT00000007245.1	---	---	---
GgaAffx.23235.1.S1_at	279.51	599.14	1.1	1.1	2.144	PPP-PPP		1.3	9	0.0579	0.1141		0.0226		GgaAffx.23235.1.S1_at
GgaAffx.12413.1.S1_at	960.43	2058.3	1.1	1.1	2.143	PPP-PPP		2.3	1	0.0168	0.0168		0.0002		GgaAffx.12413.1.S1_at
Gga.1230.1.S1_at	249.01	533.43	1.099	1.099	2.142	PPP-PPP		2.1	2	0.0198	0.0347		0.0035		DnaJ (Hsp40) homolog, subfamily C, member 12	gga.1230	423647	DNAJC12	BU455517	---	---	---
GgaAffx.23472.1.S1_at	384.44	822.97	1.098	1.098	2.141	PPP-PPP		1.9	3	0.0236	0.0372		0.0066		GgaAffx.23472.1.S1_at
Gga.1777.1.S1_x_at	1742.64	3726.31	1.096	1.096	2.138	PPP-PPP		1.9	3	0.0236	0.0372		0.0057		Finished cDNA, clone ChEST964l4	gga.1777	---	---	CR385493.1	---	---	---
GgaAffx.7749.1.S1_at	358.41	765.43	1.095	1.095	2.136	PPP-PPP		1.9	3	0.0236	0.0372		0.0051		similar to MAM domain containing protein 1 precursor (MAM domain-containing glycosylphosphatidylinositol anchor protein 2) (UNQ8188/PRO23197)	---	423563	LOC423563	ENSGALT00000019970.1	---	---	---
Gga.19161.1.S1_at	332.72	710.68	1.095	1.095	2.136	PPP-PPP		1.4	8	0.0503	0.0865		0.0162		Finished cDNA, clone ChEST932l13	gga.19161	---	---	BU436159	---	---	---
Gga.7198.1.S1_at	518.38	1105.8	1.093	1.093	2.133	PPP-PPP		2.3	1	0.0168	0.0168		0.0029		Finished cDNA, clone ChEST851e22	gga.7198	---	---	BX259869	---	---	---
GgaAffx.22308.1.S1_at	137.32	292.9	1.093	1.093	2.133	AAA-PMP		1	12	0.0992	0.1959		0.05		GgaAffx.22308.1.S1_at
GgaAffx.6053.1.S1_at	1807.01	3842.76	1.089	1.089	2.127	PPP-PPP		2.3	1	0.0168	0.0168		0.0029		GgaAffx.6053.1.S1_at	---	---	---	ENSGALT00000015706.1	---	---	---
Gga.17521.1.S1_s_at	389.08	827.76	1.089	1.089	2.127	PPP-PPP		1.7	5	0.0332	0.0648		0.0083		N-acylsphingosine amidohydrolase (acid ceramidase) 1	gga.17521	422727	ASAH1	BU144941	---	---	---
GgaAffx.20970.1.S1_at	143.88	305.75	1.088	1.088	2.125	PAP-PPP		1	12	0.0992	0.1959		0.0498		GgaAffx.20970.1.S1_at
Gga.2188.1.S1_s_at	526.93	1118.5	1.086	1.086	2.123	PPP-PPP		2.1	2	0.0198	0.0347		0.003		similar to cyclin I	---	422634	LOC422634	BU339276	---	---	---
GgaAffx.9485.1.S1_at	91.16	193.58	1.086	1.086	2.123	PAA-PPP		1.1	11	0.0812	0.1412		0.0371		similar to lung alpha/beta hydrolase fold protein 3	---	421068	LOC421068	ENSGALT00000024095.1	---	---	---
Gga.16589.1.S1_at	309.85	657.59	1.086	1.086	2.122	PPP-PPP		1.8	4	0.0277	0.0556		0.0069		lymphocyte-specific protein 1	gga.4491	374254	LSP1	NM_204342.1	7165 // signal transduction // inferred from electronic annotation /// 6936 // muscle contraction // inferred from electronic annotation	---	4871 // signal transducer activity // inferred from electronic annotation /// 3779 // actin binding // inferred from electronic annotation /// 5516 // calmodulin binding // inferred from electronic annotation /// 17022 // myosin binding // inferred from el
Gga.4179.1.S1_at	2126.49	4512.45	1.085	1.085	2.122	PPP-PPP		1.4	8	0.0503	0.0865		0.0184		neurofilament 3 (150kDa medium)	gga.4179	396206	NEF3	BU281396	---	5882 // intermediate filament // inferred from electronic annotation	5198 // structural molecule activity // inferred from electronic annotation
GgaAffx.23924.2.S1_s_at	183.1	387.9	1.083	1.083	2.118	PAP-PPP		1.7	5	0.0332	0.0648		0.01		GgaAffx.23924.2.S1_s_at
GgaAffx.24789.2.S1_s_at	71.19	150.71	1.082	1.082	2.117	AAA-PAP		1.2	10	0.0697	0.1207		0.0255		GgaAffx.24789.2.S1_s_at
Gga.16796.1.S1_at	230.08	485.04	1.076	1.076	2.108	PPM-PPP		2.3	1	0.0168	0.0168		0.0014		Finished cDNA, clone ChEST908c2	gga.16796	---	---	CN218794	---	---	---
Gga.212.1.S1_at	237.22	499.89	1.075	1.075	2.107	PPP-PPP		1.7	5	0.0332	0.0648		0.0092		neurexin 1	gga.212	395398	NRXN1	BU351367	7155 // cell adhesion // inferred from electronic annotation	16021 // integral to membrane // inferred from electronic annotation	5515 // protein binding // inferred from electronic annotation
Gga.18896.1.S1_at	294.5	620.16	1.074	1.074	2.106	PPP-PPP		2.3	1	0.0168	0.0168		0.0006		Finished cDNA, clone ChEST55i12	gga.18896	---	---	CN237332	---	---	---
Gga.12422.1.S1_at	440.79	927.75	1.074	1.074	2.105	PPP-PPP		1.8	4	0.0277	0.0556		0.0065		Transcribed locus	gga.12422	---	---	CK613298	---	---	---
Gga.1978.1.S1_at	572.36	1204.9	1.074	1.074	2.105	PPP-PPP		1.6	6	0.0361	0.0591		0.0101		Finished cDNA, clone ChEST1014d20	gga.1978	---	---	CN218839	---	---	---
GgaAffx.5966.1.S1_at	1075.04	2258.23	1.071	1.071	2.101	PPP-PPP		1.4	8	0.0503	0.0865		0.0169		cyclin-dependent kinase 6	gga.22852	420558	CDK6	ENSGALT00000015428.1	---	---	---
Gga.16412.1.S1_s_at	223.18	468.44	1.07	1.07	2.099	MAP-PPP		1.5	7	0.0444	0.1043		0.0142		dishevelled, dsh homolog 1 (Drosophila)	gga.16412	419416	DVL1	BU390271	7222 // frizzled signaling pathway // inferred from electronic annotation /// 7242 // intracellular signaling cascade // inferred from electronic annotation /// 7275 // development // inferred from electronic annotation	---	4871 // signal transducer activity // inferred from electronic annotation /// 5515 // protein binding // inferred from electronic annotation
Gga.19225.1.S1_at	104.99	220.21	1.069	1.069	2.098	AAA-PPP		1.3	9	0.0579	0.1141		0.0195		Finished cDNA, clone ChEST668j19	gga.19225	---	---	CR407532.1	---	---	---
GgaAffx.26390.2.S1_s_at	424.85	890.49	1.068	1.068	2.096	APP-PPP		1	12	0.0992	0.1959		0.0421		GgaAffx.26390.2.S1_s_at
Gga.756.1.S1_s_at	158.79	331.85	1.063	1.063	2.09	PAA-PPP		1.7	5	0.0332	0.0648		0.009		ankyrin 2	gga.756	396310	CHANK2	U50445.1	---	---	---
Gga.13016.1.S1_at	337.42	704.24	1.062	1.062	2.087	PPP-PPP		1.4	8	0.0503	0.0865		0.0166		Finished cDNA, clone ChEST50a13	gga.13016	---	---	CR353230.1	---	---	---
Gga.7722.1.S1_at	73.58	153.35	1.059	1.059	2.084	AAA-PAA		1.9	3	0.0236	0.0372		0.0043		Transcribed locus	gga.7722	---	---	BX264235	---	---	---
GgaAffx.23757.6.S1_s_at	101.83	212.08	1.058	1.058	2.083	PAP-PPP		2.1	2	0.0198	0.0347		0.0034		GgaAffx.23757.6.S1_s_at
Gga.13830.1.S1_at	138.82	289.17	1.059	1.059	2.083	PPP-PPP		1.9	3	0.0236	0.0372		0.006		Finished cDNA, clone ChEST260i20	gga.13830	---	---	CR354220.1	---	---	---
Gga.6448.1.S1_s_at	571.93	1191.53	1.059	1.059	2.083	PPP-PPP		1.6	6	0.0361	0.0591		0.0113		pleckstrin homology-like domain, family A, member 2	gga.6448	423088	PHLDA2	BX950502.2	---	---	---
GgaAffx.3119.2.S1_s_at	353.89	736.47	1.057	1.057	2.081	PPP-PPP		2.3	1	0.0168	0.0168		0.001		GgaAffx.3119.2.S1_s_at
GgaAffx.23665.1.S1_x_at	1088.6	2264.57	1.057	1.057	2.08	PPP-PPP		2.3	1	0.0168	0.0168		0.0008		GgaAffx.23665.1.S1_x_at
GgaAffx.21239.1.S1_at	269.17	559.71	1.056	1.056	2.079	PPM-PPP		2.3	1	0.0168	0.0168		0.0006		GgaAffx.21239.1.S1_at
GgaAffx.9032.4.S1_s_at	127.65	265.26	1.055	1.055	2.078	PAA-PPP		2.3	1	0.0168	0.0168		0.0019		GgaAffx.9032.4.S1_s_at
GgaAffx.23427.1.S1_s_at	207.5	431.26	1.055	1.055	2.078	PPP-PPP		1.8	4	0.0277	0.0556		0.0076		GgaAffx.23427.1.S1_s_at
Gga.19033.1.S1_at	387.86	805.5	1.054	1.054	2.077	PPP-PPP		2.1	2	0.0198	0.0347		0.0029		Finished cDNA, clone ChEST727m19	gga.19033	---	---	BU342250	---	---	---
GgaAffx.4097.1.S1_at	261.43	542.78	1.054	1.054	2.076	PPA-PPP		1.6	6	0.0361	0.0591		0.0105		similar to Metabotropic glutamate receptor 3 precursor (mGluR3)	---	418644	LOC418644	ENSGALT00000010624.1	---	---	---
GgaAffx.24583.1.S1_at	280.02	580.6	1.052	1.052	2.073	PPP-PPP		1.5	7	0.0444	0.1043		0.0135		GgaAffx.24583.1.S1_at
GgaAffx.20875.1.S1_at	397.79	823.31	1.049	1.049	2.07	PPP-PPP		2.3	1	0.0168	0.0168		0.0012		GgaAffx.20875.1.S1_at
Gga.7698.1.S1_at	248.92	515.36	1.05	1.05	2.07	PPP-PPP		2.1	2	0.0198	0.0347		0.0038		Transcribed locus	gga.7698	---	---	BX264378	---	---	---
Gga.18351.1.A1_at	178.48	369.25	1.049	1.049	2.069	PAA-PPP		1.4	8	0.0503	0.0865		0.017		Sulf1 mRNA, complete sequence	gga.8948	---	---	CR390376.1	---	---	---
GgaAffx.24948.1.S1_s_at	72.72	150.38	1.048	1.048	2.068	PMP-PPP		2.3	1	0.0168	0.0168		0.0015		GgaAffx.24948.1.S1_s_at
Gga.7234.1.S1_at	142.69	295.07	1.048	1.048	2.068	PPP-PPP		1.3	9	0.0579	0.1141		0.0232		similar to RIKEN cDNA 5430407P10	gga.19674	419101	LOC419101	BU215674	---	---	---
GgaAffx.5586.1.S1_at	189.13	390.84	1.047	1.047	2.067	PPP-PPP		1.2	10	0.0697	0.1207		0.0261		similar to Synaptotagmin IV (SytIV)	---	422960	LOC422960	ENSGALT00000014456.1	---	---	---
GgaAffx.7682.1.S1_at	84.62	174.87	1.047	1.047	2.066	AAA-MAP		1.2	10	0.0697	0.1207		0.0291		similar to engrailed protein	---	429046	LOC429046	ENSGALT00000019794.1	---	---	---
Gga.19450.1.S1_at	3399.24	7015.1	1.045	1.045	2.064	PPP-PPP		2.3	1	0.0168	0.0168		0.0001		Finished cDNA, clone ChEST336c20	gga.19450	---	---	BU303925	---	---	---
GgaAffx.2342.1.S1_at	204.67	421.97	1.044	1.044	2.062	MAA-PPP		1.3	9	0.0579	0.1141		0.0216		similar to myosin 18A isoform a; myosin 18A; myosin containing PDZ domain	---	417581	LOC417581	ENSGALT00000005936.1	---	---	---
Gga.13301.1.S1_at	643.36	1325.15	1.042	1.042	2.06	PPP-PPP		2.3	1	0.0168	0.0168		0.0011		Finished cDNA, clone ChEST71c24	gga.13301	---	---	BU418326	---	---	---
Gga.840.2.S1_a_at	1113.69	2293.42	1.042	1.042	2.059	PPP-PPP		2.3	1	0.0168	0.0168		0.0007		Myosin alkali light chain mRNA, complete cds, clone pF1	gga.840	---	---	M15645.1	7517 // muscle development // inferred from electronic annotation	16459 // myosin // inferred from electronic annotation	3774 // motor activity // inferred from electronic annotation /// 5509 // calcium ion binding // inferred from electronic annotation
Gga.13357.1.S1_at	208.55	429.3	1.042	1.042	2.059	PPP-PPP		1.1	11	0.0812	0.1412		0.0348		osteopetrosis associated transmembrane protein 1	gga.13357	421773	OSTM1	BU453758	---	---	---
Gga.3972.1.S2_at	194.89	400.65	1.04	1.04	2.056	PPP-PPP		1	12	0.0992	0.1959		0.0418		sema domain, immunoglobulin domain (Ig), short basic domain, secreted, (semaphorin) 3D	gga.3972	396332	SEMA3D	BU407384	7275 // development // inferred from electronic annotation /// 7399 // nervous system development // inferred from electronic annotation /// 30154 // cell differentiation // inferred from electronic annotation	16020 // membrane // inferred from electronic annotation	4872 // receptor activity // inferred from electronic annotation
Gga.7357.1.S1_at	431.73	885.67	1.037	1.037	2.051	AAA-PPP		1.8	4	0.0277	0.0556		0.0064		Transcribed locus	gga.7357	---	---	BM492051	---	---	---
Gga.13821.1.S1_at	294.54	602.85	1.033	1.033	2.047	PPP-PPP		2.3	1	0.0168	0.0168		0.0024		Finished cDNA, clone ChEST1029c11	gga.13821	---	---	BU271095	---	---	---
GgaAffx.21467.1.S1_at	893.18	1825.56	1.031	1.031	2.044	PPP-PPP		1.9	3	0.0236	0.0372		0.0045		GgaAffx.21467.1.S1_at
Gga.16876.1.S1_s_at	192.27	393.08	1.032	1.032	2.044	AAA-PPP		1.4	8	0.0503	0.0865		0.0184		microtubule-associated protein 2	gga.4097	424001	MAP2	BU401140	---	---	---
GgaAffx.21938.2.S1_s_at	74.56	152.36	1.031	1.031	2.043	AAA-PAA		1.8	4	0.0277	0.0556		0.0062		GgaAffx.21938.2.S1_s_at
GgaAffx.21668.1.S1_s_at	186.94	381.84	1.03	1.03	2.043	PPP-PPP		1.1	11	0.0812	0.1412		0.0363		GgaAffx.21668.1.S1_s_at
GgaAffx.23747.1.S1_s_at	348.3	711.36	1.03	1.03	2.042	PPP-PPP		2.3	1	0.0168	0.0168		0.0016		GgaAffx.23747.1.S1_s_at
GgaAffx.4028.3.S1_s_at	56.09	114.26	1.027	1.027	2.037	PAA-PPM		2.3	1	0.0168	0.0168		0.0002		GgaAffx.4028.3.S1_s_at
Gga.20059.1.S1_at	668.04	1360.71	1.026	1.026	2.037	PPP-PPP		1.6	6	0.0361	0.0591		0.0096		Finished cDNA, clone ChEST881e11	gga.20059	---	---	CR405872.1	---	---	---
Gga.7617.1.S1_at	943.82	1920.31	1.025	1.025	2.035	PPP-PPP		1.7	5	0.0332	0.0648		0.0084		Transcribed locus	gga.7617	---	---	BU361519	---	---	---
Gga.18463.1.S1_at	255.2	519.09	1.024	1.024	2.034	PPP-PPP		1.7	5	0.0332	0.0648		0.0075		similar to hypothetical protein FLJ10404	gga.18463	416216	LOC416216	AJ393387	---	---	---
Gga.9316.1.S1_at	688.51	1394.91	1.019	1.019	2.026	PPP-PPP		1.5	7	0.0444	0.1043		0.0131		heparan sulfate 6-O-sulfotransferase	gga.9316	395141	CHS6ST-1	NM_204482.1	---	16021 // integral to membrane // inferred from electronic annotation	16740 // transferase activity // inferred from electronic annotation
Gga.4730.1.S1_at	309.58	626.84	1.018	1.018	2.025	PPP-PPP		1.8	4	0.0277	0.0556		0.0063		Finished cDNA, clone ChEST490o21	gga.4730	---	---	CR387467.1	---	---	---
GgaAffx.13038.1.S1_at	148.55	300.27	1.015	1.015	2.021	AAA-PMA		2.3	1	0.0168	0.0168		0.0002		GgaAffx.13038.1.S1_at
GgaAffx.8992.1.S1_at	173.76	351.24	1.015	1.015	2.021	AAA-PMM		1.1	11	0.0812	0.1412		0.0345		similar to sulfotransferase family 4A, member 1; sulfotransferase-related protein; sulfotransferase family 4A member 1	---	418232	LOC418232	ENSGALT00000022945.1	---	---	---
Gga.5690.1.S1_s_at	694.95	1403.01	1.014	1.014	2.019	PPP-PPP		2.3	1	0.0168	0.0168		0.0003		Hypothetical protein, clone 14l15	gga.5690	---	---	BU352189	---	---	166 // nucleotide binding // inferred from electronic annotation /// 3676 // nucleic acid binding // inferred from electronic annotation /// 3723 // RNA binding // inferred from electronic annotation
Gga.9493.1.S1_at	1086.03	2193.2	1.014	1.014	2.019	PPP-PPP		2.3	1	0.0168	0.0168		0.0009		dihydropyrimidinase-like 3	gga.9493	395154	DPYSL3	NM_204493.1	---	---	16787 // hydrolase activity // inferred from electronic annotation
GgaAffx.7278.2.S1_at	50.61	102.08	1.012	1.012	2.017	AAA-PPP		2.3	1	0.0168	0.0168		0.0002		SWI/SNF related, matrix associated, actin dependent regulator of chromatin, subfamily a-like 1	gga.1034	396031	SMARCAL1	ENSGALT00000018711.1	6412 // protein biosynthesis // inferred from electronic annotation	5622 // intracellular // inferred from electronic annotation /// 5840 // ribosome // inferred from electronic annotation /// 30529 // ribonucleoprotein complex // inferred from electronic annotation	3735 // structural constituent of ribosome // inferred from electronic annotation /// 8270 // zinc ion binding // inferred from electronic annotation /// 46872 // metal ion binding // inferred from electronic annotation
Gga.5368.1.S1_at	159.21	321.17	1.012	1.012	2.017	AAA-PPP		1.3	9	0.0579	0.1141		0.0207		Gga.5368.1.S1_at	---	---	---	BX262679	---	---	---
Gga.13207.1.S1_at	169.57	342.07	1.012	1.012	2.017	PPP-PPP		1.1	11	0.0812	0.1412		0.0323		neurolysin (metallopeptidase M3 family)	gga.13207	427167	NLN	BU379156	---	---	---
Gga.17769.1.S1_at	2145.61	4326.55	1.012	1.012	2.016	PPP-PPP		2.3	1	0.0168	0.0168		0.0002		Finished cDNA, clone ChEST847b13	gga.17769	---	---	CF250828	---	---	---
Gga.15946.1.S1_at	360.99	727.69	1.011	1.011	2.016	PPP-PPP		1.4	8	0.0503	0.0865		0.0166		similar to kinesin-related microtuble-based motor protein	---	424849	LOC424849	CN220902	---	---	---
Gga.3323.1.S1_s_at	963.77	1940.11	1.009	1.009	2.013	PPP-PPP		1.9	3	0.0236	0.0372		0.0058		fatty acid binding protein 5 (psoriasis-associated)	gga.3323	420197	FABP5	BU116455	6810 // transport // inferred from electronic annotation	---	5488 // binding // inferred from electronic annotation /// 8289 // lipid binding // inferred from electronic annotation
Gga.13183.1.S1_at	434.1	872.78	1.008	1.008	2.011	PPP-PPP		2.3	1	0.0168	0.0168		0.0003		Finished cDNA, clone ChEST224k20	gga.13183	---	---	BU349946	---	---	---
Gga.7994.1.S1_at	139.45	280.16	1.007	1.007	2.009	PAA-PPP		1.7	5	0.0332	0.0648		0.0075		Transcribed locus	gga.7994	---	---	BU263661	---	---	---
GgaAffx.11713.1.S1_s_at	102.03	205.03	1.007	1.007	2.009	PAP-PPP		1	12	0.0992	0.1959		0.0464		GgaAffx.11713.1.S1_s_at
Gga.11739.1.S1_at	1111.33	2230.96	1.005	1.005	2.007	PPP-PPP		2.3	1	0.0168	0.0168		0.0001		poly(rC) binding protein 2	gga.11739	420965	PCBP2	CN222713	---	---	---
Gga.1941.1.S1_at	1559.11	3124.89	1.003	1.003	2.004	PPP-PPP		2.3	1	0.0168	0.0168		0.0001		frizzled homolog 4 (Drosophila)	gga.1941	373887	FZD4	NM_204099.1	7165 // signal transduction // inferred from electronic annotation /// 7166 // cell surface receptor linked signal transduction // inferred from electronic annotation /// 7186 // G-protein coupled receptor protein signaling pathway // inferred from electro	16020 // membrane // inferred from electronic annotation /// 16021 // integral to membrane // inferred from electronic annotation	4871 // signal transducer activity // inferred from electronic annotation /// 4872 // receptor activity // inferred from electronic annotation /// 4926 // non-G-protein coupled 7TM receptor activity // inferred from electronic annotation /// 4930 // G-prot
Gga.1792.1.S1_at	1688.28	3381.58	1.002	1.002	2.003	PPP-PPP		2.3	1	0.0168	0.0168		0.0018		chromosome 9 open reading frame 58	gga.1792	417179	C9orf58	BX540532	---	---	---
Gga.19107.1.S1_at	1703.98	3412.99	1.002	1.002	2.003	PPP-PPP		1.9	3	0.0236	0.0372		0.0048		Finished cDNA, clone ChEST959a8	gga.19107	---	---	CR406474.1	---	---	---
GgaAffx.21660.1.S1_at	86.43	173.12	1.002	1.002	2.003	AAA-APA		1.4	8	0.0503	0.0865		0.0174		GgaAffx.21660.1.S1_at
GgaAffx.9480.1.A1_at	941.48	1884.19	1.001	1.001	2.001	PPP-PPP		1.5	7	0.0444	0.1043		0.0128		similar to actin-binding protein	---	427203	LOC427203	ENSGALT00000024081.1	---	---	---
Gga.6962.2.S1_s_at	378.44	756.85	1	1	2	MAA-PPP		1.2	10	0.0697	0.1207		0.0232		transmembrane 7 superfamily member 1 (upregulated in kidney)	gga.6962	421511	TM7SF1	BX267553	---	---	---
GgaAffx.23665.1.S1_at	2274.57	4547.9	1	1	1.999	PPP-PPP		2.3	1	0.0168	0.0168		0.0013		GgaAffx.23665.1.S1_at
Gga.16846.1.S1_s_at	516.72	1033.15	1	1	1.999	PPP-PPP		2.3	1	0.0168	0.0168		0.002		hypothetical gene supported by CR406243 /// LOC425595	---	422945 /	LOC422945 /// LOC425595	BU106500	---	---	---
GgaAffx.21332.1.S1_s_at	230.76	461.37	1	1	1.999	PPP-PPP		1.1	11	0.0812	0.1412		0.0315		GgaAffx.21332.1.S1_s_at
GgaAffx.9310.1.S1_s_at	726.63	1451.79	0.999	0.999	1.998	PPP-PPP		2.3	1	0.0168	0.0168		0.001		GgaAffx.9310.1.S1_s_at
GgaAffx.8369.1.S1_s_at	318.17	635.71	0.999	0.999	1.998	PPP-PPP		2.3	1	0.0168	0.0168		0.0011		GgaAffx.8369.1.S1_s_at
Gga.5253.1.S1_at	563.41	1125.9	0.999	0.999	1.998	PPP-PPP		1.9	3	0.0236	0.0372		0.0055		Transcribed locus	gga.5253	---	---	BX277513	---	---	---
GgaAffx.23409.3.S1_s_at	226.65	452.62	0.998	0.998	1.997	MAA-PPP		1.9	3	0.0236	0.0372		0.0041		GgaAffx.23409.3.S1_s_at
Gga.11857.1.S1_s_at	97.77	195.26	0.998	0.998	1.997	AAA-PMA		1.6	6	0.0361	0.0591		0.011		similar to KIAA1726 protein	gga.11857	418963	LOC418963	BX950438.2	---	---	---

## Sheet: SuppTable 2b.HH19-HH16 DOWN
Transcript	Control Group Signal	Exp Group Signal	Est Log Ratio	Abs Log Ratio	Raw Est Fold Change	Affy PA Calls Cntl Grp-Exp Grp		Delta (PADE)	Set (PADE)	FDR for Accumulated Sets (PADE)	FDR for Specific Set (PADE)		Individual Transcript p-value	Gene Descriptor	Unigene	Entrez Gene	Gene_Symbol	SeqDerivedFrom	GO_Bio_Process	GO_Cell_Component	GO_Molecular_Function
Gga.18151.1.S1_at	90.61	4.14	-4.453	4.453	-21.895	PAP-AAA		2.3	1	0.0168	0.0168		0.0009	Finished cDNA, clone ChEST711o7	gga.18151	---	---	BU201421	---	---	---
Gga.4978.3.S1_a_at	181.9	8.55	-4.411	4.411	-21.276	PAP-AAA		2.3	1	0.0168	0.0168		0.0026	calbindin 2, 29kDa (calretinin)	gga.4978	396255	CALB2	BX930785.1	---	---	5509 // calcium ion binding // inferred from electronic annotation
NC-002188.CDS195.S1_at	28.47	1.4	-4.35	4.35	-20.393	AAP-AAA		2.3	1	0.0168	0.0168		0.0008	NC-002188.CDS195.S1_at
Gga.218.1.S1_at	151.09	9.12	-4.05	4.05	-16.568	PAP-AAA		1.9	3	0.0236	0.0372		0.007	Dermo protein	gga.218	395405	CDERMO-1	NM_204679.1	45449 // regulation of transcription // inferred from electronic annotation	5634 // nucleus // inferred from electronic annotation	30528 // transcription regulator activity // inferred from electronic annotation
GgaAffx.22628.1.S1_at	73.37	4.54	-4.015	4.015	-16.169	APA-AAA		1.8	4	0.0277	0.0556		0.0082	GgaAffx.22628.1.S1_at
Gga.3973.1.S1_at	552.66	35.3	-3.969	3.969	-15.655	PAP-AAA		1.1	11	0.0812	0.1412		0.0404	cTwist	gga.3973	395491	LOC395491	NM_204739.1	45449 // regulation of transcription // inferred from electronic annotation	5634 // nucleus // inferred from electronic annotation	30528 // transcription regulator activity // inferred from electronic annotation
Gga.2533.1.S1_s_at	199.24	13.66	-3.866	3.866	-14.584	PPP-AAA		1.2	10	0.0697	0.1207		0.0272	glutathione S-transferase A1	gga.2533	414896	GSTA1	L15386.1	---	---	4364 // glutathione transferase activity // inferred from electronic annotation /// 16740 // transferase activity // inferred from electronic annotation
Gga.5133.1.S1_at	533.95	48.14	-3.471	3.471	-11.091	PPP-AAA		2.3	1	0.0168	0.0168		0.0003	deleted in azoospermia-like	gga.5133	374054	DAZL	NM_204218.1	6417 // regulation of protein biosynthesis // inferred from electronic annotation /// 6445 // regulation of translation // inferred from electronic annotation /// 7275 // development // inferred from electronic annotation /// 7283 // spermatogenesis // inf	---	166 // nucleotide binding // inferred from electronic annotation /// 3676 // nucleic acid binding // inferred from electronic annotation /// 3723 // RNA binding // inferred from electronic annotation
Gga.811.1.S1_at	994.2	90.71	-3.454	3.454	-10.96	PPP-AAA		1.9	3	0.0236	0.0372		0.0062	growth differentiation factor 2	gga.811	396412	GDF2	NM_205432.1	40007 // growth // inferred from electronic annotation	5576 // extracellular region // inferred from electronic annotation /// 5615 // extracellular space // inferred from electronic annotation	5125 // cytokine activity // inferred from electronic annotation /// 8083 // growth factor activity // inferred from electronic annotation
Gga.3731.2.S1_a_at	186.2	17.01	-3.452	3.452	-10.943	AAP-AAA		2.3	1	0.0168	0.0168		0.0024	gammaFBP-A	gga.3731	396164	LOC396164	BG710399	6350 // transcription // inferred from electronic annotation /// 6355 // regulation of transcription, DNA-dependent // inferred from electronic annotation /// 7275 // development // inferred from electronic annotation	5634 // nucleus // inferred from electronic annotation	3676 // nucleic acid binding // inferred from electronic annotation /// 3677 // DNA binding // inferred from electronic annotation /// 5515 // protein binding // inferred from electronic annotation /// 8270 // zinc ion binding // inferred from electronic a
Gga.16924.1.S1_at	204.64	19.98	-3.357	3.357	-10.243	PPA-AAA		2.3	1	0.0168	0.0168		0.0014	similar to embryonic stem cell specific homeobox protein	---	427943	LOC427943	BU464710	---	---	---
GgaAffx.3720.1.S1_at	1684.39	165.72	-3.345	3.345	-10.164	PPP-PPP		2.3	1	0.0168	0.0168		0	similar to prepro bone inducing protein	---	423776	LOC423776	ENSGALT00000009625.1	---	---	---
Gga.120.1.S1_a_at	135.79	15.08	-3.171	3.171	-9.006	PAP-AAA		1.3	9	0.0579	0.1141		0.0208	T-box 22	gga.120	373895	TBX22	NM_204106.1	6355 // regulation of transcription, DNA-dependent // inferred from electronic annotation	5634 // nucleus // inferred from electronic annotation	3700 // transcription factor activity // inferred from electronic annotation
Gga.18610.1.S1_at	349.71	42.1	-3.054	3.054	-8.306	PPP-APA		1.1	11	0.0812	0.1412		0.0351	Finished cDNA, clone ChEST198i4	gga.18610	---	---	BU447327	---	---	---
GgaAffx.24214.1.S1_at	129.29	16.08	-3.007	3.007	-8.041	MAP-AAA		1	12	0.0992	0.1959		0.0413	GgaAffx.24214.1.S1_at
Gga.7117.1.S1_at	49.44	6.33	-2.967	2.967	-7.817	PAA-AAA		2.3	1	0.0168	0.0168		0.002	ligatin	gga.7117	419845	LGTN	BU235493	---	---	3723 // RNA binding // inferred from electronic annotation
Gga.18354.1.S1_at	78.37	10.09	-2.957	2.957	-7.764	APA-AAA		2.3	1	0.0168	0.0168		0.0016	Finished cDNA, clone ChEST424k16	gga.18354	---	---	BU260269	---	---	---
Gga.16936.1.S1_at	262.33	37.74	-2.797	2.797	-6.952	PPP-AAA		1.3	9	0.0579	0.1141		0.019	Finished cDNA, clone ChEST234p17	gga.16936	---	---	CR390310.1	---	---	---
Gga.4078.1.S1_at	600.97	97.68	-2.621	2.621	-6.153	PPP-PAP		1.7	5	0.0332	0.0648		0.0089	lumican	gga.4078	417891	LUM	BX272380	---	5578 // extracellular matrix (sensu Metazoa) // inferred from electronic annotation	---
Gga.4003.1.S1_at	1649.79	277.98	-2.569	2.569	-5.935	PPP-PAA		1.8	4	0.0277	0.0556		0.0078	similar to hypothetical protein MGC4504	gga.4003	423209	LOC423209	BU143709	---	---	---
Gga.70.1.S1_at	438.36	77.76	-2.495	2.495	-5.637	PPP-PAA		2.3	1	0.0168	0.0168		0.0007	bagpipe homeobox homolog 1 (Drosophila)	gga.70	373932	BAPX1	AF138905.1	6355 // regulation of transcription, DNA-dependent // inferred from electronic annotation /// 7275 // development // inferred from electronic annotation /// 45449 // regulation of transcription // inferred from electronic annotation	5634 // nucleus // inferred from electronic annotation	3677 // DNA binding // inferred from electronic annotation /// 3700 // transcription factor activity // inferred from electronic annotation
Gga.253.1.S1_at	1331.68	245.89	-2.437	2.437	-5.416	PPP-PAP		2.1	2	0.0198	0.0347		0.0038	brain factor-2	gga.253	396109	CBF-2	NM_205192.1	6350 // transcription // inferred from electronic annotation /// 6355 // regulation of transcription, DNA-dependent // inferred from electronic annotation /// 7275 // development // inferred from electronic annotation	5634 // nucleus // inferred from electronic annotation	3677 // DNA binding // inferred from electronic annotation /// 3700 // transcription factor activity // inferred from electronic annotation
Gga.1150.2.S1_a_at	982.68	189.24	-2.377	2.377	-5.193	PPP-MAA		2.3	1	0.0168	0.0168		0.0011	olfactomedin-like 3	gga.1150	419882	OLFML3	BX934430.2	---	---	---
GgaAffx.8026.1.S1_at	177.64	34.6	-2.36	2.36	-5.134	PPP-AMA		2.3	1	0.0168	0.0168		0.0015	similar to Doublecortin domain-containing protein 2 (RU2S protein)	---	420821	LOC420821	ENSGALT00000020677.1	---	---	---
GgaAffx.5056.1.S1_at	301.11	58.76	-2.357	2.357	-5.124	PPP-AAA		1.4	8	0.0503	0.0865		0.0155	similar to astacin like metalloendopeptidase	---	423176	LOC423176	ENSGALT00000013089.1	---	---	---
Gga.3477.1.S1_at	1030.79	204.54	-2.333	2.333	-5.04	PPP-PAP		1.6	6	0.0361	0.0591		0.0101	fibroblast growth factor receptor 2 (bacteria-expressed kinase, keratinocyte growth factor receptor, craniofacial dysostosis 1, Crouzon syndrome, Pfeiffer syndrome, Jackson-Weiss syndrome)	gga.3477	396259	FGFR2	NM_205319.1	6468 // protein amino acid phosphorylation // inferred from electronic annotation	16021 // integral to membrane // inferred from electronic annotation	166 // nucleotide binding // inferred from electronic annotation /// 4672 // protein kinase activity // inferred from electronic annotation /// 4713 // protein-tyrosine kinase activity // inferred from electronic annotation /// 4872 // receptor activity //
GgaAffx.11525.1.S1_s_at	857.45	172.85	-2.311	2.311	-4.961	PPP-AAA		2.3	1	0.0168	0.0168		0.0002	GgaAffx.11525.1.S1_s_at
Gga.9721.1.S1_at	356.19	72.56	-2.295	2.295	-4.909	PPA-AAA		1.9	3	0.0236	0.0372		0.005	Finished cDNA, clone ChEST166c20	gga.9721	---	---	BX935606.2	---	---	---
Gga.2996.2.S1_a_at	752.49	157.64	-2.255	2.255	-4.773	PPP-PPP		1.5	7	0.0444	0.1043		0.0118	aldehyde dehydrogenase 1 family, member A2	gga.2996	395844	ALDH1A2	BU275326	8152 // metabolism // inferred from electronic annotation	---	1758 // retinal dehydrogenase activity // inferred from electronic annotation /// 16491 // oxidoreductase activity // inferred from electronic annotation
Gga.14932.1.S1_at	76.21	15.99	-2.253	2.253	-4.767	PAA-AAA		1.2	10	0.0697	0.1207		0.0229	Finished cDNA, clone ChEST234j24	gga.14932	---	---	BU418794	---	---	---
Gga.4536.2.S1_a_at	265.3	58.43	-2.183	2.183	-4.541	PAA-AAA		2.3	1	0.0168	0.0168		0.0016	aldo-keto reductase family 1, member D1 (delta 4-3-ketosteroid-5-beta-reductase)	gga.4536	418107	AKR1D1	BX934646.1	---	---	---
Gga.2551.2.S1_a_at	250.47	56.11	-2.158	2.158	-4.464	PPP-AAA		1.5	7	0.0444	0.1043		0.0123	transferrin	gga.2551	396241	TF	BX932101.1	6810 // transport // inferred from electronic annotation /// 6826 // iron ion transport // inferred from electronic annotation /// 6879 // iron ion homeostasis // inferred from electronic annotation /// 16068 // type I hypersensitivity // inferred from ele	5576 // extracellular region // inferred from electronic annotation	5506 // iron ion binding // inferred from electronic annotation /// 8199 // ferric iron binding // inferred from electronic annotation /// 46872 // metal ion binding // inferred from electronic annotation
Gga.3551.1.S1_at	519.88	118.59	-2.132	2.132	-4.384	PPP-AAA		2.3	1	0.0168	0.0168		0.0017	osteopontin	gga.3551	395210	LOC395210	NM_204535.2	1503 // ossification // inferred from electronic annotation /// 7155 // cell adhesion // inferred from electronic annotation	5615 // extracellular space // inferred from electronic annotation	5125 // cytokine activity // inferred from electronic annotation /// 5515 // protein binding // inferred from electronic annotation
GgaAffx.6514.1.S1_at	91.93	21.23	-2.114	2.114	-4.33	AAP-AAA		0.9	13	0.124	0.2488		0.048	similar to Jun dimerization protein	---	423363	LOC423363	ENSGALT00000016803.1	---	---	---
Gga.2982.1.S1_at	260.85	60.58	-2.106	2.106	-4.306	PPP-AAA		1.1	11	0.0812	0.1412		0.0303	Liver cell adhesion molecule L-CAM	gga.2982	---	---	M16260.1	7155 // cell adhesion // inferred from electronic annotation /// 7156 // homophilic cell adhesion // inferred from electronic annotation	16020 // membrane // inferred from electronic annotation /// 16021 // integral to membrane // inferred from electronic annotation	5509 // calcium ion binding // inferred from electronic annotation /// 5515 // protein binding // inferred from electronic annotation
Gga.19073.1.S1_at	3485.05	814.29	-2.098	2.098	-4.28	PPP-PPP		2.3	1	0.0168	0.0168		0.0001	Finished cDNA, clone ChEST971n13	gga.19073	---	---	BU109709	---	---	---
GgaAffx.26108.1.S1_at	51.13	12.17	-2.071	2.071	-4.203	PAA-AAA		1.1	11	0.0812	0.1412		0.0282	GgaAffx.26108.1.S1_at
GgaAffx.6775.1.S1_at	345.13	83.66	-2.045	2.045	-4.125	PPM-AAA		2.3	1	0.0168	0.0168		0.0013	similar to Wnt inhibitory factor 1 precursor (WIF-1)	gga.14252	420587	LOC420587	ENSGALT00000017451.1	---	---	---
Gga.3851.1.S2_at	461.21	113.8	-2.019	2.019	-4.053	PPP-PAM		1.1	11	0.0812	0.1412		0.0286	snail like protein	gga.3851	396047	LOC396047	BU456021	---	5634 // nucleus // inferred from electronic annotation	3676 // nucleic acid binding // inferred from electronic annotation /// 8270 // zinc ion binding // inferred from electronic annotation /// 46872 // metal ion binding // inferred from electronic annotation
Gga.2551.2.S1_s_at	181.72	44.97	-2.015	2.015	-4.041	PPP-PAA		2.3	1	0.0168	0.0168		0.0007	transferrin	gga.2551	396241	TF	BX932101.1	6810 // transport // inferred from electronic annotation /// 6826 // iron ion transport // inferred from electronic annotation /// 6879 // iron ion homeostasis // inferred from electronic annotation /// 16068 // type I hypersensitivity // inferred from ele	5576 // extracellular region // inferred from electronic annotation	5506 // iron ion binding // inferred from electronic annotation /// 8199 // ferric iron binding // inferred from electronic annotation /// 46872 // metal ion binding // inferred from electronic annotation
Gga.556.1.S1_at	1518.29	376.74	-2.011	2.011	-4.03	PPP-PPP		1.4	8	0.0503	0.0865		0.0154	paired box gene 6 (aniridia, keratitis)	gga.556	395943	PAX6	NM_205066.1	6350 // transcription // inferred from electronic annotation /// 6355 // regulation of transcription, DNA-dependent // inferred from electronic annotation /// 7275 // development // inferred from electronic annotation /// 45449 // regulation of transcripti	5634 // nucleus // inferred from electronic annotation	3677 // DNA binding // inferred from electronic annotation /// 3700 // transcription factor activity // inferred from electronic annotation /// 5515 // protein binding // inferred from physical interaction
Gga.519.1.S1_at	940.01	233.43	-2.01	2.01	-4.027	PPP-AAP		2.3	1	0.0168	0.0168		0.002	TENP protein	gga.519	395882	TENP	NM_205026.1	---	---	8289 // lipid binding // inferred from electronic annotation
Gga.5154.1.S1_at	741.07	184.39	-2.007	2.007	-4.019	PPP-PPP		1.2	10	0.0697	0.1207		0.022	Periostin, osteoblast specific factor	gga.5154	395429	OSF-2	BU435666	7155 // cell adhesion // inferred from electronic annotation	---	---
Gga.9080.1.S1_at	228.65	59.32	-1.947	1.947	-3.854	PPP-AAA		2.3	1	0.0168	0.0168		0.0024	similar to plakophilin 2a	---	418130	LOC418130	BU309585	---	---	---
Gga.18984.1.S1_at	338.31	88.39	-1.936	1.936	-3.828	PPP-PAA		1	12	0.0992	0.1959		0.0423	Finished cDNA, clone ChEST608b15	gga.18984	---	---	BU401203	---	---	---
Gga.2190.2.S1_a_at	1562.31	409.3	-1.932	1.932	-3.817	PPP-PPP		2.3	1	0.0168	0.0168		0.0007	suppressor of cytokine signaling 2	gga.2190	395219	SOCS2	AF540005.1	7242 // intracellular signaling cascade // inferred from electronic annotation	---	---
GgaAffx.20265.1.S1_at	103.67	27.32	-1.924	1.924	-3.794	PAA-AAA		1.4	8	0.0503	0.0865		0.0155	GgaAffx.20265.1.S1_at
Gga.555.1.S1_at	2051.2	550.56	-1.897	1.897	-3.726	PPP-PPP		2.3	1	0.0168	0.0168		0.0001	paired box gene 7	gga.555	395942	PAX7	NM_205065.1	6350 // transcription // inferred from electronic annotation /// 6355 // regulation of transcription, DNA-dependent // inferred from electronic annotation /// 7275 // development // inferred from electronic annotation /// 45449 // regulation of transcripti	5634 // nucleus // inferred from electronic annotation	3677 // DNA binding // inferred from electronic annotation /// 3700 // transcription factor activity // inferred from electronic annotation
Gga.206.1.S1_at	140.4	37.99	-1.886	1.886	-3.695	PPP-APA		2.3	1	0.0168	0.0168		0.0021	Zic family member 3 heterotaxy 1 (odd-paired homolog, Drosophila)	gga.206	374276	ZIC3	AF188736.1	---	---	---
Gga.3477.1.S2_at	1015.01	274.82	-1.885	1.885	-3.693	PPP-PPP		1.7	5	0.0332	0.0648		0.0079	fibroblast growth factor receptor 2 (bacteria-expressed kinase, keratinocyte growth factor receptor, craniofacial dysostosis 1, Crouzon syndrome, Pfeiffer syndrome, Jackson-Weiss syndrome)	gga.3477	396259	FGFR2	BU330174	6468 // protein amino acid phosphorylation // inferred from electronic annotation	16021 // integral to membrane // inferred from electronic annotation	166 // nucleotide binding // inferred from electronic annotation /// 4672 // protein kinase activity // inferred from electronic annotation /// 4713 // protein-tyrosine kinase activity // inferred from electronic annotation /// 4872 // receptor activity //
Gga.18501.1.A1_at	103.35	28.38	-1.865	1.865	-3.642	AMA-PAA		1.4	8	0.0503	0.0865		0.015	Finished cDNA, clone ChEST630k16	gga.18501	---	---	BU296098	---	---	---
Gga.14703.1.S1_at	779.62	218	-1.838	1.838	-3.576	PPP-PPP		1.4	8	0.0503	0.0865		0.0143	SP8	gga.14703	---	---	CR387123.1	---	5634 // nucleus // inferred from electronic annotation	3676 // nucleic acid binding // inferred from electronic annotation /// 8270 // zinc ion binding // inferred from electronic annotation /// 46872 // metal ion binding // inferred from electronic annotation
GgaAffx.2718.1.S1_at	4158.87	1170.35	-1.829	1.829	-3.554	PPP-PPP		2.3	1	0.0168	0.0168		0.0001	Protogenin	gga.29783	415407	protogenin	ENSGALT00000006954.1	6941 // striated muscle contraction // inferred from electronic annotation /// 7155 // cell adhesion // inferred from electronic annotation /// 7517 // muscle development // inferred from electronic annotation	5863 // striated muscle thick filament // inferred from electronic annotation /// 16020 // membrane // inferred from electronic annotation	5515 // protein binding // inferred from electronic annotation
Gga.9670.1.S1_at	450.01	126.7	-1.828	1.828	-3.552	PPP-PPP		2.3	1	0.0168	0.0168		0.0001	fumarylacetoacetate hydrolase (fumarylacetoacetase)	gga.9670	415482	FAH	BX935011.1	---	---	---
GgaAffx.10436.2.S1_at	359.9	101.65	-1.824	1.824	-3.541	PPP-PPP		2.3	1	0.0168	0.0168		0.0026	GgaAffx.10436.2.S1_at
Gga.3676.1.S1_at	704.27	199.48	-1.82	1.82	-3.531	PPP-PPP		2.3	1	0.0168	0.0168		0.0014	N-acetylgalactosamine 4-sulfate 6-O-sulfotransferase	gga.3676	423952	LOC423952	AJ441642	---	---	---
Gga.17183.1.S1_at	414.4	117.71	-1.816	1.816	-3.521	PPP-PMA		2.3	1	0.0168	0.0168		0.0001	Finished cDNA, clone ChEST397p8	gga.17183	---	---	CB016662	---	---	---
Gga.5838.1.A1_at	146.34	41.78	-1.809	1.809	-3.503	PMP-APA		1.1	11	0.0812	0.1412		0.0335	---	---	---	---	BU239626	---	---	---
Gga.11766.2.S1_a_at	324.13	97.13	-1.739	1.739	-3.337	PAP-AAA		1.9	3	0.0236	0.0372		0.0044	Norrie disease (pseudoglioma)	gga.11766	418560	NDP	BX935162.1	---	---	---
Gga.1819.1.S1_at	164.6	49.72	-1.727	1.727	-3.31	PMP-AAA		2.3	1	0.0168	0.0168		0.0001	deiodinase, iodothyronine, type II	gga.1819	373903	DIO2	NM_204114.1	6590 // thyroid hormone generation // inferred from direct assay /// 42446 // hormone biosynthesis // inferred from electronic annotation	16021 // integral to membrane // inferred from electronic annotation /// 16021 // integral to membrane // non-traceable author statement	4800 // thyroxine 5'-deiodinase activity // inferred from direct assay /// 4800 // thyroxine 5'-deiodinase activity // inferred from electronic annotation /// 8430 // selenium binding // inferred from electronic annotation /// 16491 // oxidoreductase activ
Gga.19953.1.S1_at	414.16	125.21	-1.726	1.726	-3.308	PPP-PPP		1.8	4	0.0277	0.0556		0.0057	similar to Enkurin	gga.19953	420498	LOC420498	CR407347.1	---	---	---
Gga.3615.1.S1_at	267.39	82.62	-1.694	1.694	-3.236	PPP-PAA		1.3	9	0.0579	0.1141		0.0156	follistatin	gga.3615	396119	FST	NM_205200.1	---	---	---
GgaAffx.21637.1.S1_s_at	466.12	145.44	-1.68	1.68	-3.205	PPP-PAP		1.9	3	0.0236	0.0372		0.0042	GgaAffx.21637.1.S1_s_at
Gga.9721.1.S1_a_at	88.34	27.72	-1.672	1.672	-3.186	PPP-AAA		1.7	5	0.0332	0.0648		0.0069	Finished cDNA, clone ChEST166c20	gga.9721	---	---	BX935606.2	---	---	---
Gga.2977.1.S1_at	1629.56	515.14	-1.661	1.661	-3.163	PPP-PPP		1.1	11	0.0812	0.1412		0.0332	protein tyrosine phosphatase, receptor-type, Z polypeptide 1	gga.2977	396403	PTPRZ1	NM_205431.1	6470 // protein amino acid dephosphorylation // inferred from electronic annotation	---	4721 // phosphoprotein phosphatase activity // inferred from electronic annotation /// 4725 // protein tyrosine phosphatase activity // inferred from electronic annotation /// 16787 // hydrolase activity // inferred from electronic annotation
Gga.5171.1.S1_at	258.82	82.25	-1.654	1.654	-3.147	PAA-AAA		1.9	3	0.0236	0.0372		0.0047	cadherin 5, type 2, VE-cadherin (vascular epithelium)	gga.5171	374068	CDH5	NM_204227.1	7156 // homophilic cell adhesion // inferred from electronic annotation	16020 // membrane // inferred from electronic annotation	5509 // calcium ion binding // inferred from electronic annotation
Gga.17638.1.S1_at	970.6	309.43	-1.649	1.649	-3.137	PPP-PPP		1.2	10	0.0697	0.1207		0.0237	similar to Cyclic-AMP-dependent transcription factor ATF-3 (Activating transcription factor 3)	---	421369	LOC421369	BU424207	---	---	---
Gga.959.1.S1_at	336.31	107.28	-1.648	1.648	-3.135	PPP-AAA		1.9	3	0.0236	0.0372		0.0041	SRY (sex determining region Y)-box 18	gga.959	374200	SOX18	NM_204309.1	6355 // regulation of transcription, DNA-dependent // inferred from electronic annotation	---	3677 // DNA binding // inferred from electronic annotation
Gga.2996.1.S2_at	1610.01	521.33	-1.627	1.627	-3.088	PPP-PPP		1.2	10	0.0697	0.1207		0.021	aldehyde dehydrogenase 1 family, member A2	gga.2996	395844	ALDH1A2	NM_204995.1	8152 // metabolism // inferred from electronic annotation	---	1758 // retinal dehydrogenase activity // inferred from electronic annotation /// 16491 // oxidoreductase activity // inferred from electronic annotation
GgaAffx.9643.1.S1_at	622.87	204.09	-1.61	1.61	-3.052	PPP-AAA		2.3	1	0.0168	0.0168		0.0014	proprotein convertase PC6	gga.247	395456	PC6	ENSGALT00000024469.1	6508 // proteolysis // inferred from electronic annotation	---	4289 // subtilase activity // inferred from electronic annotation
Gga.18882.1.S1_at	187.28	61.71	-1.602	1.602	-3.035	PPP-AAA		1.9	3	0.0236	0.0372		0.0042	Finished cDNA, clone ChEST463k4	gga.18882	---	---	BU246148	---	---	---
Gga.4978.2.S1_a_at	368.87	121.82	-1.598	1.598	-3.028	PPP-PMA		1.8	4	0.0277	0.0556		0.0058	calbindin 2, 29kDa (calretinin)	gga.4978	396255	CALB2	CR406046.1	---	---	5509 // calcium ion binding // inferred from electronic annotation
Gga.3828.1.S1_at	906.35	301.43	-1.588	1.588	-3.007	PPP-PPP		1.7	5	0.0332	0.0648		0.0067	embigin homolog (mouse)	gga.3828	395242	EMB	NM_204557.1	---	---	---
Gga.7920.1.S1_at	165.51	56.2	-1.558	1.558	-2.945	PAA-AAA		1.2	10	0.0697	0.1207		0.0215	Gga.7920.1.S1_at	---	---	---	CD215581	---	---	---
Gga.642.1.S1_a_at	136.94	46.71	-1.552	1.552	-2.932	PPP-AAA		1.9	3	0.0236	0.0372		0.0039	beaded filament structural protein 2, phakinin	gga.642	396141	BFSP2	NM_205218.1	---	5882 // intermediate filament // inferred from electronic annotation	5198 // structural molecule activity // inferred from electronic annotation
GgaAffx.22709.1.S1_at	94.57	32.41	-1.545	1.545	-2.918	PPA-PAA		1	12	0.0992	0.1959		0.0388	GgaAffx.22709.1.S1_at
GgaAffx.11584.1.S1_s_at	796.31	272.98	-1.545	1.545	-2.917	PPP-PPP		1.6	6	0.0361	0.0591		0.0084	GgaAffx.11584.1.S1_s_at
Gga.9762.1.S1_at	248.19	85.1	-1.544	1.544	-2.916	PAP-AAA		1.9	3	0.0236	0.0372		0.0045	Transcribed locus	gga.9762	---	---	CK613193	---	---	---
GgaAffx.3218.1.A1_at	150.21	51.56	-1.543	1.543	-2.913	AAP-AAA		1.2	10	0.0697	0.1207		0.0177	GgaAffx.3218.1.A1_at	---	---	---	ENSGALT00000008264.1	---	---	---
Gga.8178.1.S1_at	267.84	93.07	-1.525	1.525	-2.878	PPP-AAA		2.3	1	0.0168	0.0168		0.0002	Finished cDNA, clone ChEST509f21	gga.8178	---	---	BX933195.2	---	---	---
Gga.9032.1.S1_s_at	227.92	80.19	-1.507	1.507	-2.842	PPP-PPM		1.7	5	0.0332	0.0648		0.0066	similar to Zgc:77254	gga.9032	415710	LOC415710	BU396664	---	---	166 // nucleotide binding // inferred from electronic annotation /// 3676 // nucleic acid binding // inferred from electronic annotation /// 3723 // RNA binding // inferred from electronic annotation
Gga.2612.1.S1_at	485.39	171.16	-1.504	1.504	-2.836	PPP-PPP		2.3	1	0.0168	0.0168		0.0014	keratin 19	gga.2612	395861	KRT19	NM_205009.1	---	5882 // intermediate filament // inferred from electronic annotation	5198 // structural molecule activity // inferred from electronic annotation
GgaAffx.9641.1.S1_at	293.4	103.46	-1.504	1.504	-2.836	PPP-AAA		1.7	5	0.0332	0.0648		0.007	proprotein convertase PC6	gga.247	395456	PC6	ENSGALT00000024468.1	6508 // proteolysis // inferred from electronic annotation	---	4289 // subtilase activity // inferred from electronic annotation
Gga.8838.1.S1_at	482.29	171.23	-1.494	1.494	-2.817	PPP-MMP		1.8	4	0.0277	0.0556		0.005	Finished cDNA, clone ChEST77l19	gga.8838	---	---	CD730582	---	---	---
Gga.2606.1.S1_x_at	1054.51	374.95	-1.492	1.492	-2.812	PPP-PPP		1.2	10	0.0697	0.1207		0.0221	Finished cDNA, clone ChEST380k16	gga.2606	---	---	BU320234	---	---	---
Gga.13060.1.S1_at	866.18	308.41	-1.49	1.49	-2.808	PPP-PAP		1.2	10	0.0697	0.1207		0.0216	Finished cDNA, clone ChEST291c15	gga.13060	---	---	CR354275.1	---	---	---
GgaAffx.20956.1.S1_at	452.47	161.21	-1.489	1.489	-2.807	PMP-AAA		2.3	1	0.0168	0.0168		0.0014	GgaAffx.20956.1.S1_at
Gga.19725.1.S1_at	78.85	28.24	-1.481	1.481	-2.792	PAP-AAA		1.2	10	0.0697	0.1207		0.0185	Finished cDNA, clone ChEST653g24	gga.19725	---	---	CR406602.1	---	---	---
Gga.4293.1.S1_at	401.16	145.99	-1.458	1.458	-2.748	PPP-AAA		2.3	1	0.0168	0.0168		0.0007	d-cry	gga.4293	396498	LOC396498	NM_205501.1	---	---	3824 // catalytic activity // inferred from electronic annotation /// 5212 // structural constituent of eye lens // inferred from electronic annotation
Gga.2073.1.S1_at	858.77	312.57	-1.458	1.458	-2.747	PPP-PAP		0.9	13	0.124	0.2488		0.0471	alpha-1 collagen (I)	gga.2073	395532	LOC395532	CD214476	6817 // phosphate transport // inferred from electronic annotation	5578 // extracellular matrix (sensu Metazoa) // inferred from electronic annotation /// 5581 // collagen // inferred from electronic annotation /// 5737 // cytoplasm // inferred from electronic annotation	5198 // structural molecule activity // inferred from electronic annotation /// 5201 // extracellular matrix structural constituent // inferred from electronic annotation
Gga.4947.1.S1_at	1485.77	543.5	-1.451	1.451	-2.734	PPP-PPP		2.3	1	0.0168	0.0168		0.0011	oligodendrocyte transcription factor 3	gga.4947	428612	OLIG3	AF411041.1	6350 // transcription // inferred from electronic annotation /// 6355 // regulation of transcription, DNA-dependent // inferred from electronic annotation /// 45449 // regulation of transcription // inferred from electronic annotation	5634 // nucleus // inferred from electronic annotation	3677 // DNA binding // inferred from electronic annotation /// 30528 // transcription regulator activity // inferred from electronic annotation
Gga.6382.1.S1_s_at	522.44	191.5	-1.448	1.448	-2.728	PPP-PPP		2.3	1	0.0168	0.0168		0.0003	Finished cDNA, clone ChEST36g18	gga.6382	---	---	BX262650	---	---	---
Gga.4977.1.S1_at	1375.19	507.19	-1.439	1.439	-2.711	PPP-PPP		1.6	6	0.0361	0.0591		0.0078	msh homeo box homolog 2 (Drosophila)	gga.4977	395245	MSX2	NM_204559.1	6355 // regulation of transcription, DNA-dependent // inferred from electronic annotation /// 7275 // development // inferred from electronic annotation /// 45449 // regulation of transcription // inferred from electronic annotation	5634 // nucleus // inferred from electronic annotation	3677 // DNA binding // inferred from electronic annotation /// 3700 // transcription factor activity // inferred from electronic annotation
Gga.15269.1.S1_at	125.2	46.2	-1.438	1.438	-2.71	PPP-AAA		1	12	0.0992	0.1959		0.0384	Finished cDNA, clone ChEST797i13	gga.15269	---	---	CR385224.1	---	---	---
Gga.2606.1.S1_at	1025.59	378.96	-1.436	1.436	-2.706	PPP-PPP		1.3	9	0.0579	0.1141		0.0157	Finished cDNA, clone ChEST380k16	gga.2606	---	---	BU320234	---	---	---
Gga.8030.1.S1_at	339.91	125.93	-1.433	1.433	-2.699	PAP-AAA		1.7	5	0.0332	0.0648		0.0063	tissue factor pathway inhibitor 2	gga.8030	420561	TFPI2	BX934121.2	---	---	---
Gga.10120.1.S1_s_at	290.7	108.12	-1.427	1.427	-2.689	PPP-PMA		1.8	4	0.0277	0.0556		0.0055	similar to L-gulono-gamma-lactone oxidase precursor	gga.7569	421999	LOC421999	BX935469.2	---	---	---
Gga.16274.3.S1_a_at	1026.88	384.02	-1.419	1.419	-2.674	PPP-PPP		2.3	1	0.0168	0.0168		0.0008	Finished cDNA, clone ChEST189e2	gga.16274	---	---	CR388862.1	---	---	---
Gga.3928.1.S1_at	194.57	72.85	-1.417	1.417	-2.671	PPP-PPP		1.4	8	0.0503	0.0865		0.0112	hyaluronan and proteoglycan link protein 1	gga.3928	396475	HAPLN1	NM_205482.1	7155 // cell adhesion // inferred from electronic annotation	5578 // extracellular matrix (sensu Metazoa) // inferred from electronic annotation	5540 // hyaluronic acid binding // inferred from electronic annotation
GgaAffx.20104.1.S1_s_at	169.41	63.7	-1.411	1.411	-2.66	PPP-MAP		0.9	13	0.124	0.2488		0.0492	GgaAffx.20104.1.S1_s_at
Gga.3378.1.S1_at	784.81	296.07	-1.406	1.406	-2.651	PPP-PPP		1.5	7	0.0444	0.1043		0.009	odz, odd Oz/ten-m homolog 4 (Drosophila)	gga.3378	395406	ODZ4	BU417783	---	---	---
Gga.1479.1.S1_at	4058.02	1549.3	-1.389	1.389	-2.619	PPP-PPP		2.3	1	0.0168	0.0168		0.0003	pleiotrophin (heparin binding growth factor 8, neurite growth-promoting factor 1)	---	418125	PTN	BU230100	---	---	---
Gga.2621.1.S1_at	261.35	99.92	-1.387	1.387	-2.616	PPP-AAA		2.3	1	0.0168	0.0168		0.001	Transcribed locus	gga.2621	---	---	BU324088	---	---	---
Gga.4091.1.S2_a_at	1126.89	430.93	-1.387	1.387	-2.615	PPP-PPP		1.8	4	0.0277	0.0556		0.0049	myosin, light polypeptide kinase	gga.4091	396445	MYLK	NM_205459.1	6468 // protein amino acid phosphorylation // inferred from electronic annotation	---	166 // nucleotide binding // inferred from electronic annotation /// 287 // magnesium ion binding // inferred from electronic annotation /// 4672 // protein kinase activity // inferred from electronic annotation /// 4674 // protein serine/threonine kinase
GgaAffx.3871.1.S1_at	194.64	74.46	-1.386	1.386	-2.614	APP-AMP		1	12	0.0992	0.1959		0.0341	similar to otogelin; MLEMP	---	423075	LOC423075	ENSGALT00000010023.1	---	---	---
Gga.892.1.S1_at	2390.39	915.6	-1.384	1.384	-2.611	PPP-PPP		1.6	6	0.0361	0.0591		0.0078	inhibitor of DNA binding 1, dominant negative helix-loop-helix protein	gga.892	395282	ID1	NM_204590.1	45449 // regulation of transcription // inferred from electronic annotation	5634 // nucleus // inferred from electronic annotation	30528 // transcription regulator activity // inferred from electronic annotation
Gga.927.1.S1_at	433.13	166.33	-1.381	1.381	-2.604	PPP-PAA		1.3	9	0.0579	0.1141		0.0143	alanyl (membrane) aminopeptidase (aminopeptidase N, aminopeptidase M, microsomal aminopeptidase, CD13, p150)	gga.927	395667	ANPEP	NM_204861.1	6508 // proteolysis // inferred from electronic annotation	---	4177 // aminopeptidase activity // inferred from electronic annotation /// 4179 // membrane alanyl aminopeptidase activity // inferred from electronic annotation
Gga.16474.1.S1_at	2462.22	951.4	-1.372	1.372	-2.588	PPP-PPP		1.8	4	0.0277	0.0556		0.0051	Finished cDNA, clone ChEST72m20	gga.16474	---	---	BU321766	---	---	---
Gga.331.1.S1_at	265.51	103.26	-1.362	1.362	-2.571	PPM-AAA		1.1	11	0.0812	0.1412		0.0261	cytochrome P450, family 26, subfamily A, polypeptide 1	gga.331	408183	CYP26A1	AF199462.1	6118 // electron transport // inferred from electronic annotation	5783 // endoplasmic reticulum // inferred from electronic annotation /// 5792 // microsome // inferred from electronic annotation /// 16020 // membrane // inferred from electronic annotation	4497 // monooxygenase activity // inferred from electronic annotation /// 5506 // iron ion binding // inferred from electronic annotation /// 16491 // oxidoreductase activity // inferred from electronic annotation /// 20037 // heme binding // inferred from
Gga.7813.1.S1_at	732.99	285.42	-1.361	1.361	-2.568	PPP-AAP		1.5	7	0.0444	0.1043		0.0083	Finished cDNA, clone ChEST148d1	gga.7813	---	---	BX934874.1	---	---	---
Gga.15226.1.S1_s_at	550.76	214.56	-1.36	1.36	-2.567	PPP-PPP		1.1	11	0.0812	0.1412		0.0226	Finished cDNA, clone ChEST605c9 /// Finished cDNA, clone ChEST509f21	gga.15226	---	---	CR385394.1	---	---	---
Gga.3795.1.S1_at	2053.01	800.6	-1.359	1.359	-2.564	PPP-PPP		1.2	10	0.0697	0.1207		0.0189	SRY (sex determining region Y)-box 3	gga.3795	374019	SOX3	NM_204195.1	6350 // transcription // inferred from electronic annotation /// 6355 // regulation of transcription, DNA-dependent // inferred from electronic annotation	5634 // nucleus // inferred from electronic annotation	3677 // DNA binding // inferred from electronic annotation
Gga.11985.1.S1_at	199.06	77.73	-1.357	1.357	-2.561	PPP-PAP		1	12	0.0992	0.1959		0.0336	ELMO domain containing 1	gga.11985	418971	ELMOD1	BU445814	---	---	---
GgaAffx.8761.1.S1_at	166.47	65.08	-1.355	1.355	-2.558	PAP-AAA		1.1	11	0.0812	0.1412		0.0256	pleiomorphic adenoma gene-like 1	gga.2750	421664	PLAGL1	ENSGALT00000022343.1	---	---	---
Gga.1479.2.S1_a_at	1392.72	548.68	-1.344	1.344	-2.538	PPP-PPP		2.3	1	0.0168	0.0168		0.0004	pleiotrophin (heparin binding growth factor 8, neurite growth-promoting factor 1)	---	418125	PTN	BU134777	---	---	---
Gga.2668.4.S1_a_at	297.3	117.25	-1.342	1.342	-2.536	PPP-PAA		1.2	10	0.0697	0.1207		0.0163	Retinoic acid receptor, beta	gga.2668	396266	RARB	AF220162.1	6350 // transcription // inferred from electronic annotation /// 6355 // regulation of transcription, DNA-dependent // inferred from electronic annotation	5634 // nucleus // inferred from electronic annotation	3677 // DNA binding // inferred from electronic annotation /// 3700 // transcription factor activity // inferred from electronic annotation /// 3707 // steroid hormone receptor activity // inferred from electronic annotation /// 3708 // retinoic acid recep
GgaAffx.26669.1.S1_s_at	274.12	108.44	-1.338	1.338	-2.528	PPP-PAA		1.9	3	0.0236	0.0372		0.0032	GgaAffx.26669.1.S1_s_at
GgaAffx.26475.1.S1_s_at	803.09	318.52	-1.334	1.334	-2.521	PPP-PPP		1.5	7	0.0444	0.1043		0.0086	GgaAffx.26475.1.S1_s_at
Gga.8349.1.S1_at	366.86	145.56	-1.334	1.334	-2.52	PPP-PAA		1.9	3	0.0236	0.0372		0.0027	Gga.8349.1.S1_at	---	---	---	BX277266	---	---	---
Gga.7449.1.S1_at	385.11	152.8	-1.334	1.334	-2.52	PPP-AAA		1.8	4	0.0277	0.0556		0.0048	apical protein 2	gga.7449	416335	LOC416335	BX265106	---	---	---
GgaAffx.21785.1.S1_s_at	203.17	80.81	-1.33	1.33	-2.514	PPP-APA		2.3	1	0.0168	0.0168		0.001	GgaAffx.21785.1.S1_s_at
Gga.19380.1.S1_at	387.51	154.47	-1.327	1.327	-2.509	PPA-AAA		0.9	13	0.124	0.2488		0.0412	Finished cDNA, clone ChEST727i4	gga.19380	---	---	CR406817.1	---	---	---
Gga.16213.1.S1_at	510.96	203.82	-1.326	1.326	-2.507	PPP-PPP		2.1	2	0.0198	0.0347		0.0021	Finished cDNA, clone ChEST532c9	gga.16213	---	---	CR387761.1	---	---	---
Gga.18505.1.S1_s_at	328.84	131.23	-1.325	1.325	-2.506	PPP-PPP		2.3	1	0.0168	0.0168		0.0008	similar to mKIAA2016 protein	---	421648	LOC421648	BU299767	---	---	---
Gga.5445.1.S1_at	160.61	64.32	-1.32	1.32	-2.497	PPP-PPA		1.4	8	0.0503	0.0865		0.0099	Transcribed locus	gga.5445	---	---	BU274921	---	---	---
Gga.19290.1.S1_at	4369.35	1769.88	-1.304	1.304	-2.469	PPP-PPP		2.3	1	0.0168	0.0168		0.0001	Finished cDNA, clone ChEST911d11	gga.19290	---	---	BU270948	---	---	---
Gga.9465.1.S1_at	498.45	201.9	-1.304	1.304	-2.469	PAA-AAA		1.1	11	0.0812	0.1412		0.0281	opticin	gga.9465	395130	OPTC	NM_204473.1	---	---	---
Gga.9773.1.S1_s_at	309.08	125.83	-1.297	1.297	-2.456	PPP-PPP		1.5	7	0.0444	0.1043		0.0085	similar to Hypothetical protein MGC75808	gga.9773	420846	LOC420846	BU357779	---	---	166 // nucleotide binding // inferred from electronic annotation /// 3676 // nucleic acid binding // inferred from electronic annotation /// 3723 // RNA binding // inferred from electronic annotation
Gga.7837.1.S1_at	575.9	234.6	-1.296	1.296	-2.455	PAP-AAA		1.8	4	0.0277	0.0556		0.0047	Finished cDNA, clone ChEST368p18	gga.7837	---	---	BX930701.2	---	---	---
Gga.10619.1.S1_at	150.75	61.62	-1.291	1.291	-2.447	PPA-MAA		0.9	13	0.124	0.2488		0.0421	guanylate cyclase 1, soluble, alpha 3	gga.10619	422407	GUCY1A3	BI395021	---	---	---
GgaAffx.20417.1.S1_at	1376.27	563.24	-1.289	1.289	-2.443	PPP-PPP		1.2	10	0.0697	0.1207		0.0205	GgaAffx.20417.1.S1_at
GgaAffx.7180.1.S1_s_at	685.85	281.99	-1.282	1.282	-2.432	PPP-PPP		1.9	3	0.0236	0.0372		0.0028	GgaAffx.7180.1.S1_s_at
Gga.17882.1.S1_at	8041.21	3313.44	-1.279	1.279	-2.427	PPP-PPP		2.3	1	0.0168	0.0168		0	Finished cDNA, clone ChEST754j24	gga.17882	---	---	CR388955.1	---	---	---
Gga.3807.1.S2_s_at	262.65	108.38	-1.277	1.277	-2.423	PPP-AAA		1.1	11	0.0812	0.1412		0.0266	aldehyde dehydrogenase 1 family, member A3	gga.3807	395389	ALDH1A3	NM_204669.1	8152 // metabolism // inferred from electronic annotation	---	16491 // oxidoreductase activity // inferred from electronic annotation
GgaAffx.23381.3.S1_s_at	550.39	227.93	-1.272	1.272	-2.415	PPP-PPP		1.9	3	0.0236	0.0372		0.0029	GgaAffx.23381.3.S1_s_at
Gga.19953.1.S1_s_at	105.23	43.58	-1.272	1.272	-2.415	PPP-AAA		1	12	0.0992	0.1959		0.0365	similar to Enkurin	gga.19953	420498	LOC420498	CR407347.1	---	---	---
GgaAffx.20978.1.S1_s_at	342.9	142.35	-1.268	1.268	-2.409	PPP-PAP		0.9	13	0.124	0.2488		0.0498	GgaAffx.20978.1.S1_s_at
Gga.11240.1.S1_s_at	144.33	60.05	-1.265	1.265	-2.403	PAA-AAA		1.3	9	0.0579	0.1141		0.0127	similar to crumbs homolog 1 isoform II precursor; crumbs (Drosophila) homolog 1	gga.11240	417104	LOC417104	BU231901	---	---	---
Gga.1030.1.S1_at	2335.96	972.39	-1.264	1.264	-2.402	PPP-PPP		2.3	1	0.0168	0.0168		0.0007	v-myc myelocytomatosis viral oncogene homolog (avian)	---	420332	MYC	AI980906	---	---	---
GgaAffx.12253.1.S1_at	84.86	35.4	-1.261	1.261	-2.397	PPP-PMA		0.9	13	0.124	0.2488		0.0435	GgaAffx.12253.1.S1_at
Gga.165.1.S1_at	353.47	148.24	-1.254	1.254	-2.384	PPP-PPP		0.9	13	0.124	0.2488		0.0397	SRY (sex determining region Y)-box 1	gga.165	374240	SOX1	NM_204333.1	6355 // regulation of transcription, DNA-dependent // inferred from electronic annotation	---	3677 // DNA binding // inferred from electronic annotation
Gga.14235.1.S1_at	715.9	300.43	-1.253	1.253	-2.383	PPP-PPP		1.8	4	0.0277	0.0556		0.0044	Finished cDNA, clone ChEST125m3	gga.14235	---	---	BU138053	---	---	---
Gga.207.1.S1_at	2823.44	1185.56	-1.252	1.252	-2.382	PPP-PAA		2.3	1	0.0168	0.0168		0.0004	ZIC2 gene, partial 3'UTR	gga.207	---	---	AF188735.1	---	---	---
GgaAffx.22396.1.S1_at	154.17	64.81	-1.25	1.25	-2.379	PPP-MMP		1.1	11	0.0812	0.1412		0.0224	GgaAffx.22396.1.S1_at
Gga.15405.1.S1_at	397.77	167.31	-1.249	1.249	-2.377	PPP-PAP		2.3	1	0.0168	0.0168		0.0007	Finished cDNA, clone ChEST479b3	gga.15405	---	---	BU351343	---	---	---
Gga.14195.1.S1_at	55.63	23.44	-1.247	1.247	-2.373	PMP-AAA		1	12	0.0992	0.1959		0.0343	Finished cDNA, clone ChEST542c3	gga.14195	---	---	BU472478	---	---	---
GgaAffx.7026.1.S1_at	129.32	54.53	-1.246	1.246	-2.371	PAP-AAP		1.5	7	0.0444	0.1043		0.009	similar to LOC126731	---	421533	LOC421533	ENSGALT00000018061.1	---	---	---
GgaAffx.6051.1.S1_at	140.69	59.41	-1.244	1.244	-2.368	AAP-AAA		1.1	11	0.0812	0.1412		0.0259	GgaAffx.6051.1.S1_at	---	---	---	ENSGALT00000015690.1	---	---	---
Gga.2555.1.S1_at	104.61	44.29	-1.24	1.24	-2.362	PPP-AAA		2.3	1	0.0168	0.0168		0.0007	Finished cDNA, clone ChEST124l16	gga.2555	---	---	BU125519	---	---	---
Gga.9686.2.S1_a_at	401.71	170.23	-1.239	1.239	-2.36	PPP-PPA		1.3	9	0.0579	0.1141		0.012	similar to retinol dehydrogenase 10	---	420183	LOC420183	BX933788.2	---	---	---
Gga.7807.1.S1_at	897.54	381.24	-1.235	1.235	-2.354	PPP-PPP		1.3	9	0.0579	0.1141		0.0118	Finished cDNA, clone ChEST51k2	gga.7807	---	---	BU478972	---	---	---
GgaAffx.8015.1.S1_at	349.71	149.19	-1.229	1.229	-2.344	PAP-AAA		1.1	11	0.0812	0.1412		0.0268	similar to regulatory factor X4 isoform a; transcription factor NYD-sp10	---	418070	LOC418070	ENSGALT00000020640.1	---	---	---
GgaAffx.1959.1.S1_at	120.2	51.32	-1.228	1.228	-2.342	APP-AAA		0.9	13	0.124	0.2488		0.0451	carbamoyl-phosphate synthetase 1, mitochondrial	gga.22962	428994	CPS1	ENSGALT00000004912.1	6526 // arginine biosynthesis // inferred from electronic annotation /// 6541 // glutamine metabolism // inferred from electronic annotation /// 6807 // nitrogen compound metabolism // inferred from electronic annotation /// 8152 // metabolism // inferred	5737 // cytoplasm // inferred from electronic annotation	3824 // catalytic activity // inferred from electronic annotation /// 4086 // carbamoyl-phosphate synthase activity // inferred from electronic annotation /// 5524 // ATP binding // inferred from electronic annotation /// 16874 // ligase activity // inferr
Gga.546.1.S1_s_at	332.32	142.24	-1.224	1.224	-2.336	PPP-AAA		1.9	3	0.0236	0.0372		0.0032	potassium inwardly-rectifying channel, subfamily J, member 5	gga.546	395925	KCNJ5	CN232897	6813 // potassium ion transport // inferred from electronic annotation	16020 // membrane // inferred from electronic annotation	5242 // inward rectifier potassium channel activity // inferred from electronic annotation /// 15467 // G-protein activated inward rectifier potassium channel activity // inferred from electronic annotation
Gga.11590.1.S1_a_at	371.19	158.99	-1.223	1.223	-2.335	PAM-AAA		2.3	1	0.0168	0.0168		0.0005	Finished cDNA, clone ChEST840g1	gga.11590	---	---	BU485830	---	---	---
GgaAffx.24233.1.S1_at	2046.15	877.55	-1.221	1.221	-2.332	PPP-PPP		1.7	5	0.0332	0.0648		0.0054	GgaAffx.24233.1.S1_at
Gga.9178.1.S1_at	4791.93	2058.15	-1.219	1.219	-2.328	PPP-PPP		1.5	7	0.0444	0.1043		0.008	Transcribed locus	gga.9178	---	---	CF251378	---	---	---
Gga.13421.1.A1_at	692.28	297.69	-1.218	1.218	-2.326	PPP-PPP		2.3	1	0.0168	0.0168		0.0001	Similar to LOC283464 protein	gga.13421	417789	---	CR352741.1	16051 // carbohydrate biosynthesis // inferred from electronic annotation	---	16758 // transferase activity, transferring hexosyl groups // inferred from electronic annotation
GgaAffx.22495.1.S1_at	137.99	59.66	-1.21	1.21	-2.313	PPA-APA		1.3	9	0.0579	0.1141		0.0124	GgaAffx.22495.1.S1_at
Gga.10094.1.S1_at	53.77	23.26	-1.209	1.209	-2.312	PMP-PAA		1.3	9	0.0579	0.1141		0.0128	Finished cDNA, clone ChEST81c1	gga.10094	---	---	BX935583.2	---	---	---
GgaAffx.11575.1.S1_s_at	566.12	245.25	-1.207	1.207	-2.308	PPP-PPP		2.3	1	0.0168	0.0168		0.0013	GgaAffx.11575.1.S1_s_at
GgaAffx.9674.1.S1_at	84.3	36.52	-1.207	1.207	-2.308	APA-AAA		1	12	0.0992	0.1959		0.0297	similar to nucleolar protein 4; nucleolar localized protein	---	421103	LOC421103	ENSGALT00000024521.1	---	---	---
GgaAffx.5706.1.S1_s_at	640.41	278.32	-1.202	1.202	-2.301	PPP-PPP		1.3	9	0.0579	0.1141		0.0133	GgaAffx.5706.1.S1_s_at
GgaAffx.9429.4.A1_at	140.65	61.17	-1.201	1.201	-2.299	PPA-AAA		2.3	1	0.0168	0.0168		0.0014	GgaAffx.9429.4.A1_at	---	---	---	ENSGALT00000023952.1	---	---	---
Gga.7779.1.S1_s_at	212.61	93.49	-1.185	1.185	-2.274	PPP-MMP		1.7	5	0.0332	0.0648		0.005	Finished cDNA, clone ChEST1014h19	gga.7779	---	---	BU308789	---	---	---
Gga.11929.1.S1_at	619.56	272.42	-1.185	1.185	-2.274	PPP-AAA		1.5	7	0.0444	0.1043		0.0077	similar to RIKEN cDNA A630065K24	gga.11929	419829	LOC419829	BU269058	---	---	---
Gga.18398.1.S1_s_at	177.13	77.91	-1.185	1.185	-2.274	PAP-AAA		1.5	7	0.0444	0.1043		0.0078	signal peptide, CUB domain, EGF-like 2	gga.20747	423049	SCUBE2	BU392947	---	---	---
AFFX-r2-Bs-lys-3_at	58.21	25.62	-1.184	1.184	-2.272	PAA-PAA		1.6	6	0.0361	0.0591		0.006	AFFX-r2-Bs-lys-3_at	---	---	---	AFFX-r2-Bs-lys-3	---	---	---
GgaAffx.12282.1.S1_s_at	2519.77	1110.11	-1.183	1.183	-2.27	PPP-PPP		1.7	5	0.0332	0.0648		0.0053	GgaAffx.12282.1.S1_s_at
GgaAffx.3200.1.S1_s_at	459.81	202.72	-1.182	1.182	-2.268	PPP-PPP		1.5	7	0.0444	0.1043		0.0071	GgaAffx.3200.1.S1_s_at
Gga.18092.1.S1_at	89.84	39.62	-1.181	1.181	-2.268	PAA-APA		1.1	11	0.0812	0.1412		0.024	Finished cDNA, clone ChEST807h20	gga.18092	---	---	CR389639.1	---	---	---
Gga.8535.1.S2_at	649.87	286.74	-1.18	1.18	-2.266	PPP-PPP		2.3	1	0.0168	0.0168		0.0004	unc-5 homolog C (C. elegans)	gga.8535	395101	UNC5C	BU221163	7165 // signal transduction // inferred from electronic annotation /// 7275 // development // inferred from electronic annotation	16021 // integral to membrane // inferred from electronic annotation	4872 // receptor activity // inferred from electronic annotation /// 5515 // protein binding // inferred from electronic annotation
GgaAffx.8681.1.S1_s_at	2414.32	1073.65	-1.169	1.169	-2.249	PPP-PPP		2.3	1	0.0168	0.0168		0.0004	GgaAffx.8681.1.S1_s_at
GgaAffx.23423.2.S1_s_at	827.67	368.35	-1.168	1.168	-2.247	PPP-AAA		1.4	8	0.0503	0.0865		0.0092	GgaAffx.23423.2.S1_s_at
Gga.1378.1.S1_s_at	320.17	142.61	-1.167	1.167	-2.245	PPP-PPP		1.3	9	0.0579	0.1141		0.012	similar to KIAA0744 protein	gga.1378	420599	LOC420599	AJ445561	---	---	---
Gga.241.1.S1_at	239.04	106.55	-1.166	1.166	-2.243	PPP-PPP		1.4	8	0.0503	0.0865		0.0088	DEAD (Asp-Glu-Ala-Asp) box polypeptide 4	gga.241	395447	DDX4	NM_204708.1	---	---	166 // nucleotide binding // inferred from electronic annotation /// 3676 // nucleic acid binding // inferred from electronic annotation /// 4386 // helicase activity // inferred from electronic annotation /// 5524 // ATP binding // inferred from electroni
Gga.18271.1.S1_at	210.11	93.69	-1.165	1.165	-2.243	PPP-PPA		0.9	13	0.124	0.2488		0.0425	Finished cDNA, clone ChEST36e13	gga.18271	---	---	CR390109.1	---	---	---
Gga.14494.1.S1_at	163.62	73.05	-1.163	1.163	-2.24	PPA-MAA		0.9	13	0.124	0.2488		0.0473	Finished cDNA, clone ChEST84b21	gga.14494	---	---	BU134659	---	---	---
Gga.15371.1.S1_at	418.09	187.28	-1.159	1.159	-2.232	PPP-PPP		1.8	4	0.0277	0.0556		0.0042	Gga.15371.1.S1_at	---	---	---	CD761221	---	---	---
GgaAffx.22637.1.S1_s_at	253.98	113.79	-1.158	1.158	-2.232	PPP-PAP		1.5	7	0.0444	0.1043		0.0072	GgaAffx.22637.1.S1_s_at
Gga.11602.1.S1_at	1404.05	628.93	-1.159	1.159	-2.232	PPP-PPP		1.1	11	0.0812	0.1412		0.0223	Transcribed locus	gga.11602	---	---	CK609063	---	---	---
Gga.5108.1.S1_at	58.7	26.41	-1.153	1.153	-2.223	PAA-AAA		1.2	10	0.0697	0.1207		0.0154	Embryo fibroblast (c342) lambda gt11 cDNA	gga.5108	---	---	BU377707	---	---	---
Gga.16606.1.S1_at	2387.82	1075.7	-1.15	1.15	-2.22	PPP-PPP		2.3	1	0.0168	0.0168		0.0002	Gga.16606.1.S1_at	---	---	---	BU279862	---	---	---
Gga.2672.2.S1_s_at	1594.66	719.69	-1.148	1.148	-2.216	PPP-PPP		2.3	1	0.0168	0.0168		0.0005	methylenetetrahydrofolate dehydrogenase (NADP+ dependent) 2, methenyltetrahydrofolate cyclohydrolase	gga.2672	426126	MTHFD2	CR387221.1	6730 // one-carbon compound metabolism // inferred from electronic annotation /// 9396 // folic acid and derivative biosynthesis // inferred from electronic annotation	5739 // mitochondrion // inferred from electronic annotation	287 // magnesium ion binding // inferred from electronic annotation /// 3824 // catalytic activity // inferred from electronic annotation /// 4477 // methenyltetrahydrofolate cyclohydrolase activity // inferred from electronic annotation /// 4487 // methyl
Gga.3158.1.S1_at	578.58	261.64	-1.145	1.145	-2.211	PAA-AAA		1.3	9	0.0579	0.1141		0.0136	visual system homeobox 1 homolog, CHX10-like (zebrafish)	gga.3158	395537	VSX1	NM_204769.1	6350 // transcription // inferred from electronic annotation /// 6355 // regulation of transcription, DNA-dependent // inferred from electronic annotation /// 7275 // development // inferred from electronic annotation /// 7600 // sensory perception // infe	5634 // nucleus // inferred from electronic annotation	3677 // DNA binding // inferred from electronic annotation /// 3700 // transcription factor activity // inferred from electronic annotation
GgaAffx.23423.1.S1_at	634.86	288.27	-1.139	1.139	-2.202	PPP-PPP		0.8	14	0.155	0.3081		0.0496	GgaAffx.23423.1.S1_at
Gga.18917.1.S1_s_at	2166.18	986.91	-1.134	1.134	-2.195	PPP-PPP		1.7	5	0.0332	0.0648		0.0045	Hypothetical protein, clone 9b22	gga.18917	---	---	CD215341	31032 // actomyosin structure organization and biogenesis // inferred from electronic annotation	---	3779 // actin binding // inferred from electronic annotation
Gga.6524.1.A1_at	1507.96	688.78	-1.13	1.13	-2.189	PPP-PPP		0.8	14	0.155	0.3081		0.049	Transcribed locus	gga.6524	---	---	BX276955	---	---	---
Gga.2287.1.S1_at	548.93	251.62	-1.125	1.125	-2.182	PPP-PPP		2.3	1	0.0168	0.0168		0.0004	Gga.2287.1.S1_at	---	---	---	BU433596	---	---	---
Gga.1481.1.S1_at	5879.82	2697.72	-1.124	1.124	-2.18	PPP-PPP		2.3	1	0.0168	0.0168		0.0014	Transcribed locus	gga.1481	---	---	AL586962	---	---	---
GgaAffx.8027.1.S1_at	360.58	165.47	-1.124	1.124	-2.179	PPP-MPP		0.8	14	0.155	0.3081		0.0485	similar to Doublecortin domain-containing protein 2 (RU2S protein)	---	420821	LOC420821	ENSGALT00000020678.1	---	---	---
GgaAffx.245.1.S1_at	1946.3	894.18	-1.122	1.122	-2.177	PPP-PPP		2.3	1	0.0168	0.0168		0.0005	lin-28 homolog (C. elegans)	gga.21004	428206	LIN28	ENSGALT00000000529.1	6355 // regulation of transcription, DNA-dependent // inferred from electronic annotation	---	3676 // nucleic acid binding // inferred from electronic annotation /// 3677 // DNA binding // inferred from electronic annotation
Gga.153.1.S2_at	543.6	250.17	-1.12	1.12	-2.173	PPP-PPP		1.7	5	0.0332	0.0648		0.005	Gga.153.1.S2_at	---	---	---	BU338683	---	---	---
Gga.2631.1.S1_at	198.14	91.35	-1.117	1.117	-2.169	PAP-AAA		1.5	7	0.0444	0.1043		0.0077	adrenal hyoplasia protein DAX1	gga.2631	395285	DAX1	NM_204593.1	6355 // regulation of transcription, DNA-dependent // inferred from electronic annotation	5634 // nucleus // inferred from electronic annotation	3677 // DNA binding // inferred from electronic annotation /// 3700 // transcription factor activity // inferred from electronic annotation /// 3707 // steroid hormone receptor activity // inferred from electronic annotation /// 4879 // ligand-dependent nu
GgaAffx.3298.1.S1_at	71.6	33.03	-1.116	1.116	-2.168	PPP-PAP		1	12	0.0992	0.1959		0.0278	GgaAffx.3298.1.S1_at	---	---	---	ENSGALT00000008473.1	---	---	---
Gga.16873.1.S1_at	641.15	295.89	-1.116	1.116	-2.167	PPP-PPP		1	12	0.0992	0.1959		0.0281	Finished cDNA, clone ChEST927g4	gga.16873	---	---	BU112810	---	---	---
Gga.10625.1.S1_at	163.06	75.31	-1.114	1.114	-2.165	PPP-AAP		1.8	4	0.0277	0.0556		0.0031	Finished cDNA, clone ChEST845f21	gga.10625	---	---	BX933157.1	---	---	---
Gga.13843.1.A1_at	88.59	40.92	-1.115	1.115	-2.165	PAA-PAA		1.1	11	0.0812	0.1412		0.0215	Finished cDNA, clone ChEST513p10	gga.13843	---	---	CR354179.1	---	---	---
Gga.16709.1.S1_at	7985.29	3692.14	-1.113	1.113	-2.163	PPP-PPP		2.3	1	0.0168	0.0168		0.0007	Finished cDNA, clone ChEST383m11	gga.16709	---	---	CR385608.1	---	---	---
Gga.1682.1.S1_a_at	4009.41	1858.69	-1.109	1.109	-2.157	PPP-PPP		1.5	7	0.0444	0.1043		0.0064	hypothetical gene supported by CR387752	gga.1682	417447	LOC417447	CR387752.1	---	---	---
Gga.17377.1.S1_at	226.98	105.32	-1.108	1.108	-2.155	PPP-PAM		1.2	10	0.0697	0.1207		0.0177	Finished cDNA, clone ChEST875e8	gga.17377	---	---	CR388738.1	---	---	---
Gga.18457.1.S1_at	790.37	368.03	-1.103	1.103	-2.148	PPP-PPP		1.9	3	0.0236	0.0372		0.002	Finished cDNA, clone ChEST629l13	gga.18457	---	---	BU339328	---	---	---
GgaAffx.3147.1.S1_at	105.29	49.13	-1.1	1.1	-2.143	APA-AAA		0.9	13	0.124	0.2488		0.0423	similar to testis protein TEX14	---	417625	LOC417625	ENSGALT00000008076.1	---	---	---
Gga.8597.1.S1_s_at	78.33	36.62	-1.097	1.097	-2.139	PAA-AAA		1.1	11	0.0812	0.1412		0.0257	similar to Glypican-5 precursor	---	429143	LOC429143	CD730299	---	---	---
GgaAffx.1354.1.S1_at	131.35	61.52	-1.094	1.094	-2.135	PAA-AAA		1.8	4	0.0277	0.0556		0.0033	GgaAffx.1354.1.S1_at	---	---	---	ENSGALT00000003185.1	---	---	---
Gga.14338.1.S1_at	339.84	160.78	-1.08	1.08	-2.114	PPP-PPP		1.7	5	0.0332	0.0648		0.0047	Finished cDNA, clone ChEST827a6	gga.14338	---	---	CR352511.1	---	---	---
GgaAffx.3352.1.S1_at	142.79	67.62	-1.078	1.078	-2.112	PAA-MAA		1.6	6	0.0361	0.0591		0.0052	similar to male sterility domain containing 2	gga.13541	423028	LOC423028	ENSGALT00000008586.1	---	---	---
Gga.14835.1.S1_at	322.42	152.68	-1.078	1.078	-2.112	PAP-MAA		1.5	7	0.0444	0.1043		0.0067	Finished cDNA, clone ChEST286i13	gga.14835	---	---	BU468873	---	---	---
Gga.19721.1.S1_at	982.62	466.66	-1.074	1.074	-2.106	PPP-PPP		2.3	1	0.0168	0.0168		0.0009	Finished cDNA, clone ChEST649m4	gga.19721	---	---	BM491960	---	---	---
GgaAffx.24329.1.S1_at	142.75	67.79	-1.074	1.074	-2.106	PPA-APA		1.1	11	0.0812	0.1412		0.0233	GgaAffx.24329.1.S1_at
Gga.10039.1.S1_at	36.52	17.35	-1.074	1.074	-2.105	PAP-AAA		1.2	10	0.0697	0.1207		0.0148	Finished cDNA, clone ChEST648g9	gga.10039	---	---	CK609616	---	---	---
GgaAffx.20264.1.S1_at	312.64	148.5	-1.074	1.074	-2.105	PPP-PPP		1.2	10	0.0697	0.1207		0.0181	GgaAffx.20264.1.S1_at
Gga.17032.1.S1_a_at	136.68	64.95	-1.073	1.073	-2.104	PPA-PAA		1.2	10	0.0697	0.1207		0.0171	Finished cDNA, clone ChEST212m10	gga.17032	---	---	AJ442989	---	---	---
Gga.11773.1.S1_s_at	209.09	99.71	-1.068	1.068	-2.097	PAP-PAM		1.9	3	0.0236	0.0372		0.0022	Finished cDNA, clone ChEST769p8	gga.11773	---	---	BX929910.1	---	---	---
Gga.13827.1.S1_at	119.71	57.31	-1.063	1.063	-2.089	PPP-PPA		1.4	8	0.0503	0.0865		0.0098	Finished cDNA, clone ChEST335c9	gga.13827	---	---	BU320401	---	---	---
Gga.768.1.S1_at	2202.6	1054.21	-1.063	1.063	-2.089	PPP-PPP		1.1	11	0.0812	0.1412		0.0214	TGFB-induced factor (TALE family homeobox)	gga.768	396339	TGIF	NM_205379.1	6350 // transcription // inferred from electronic annotation /// 6355 // regulation of transcription, DNA-dependent // inferred from electronic annotation /// 45449 // regulation of transcription // inferred from electronic annotation	5634 // nucleus // inferred from electronic annotation	3677 // DNA binding // inferred from electronic annotation /// 3700 // transcription factor activity // inferred from electronic annotation
Gga.9025.1.S1_at	358.03	172.2	-1.056	1.056	-2.079	PPP-PPP		1.5	7	0.0444	0.1043		0.006	similar to Complement C1r component precursor	---	418295	LOC418295	CD729503	---	---	---
GgaAffx.25413.1.A1_at	260.46	125.26	-1.056	1.056	-2.079	PPP-PPP		1.5	7	0.0444	0.1043		0.0061	GgaAffx.25413.1.A1_at
GgaAffx.20164.1.S1_at	2848.13	1370.77	-1.055	1.055	-2.078	PPP-PPP		2.3	1	0.0168	0.0168		0.0005	GgaAffx.20164.1.S1_at
GgaAffx.9275.1.S1_at	67.22	32.35	-1.055	1.055	-2.078	PAA-AAA		1.4	8	0.0503	0.0865		0.0097	similar to chromo-helicase-DNA-binding on the Z chromosome protein	---	427101	LOC427101	ENSGALT00000023602.1	---	---	---
GgaAffx.6003.1.S1_at	425.76	205.19	-1.053	1.053	-2.075	PPP-PPP		1.3	9	0.0579	0.1141		0.01	similar to REST/NRSF-interacting lim domain protein	---	417793	LOC417793	ENSGALT00000015558.1	---	---	---
Gga.13651.1.S1_at	914.63	442.05	-1.049	1.049	-2.069	PPP-PPP		1.2	10	0.0697	0.1207		0.0164	Finished cDNA, clone ChEST980a4	gga.13651	---	---	BX262497	---	---	---
Gga.1817.1.S1_at	2191.08	1059.36	-1.048	1.048	-2.068	PPP-PPP		1.2	10	0.0697	0.1207		0.0138	sal-like 1 (Drosophila)	gga.1817	395446	SALL1	NM_204707.1	---	5634 // nucleus // inferred from electronic annotation	5515 // protein binding // inferred from physical interaction /// 42802 // protein self binding // inferred from physical interaction /// 3676 // nucleic acid binding // inferred from electronic annotation /// 8270 // zinc ion binding // inferred from elec
GgaAffx.12091.1.S1_at	976.9	472.51	-1.048	1.048	-2.067	PPP-PPP		1.1	11	0.0812	0.1412		0.0236	GgaAffx.12091.1.S1_at
GgaAffx.1771.1.S1_s_at	1310.7	634.44	-1.047	1.047	-2.066	PPP-PPP		2.1	2	0.0198	0.0347		0.0014	GgaAffx.1771.1.S1_s_at
Gga.2464.1.S1_at	238.78	115.68	-1.045	1.045	-2.064	PPP-AMA		1.6	6	0.0361	0.0591		0.0046	glutamate-ammonia ligase (glutamine synthetase)	gga.2464	396489	GLUL	S45408.1	6542 // glutamine biosynthesis // inferred from electronic annotation /// 6807 // nitrogen compound metabolism // inferred from electronic annotation	---	4356 // glutamate-ammonia ligase activity // inferred from electronic annotation /// 16874 // ligase activity // inferred from electronic annotation
GgaAffx.10050.1.S1_at	305.22	148.31	-1.041	1.041	-2.058	PAA-AAA		2.3	1	0.0168	0.0168		0.0002	GgaAffx.10050.1.S1_at
Gga.1442.1.S1_at	491.24	238.68	-1.041	1.041	-2.058	PPP-PAP		0.9	13	0.124	0.2488		0.0368	Transcribed locus	gga.1442	---	---	BU334089	---	---	---
Gga.19325.1.S1_at	805.85	391.69	-1.041	1.041	-2.057	PMA-AAA		2.3	1	0.0168	0.0168		0.0008	similar to L-gulono-gamma-lactone oxidase precursor	gga.7569	421999	LOC421999	CR407375.1	---	---	---
Gga.13129.1.S1_s_at	146.92	71.44	-1.04	1.04	-2.057	PPP-PAA		1.8	4	0.0277	0.0556		0.0033	Finished cDNA, clone ChEST304i14 /// Finished cDNA, clone ChEST431b22	gga.13129	---	---	BU326198	---	---	---
GgaAffx.22744.1.S1_at	643.1	312.83	-1.04	1.04	-2.056	PPP-PPP		1.6	6	0.0361	0.0591		0.0049	GgaAffx.22744.1.S1_at
Gga.2464.1.S2_at	910.71	443.37	-1.038	1.038	-2.054	PPP-PPP		1.5	7	0.0444	0.1043		0.0066	glutamate-ammonia ligase (glutamine synthetase)	gga.2464	396489	GLUL	NM_205493.1	6542 // glutamine biosynthesis // inferred from electronic annotation /// 6807 // nitrogen compound metabolism // inferred from electronic annotation	---	4356 // glutamate-ammonia ligase activity // inferred from electronic annotation /// 16874 // ligase activity // inferred from electronic annotation
Gga.2828.1.S1_at	193.25	94.22	-1.036	1.036	-2.051	PAM-AAA		1.8	4	0.0277	0.0556		0.0027	Transcribed locus	gga.2828	---	---	BU285179	---	---	---
Gga.6738.1.S1_at	128.26	62.56	-1.036	1.036	-2.05	PAA-AAA		0.9	13	0.124	0.2488		0.0383	Transcribed locus	gga.6738	---	---	BX267071	---	---	---
Gga.19185.1.S1_at	304.74	148.76	-1.035	1.035	-2.049	PPP-PPM		1.2	10	0.0697	0.1207		0.0161	Finished cDNA, clone ChEST727i5	gga.19185	---	---	BU398752	---	---	---
Gga.2679.2.S1_a_at	813.1	397.28	-1.033	1.033	-2.047	PPP-PPP		1.8	4	0.0277	0.0556		0.0033	fibulin 1	gga.2679	373979	FBLN1	AF051400.1	---	5576 // extracellular region // inferred from electronic annotation /// 5578 // extracellular matrix (sensu Metazoa) // inferred from electronic annotation	5509 // calcium ion binding // inferred from electronic annotation
Gga.12310.1.S1_at	511.75	250.26	-1.032	1.032	-2.045	PPP-PPP		1.5	7	0.0444	0.1043		0.0058	similar to gamma butyrobetaine hydroxylase	---	428606	LOC428606	BX950437.1	---	---	---
Gga.3125.1.S1_at	3485.7	1705.19	-1.032	1.032	-2.044	PPP-PPP		1.2	10	0.0697	0.1207		0.0137	inhibitor of DNA binding 2, dominant negative helix-loop-helix protein	gga.3125	395852	ID2	AF049135.1	45449 // regulation of transcription // inferred from electronic annotation	5634 // nucleus // inferred from electronic annotation	30528 // transcription regulator activity // inferred from electronic annotation
GgaAffx.8765.3.S1_s_at	1642.29	804.76	-1.029	1.029	-2.041	PPP-PPP		2.3	1	0.0168	0.0168		0.0008	GgaAffx.8765.3.S1_s_at
Gga.15977.1.S1_at	226.9	111.25	-1.028	1.028	-2.04	PPP-PPP		1.4	8	0.0503	0.0865		0.0094	Finished cDNA, clone ChEST536f17	gga.15977	---	---	BU314599	---	---	---
GgaAffx.3525.1.S1_at	723.46	355.29	-1.026	1.026	-2.036	PPP-PPP		2.3	1	0.0168	0.0168		0.0006	similar to tissue factor	---	429084	LOC429084	ENSGALT00000009017.1	---	---	---
Gga.6781.1.S1_at	707.75	347.55	-1.026	1.026	-2.036	PPP-PPP		2.3	1	0.0168	0.0168		0.0007	Transcribed locus, moderately similar to NP_077131.2 FK506 binding protein 11 [Mus musculus]	gga.6781	---	---	BU254830	---	---	---
Gga.13141.3.S1_s_at	234.26	115.4	-1.021	1.021	-2.03	AMP-AAA		1	12	0.0992	0.1959		0.0274	uridine-cytidine kinase 1-like 1	gga.13141	419255	UCKL1	BU215568	---	---	---
GgaAffx.26115.1.A1_at	7404.02	3649.04	-1.021	1.021	-2.029	PPP-PPP		2.3	1	0.0168	0.0168		0.0001	GgaAffx.26115.1.A1_at
Gga.7809.1.S1_at	466.3	230.09	-1.019	1.019	-2.027	PAP-AAA		1.2	10	0.0697	0.1207		0.0131	Finished cDNA, clone ChEST142c19	gga.7809	---	---	BU219698	---	---	---
GgaAffx.3729.3.S1_s_at	235.97	116.39	-1.02	1.02	-2.027	PMP-AAA		1.1	11	0.0812	0.1412		0.0234	GgaAffx.3729.3.S1_s_at
GgaAffx.8504.4.S1_at	72.03	35.75	-1.011	1.011	-2.015	PAA-AAA		1	12	0.0992	0.1959		0.0253	ATP-binding cassette, sub-family F (GCN20), member 2	gga.4872	426038	ABCF2	ENSGALT00000021789.1	6810 // transport // inferred from electronic annotation	---	166 // nucleotide binding // inferred from electronic annotation /// 5524 // ATP binding // inferred from electronic annotation /// 16887 // ATPase activity // inferred from electronic annotation /// 17111 // nucleoside-triphosphatase activity // inferred
GgaAffx.8765.2.S1_at	3832.8	1903.25	-1.01	1.01	-2.014	PPP-PPP		2.3	1	0.0168	0.0168		0.0004	similar to Glutamine:fructose-6-phosphate amidotransferase 2	---	416372	LOC416372	ENSGALT00000022352.1	---	---	---
GgaAffx.23381.4.S1_s_at	131.02	65.15	-1.008	1.008	-2.011	PPP-PPP		1.1	11	0.0812	0.1412		0.0213	GgaAffx.23381.4.S1_s_at
GgaAffx.13225.1.S1_at	312.04	155.15	-1.008	1.008	-2.011	PPP-PAA		0.8	14	0.155	0.3081		0.0465	GgaAffx.13225.1.S1_at
Gga.4675.1.S1_at	553.82	275.78	-1.006	1.006	-2.008	PPP-PPP		1.2	10	0.0697	0.1207		0.0153	syndecan 2 (heparan sulfate proteoglycan 1, cell surface-associated, fibroglycan)	gga.4675	374102	SDC2	AB105811.1	---	16020 // membrane // inferred from electronic annotation /// 16021 // integral to membrane // inferred from electronic annotation	8092 // cytoskeletal protein binding // inferred from electronic annotation
Gga.18069.1.S1_at	177.21	88.53	-1.001	1.001	-2.002	PAA-AAA		0.9	13	0.124	0.2488		0.043	Finished cDNA, clone ChEST866a14	gga.18069	---	---	CR389549.1	---	---	---
Gga.16486.1.S1_at	998.73	499.37	-1	1	-2	PPP-PPP		1.8	4	0.0277	0.0556		0.0028	Finished cDNA, clone ChEST130o11	gga.16486	---	---	AJ442369	---	---	---
Gga.209.2.S1_at	151.5	75.76	-1	1	-2	PAA-AAA		1.1	11	0.0812	0.1412		0.0224	wingless-type MMTV integration site family, member 3A	gga.209	395396	WNT3A	CR386781.1	7223 // frizzled-2 signaling pathway // inferred from electronic annotation /// 7275 // development // inferred from electronic annotation /// 16055 // Wnt receptor signaling pathway // inferred from electronic annotation	5576 // extracellular region // inferred from electronic annotation	4871 // signal transducer activity // inferred from electronic annotation
GgaAffx.23355.1.S1_at	190.8	95.62	-0.997	0.997	-1.995	PAP-AAA		0.8	14	0.155	0.3081		0.0496	GgaAffx.23355.1.S1_at

## Sheet: HH19-16 IGE
Name	Description HH19 to HH16 ingenuity pathway functional group-cellular movement	HUGO Gene Symbol	Fold Change	p-value	Networks	Location	Type
ACVR1	activin A receptor, type I	ACVR1	2.622	0.014	8	Plasma Membrane	kinase
ADCYAP1	adenylate cyclase activating polypeptide 1 (pituitary)	ADCYAP1	13	0.007	2	Extracellular Space	other
ALCAM	activated leukocyte cell adhesion molecule	ALCAM	6.01	0	2	Plasma Membrane	other
ANPEP	alanyl (membrane) aminopeptidase (aminopeptidase N, aminopeptidase M, microsomal aminopeptidase, CD13, p150)	ANPEP	-2.604	0.014	3,7	Plasma Membrane	peptidase
ASCL1	achaete-scute complex homolog 1 (Drosophila)	ASCL1	10.58	0	1	Nucleus	transcription regulator
CALD1	caldesmon 1	CALD1	2.564	0.001	1	Cytoplasm	other
CDH5	cadherin 5, type 2, VE-cadherin (vascular epithelium)	CDH5	-3.147	0.005	3	Plasma Membrane	other
CRMP1	collapsin response mediator protein 1	CRMP1	2.477	0.002	5	Cytoplasm	enzyme
DBN1	drebrin 1	DBN1	3.746	0.003	1,4	Cytoplasm	other
DPYSL3	dihydropyrimidinase-like 3	DPYSL3	2.019	0.001	5	Cytoplasm	enzyme
EBF1	early B-cell factor 1	EBF	3.542	0.012	7	Nucleus	transcription regulator
FABP5	fatty acid binding protein 5 (psoriasis-associated)	FABP5	2.013	0.006	1	Cytoplasm	transporter
FBLN1	fibulin 1	FBLN1	-2.047	0.003	4	Extracellular Space	other
FIGF	c-fos induced growth factor (vascular endothelial growth factor D)	FIGF	3.839	0	3	Extracellular Space	growth factor
FST	follistatin	FST	-3.236	0.016	1,8	Extracellular Space	other
GFRA1	GDNF family receptor alpha 1	GFRA1	3.201	0.011	5	Plasma Membrane	transmembrane receptor
GUCY1A3	guanylate cyclase 1, soluble, alpha 3	GUCY1A3	-2.447	0.042	4	Cytoplasm	enzyme
ID1	inhibitor of DNA binding 1, dominant negative helix-loop-helix protein	ID1	-2.611	0.008	2,4	Nucleus	transcription regulator
ID2	inhibitor of DNA binding 2, dominant negative helix-loop-helix protein	ID2	-2.044	0.014	2	Nucleus	transcription regulator
ISL1	ISL LIM homeobox 1	ISL1	10.292	0	1	Nucleus	transcription regulator
JUN	jun oncogene	JUN	2.152	0.006	2	Nucleus	transcription regulator
KIF5C	kinesin family member 5C	KIF5C	2.439	0.004	5	Cytoplasm	other
LGALS1	lectin, galactoside-binding, soluble, 1 (galectin 1)	LGALS1	2.355	0.031	1	Extracellular Space	other
LSP1	lymphocyte-specific protein 1	LSP1	2.122	0.007	1	Cytoplasm	other
MAP2	microtubule-associated protein 2	MAP2	2.388	0.003	1	Cytoplasm	other
MSX2	msh homeobox 2	MSX2	-2.711	0.008	2,4	Nucleus	transcription regulator
MYC	v-myc myelocytomatosis viral oncogene homolog (avian)	MYC	-2.402	0.001	2	Nucleus	transcription regulator
MYLK	myosin, light chain kinase	MYLK	-2.615	0.005	1	Cytoplasm	kinase
NEUROD1	neurogenic differentiation 1	NEUROD1	20.825	0	5	Nucleus	transcription regulator
NEUROG1	neurogenin 1	NEUROG1	4.949	0	3	Nucleus	transcription regulator
NRXN1	neurexin 1	NRXN1	2.107	0.009	1	Plasma Membrane	transporter
PAX6	paired box 6	PAX6	-4.03	0.015	5	Nucleus	transcription regulator
PENK	proenkephalin	PENK	4.858	0	3,7	Extracellular Space	other
PROX1	prospero homeobox 1	PROX1	3.557	0.001	1	Nucleus	transcription regulator
PTN	pleiotrophin (heparin binding growth factor 8, neurite growth-promoting factor 1)	PTN	-2.619	0	2	Extracellular Space	growth factor
PTPRZ1	protein tyrosine phosphatase, receptor-type, Z polypeptide 1	PTPRZ1	-3.163	0.033	2	Plasma Membrane	phosphatase
RGS3	regulator of G-protein signaling 3	RGS3	4.235	0	1	Nucleus	other
SDC2	syndecan 2	SDC2	-2.008	0.015	3	Plasma Membrane	other
SOCS2	suppressor of cytokine signaling 2	SOCS2	-3.817	0.001	3	Cytoplasm	other
SOX1	SRY (sex determining region Y)-box 1	SOX1	-2.384	0.04	3	Nucleus	transcription regulator
SST	somatostatin	SST	3.27	0.016	3	Extracellular Space	other
TFPI2	tissue factor pathway inhibitor 2	TFPI2	-2.699	0.006	1	Extracellular Space	other
TLX3	T-cell leukemia homeobox 3	TLX3	9.491	0		Nucleus	transcription regulator
UNC5C	unc-5 homolog C (C. elegans)	UNC5C	-2.266	0	6	Plasma Membrane	transmembrane receptor
VSNL1	visinin-like 1	VSNL1	2.64	0.031	1	Cytoplasm	other
WNT3A	wingless-type MMTV integration site family, member 3A	WNT3A	-2	0.022	2	Extracellular Space	other

## Sheet: HH19-16 IGE groups
Functional group identified in the St19 to St16 differential genes by Ingenuity pathway	Subfuntion	P value	Molecule	Count
Cellular Development	differentiation of cells	7.49e-09	ACVR1, ADCYAP1, AHR, ALDH1A2, ASCL1, CDH5, CDK6, CYP26A1, DDX4, EBF1, EYA2, FABP5, FAM20C, FGFR2, FIGF, FST, GFRA1, ID1, ID2, JUN, LGALS1, MBP, MSX2, MYC, NEUROD1, NEUROG1, OSTM1 (includes EG:28962), PAX6, PROX1, PTPRZ1, RARB, RUNX1T1, SOCS2, SOX1, SOX3, STMN2, TLX3, UGT8, VSX1, WNT3A	40
Cellular Development	cell movement	2.66e-06	ACVR1, ADCYAP1, ALCAM, ANPEP, ASCL1, CALD1, CDH5, DBN1, EBF1, FIGF, GFRA1, GUCY1A3, ID1, ID2, ISL1, JUN, LGALS1, LSP1, MAP2, MSX2, MYC, MYLK, NEUROD1, NEUROG1, PAX6, PENK, PROX1, PTN, PTPRZ1, RGS3, SDC2, SOCS2, SOX1, SST, TLX3, UNC5C, VSNL1, WNT3A	38
Cellular Development	migration of eukaryotic cells	5.22e-07	ACVR1, ADCYAP1, ALCAM, ANPEP, ASCL1, CDH5, EBF1, FIGF, GUCY1A3, ID1, ISL1, LGALS1, LSP1, MAP2, MSX2, MYC, MYLK, NEUROD1, NEUROG1, PAX6, PENK, PROX1, PTN, PTPRZ1, RGS3, SDC2, SOX1, SST, TLX3, VSNL1, WNT3A	31
Cellular Development	development of nervous system	2.31e-08	ALDH1A2, C7ORF16, CITED2, CYP26A1, GFRA1, MBP, MYC, NFIB, NHLH1, PAX6, PTPRZ1, SOX1, SOX3, TAGLN3, TLX3, UGT8, UNC5C, ZIC3	18
Cellular Development	neurogenesis	0.000573	ASCL1, CRMP1, DPYSL3, DVL1, GAL, GFRA1, ID1, MAP2, NDP, NEUROD1, NEUROG1, PAX6, PHOX2B, PTN	14
Cellular Development	developmental process of neurons	2.8e-05	ADCYAP1, ALDH1A2, ASCL1, GFRA1, MYC, NEUROD1, NEUROG1, PAX6, PTN, PTPRZ1, SOCS2, TLX3, VSX1	13
Cellular Development	invasion of cells	0.00162	ANPEP, CRMP1, FABP5, FBLN1, FST, ID1, ID2, JUN, MYLK, SDC2, SST, TFPI2, UNC5C	13
Cellular Development	growth of neurites	0.000143	ADCYAP1, DVL1, ELAVL4, GAL, GFRA1, JUN, MAP2, PTPRZ1, SOCS2, SST, STMN2, WNT3A	12
Cellular Development	cell movement of neurons	1.62e-07	ADCYAP1, ASCL1, EBF1, GFRA1, MAP2, PAX6, PTN, PTPRZ1, RGS3, SOX1, SST, TLX3	12
Cellular Development	differentiation of neurons	2.46e-05	ALDH1A2, ASCL1, GFRA1, MYC, NEUROD1, NEUROG1, PAX6, PTPRZ1, SOCS2, TLX3, VSX1	11
Cellular Development	differentiation of neurons	2.46e-05	ALDH1A2, ASCL1, GFRA1, MYC, NEUROD1, NEUROG1, PAX6, PTPRZ1, SOCS2, TLX3, VSX1	11
Cellular Development	outgrowth of neurites	0.000859	DVL1, ELAVL4, GAL, JUN, MAP2, PTPRZ1, SOCS2, SST, STMN2, WNT3A	10
Cellular Development	migration of neurons	5.99e-06	ADCYAP1, ASCL1, EBF1, MAP2, PAX6, PTN, PTPRZ1, SOX1, SST, TLX3	10
Nervous System Development and Function	developmental process of embryonic cells	7.68e-05	ACVR1, ALDH1A2, CYP26A1, EYA2, FGFR2, ID1, JUN, MYC, PAX6	9
Nervous System Development and Function	migration of tumor cell lines	0.00765	ALCAM, ANPEP, FIGF, PTN, PTPRZ1, RGS3, SDC2, SST, VSNL1	9
Nervous System Development and Function	developmental process of embryonic cells	7.68e-05	ACVR1, ALDH1A2, CYP26A1, EYA2, FGFR2, ID1, JUN, MYC, PAX6	9
Nervous System Development and Function	developmental process of embryo	0.00346	ACVR1, ALDH1A2, FGFR2, JUN, MSX2, NEUROD1, NKX3-2, PAX6, WNT3A	9
Nervous System Development and Function	development of embryo	0.00318	ACVR1, ALDH1A2, FGFR2, JUN, MSX2, NEUROD1, NKX3-2, PAX6, WNT3A	9
Nervous System Development and Function	developmental process of stem cells	0.000325	ASCL1, ID1, ID2, JUN, MYC, NEUROD1, NEUROG1, PAX6	8
Nervous System Development and Function	commitment of cells	2.92e-05	ASCL1, EYA2, FGFR2, NEUROD1, NEUROG1, PAX6, PROX1, TLX3	8
Nervous System Development and Function	development of neurites	0.000799	ASCL1, DPYSL3, DVL1, MAP2, MBP, PAX6, PTPRZ1, WNT3A	8
Nervous System Development and Function	neurological process of cells	0.00185	ADCYAP1, ASCL1, FGFR2, GAL, ID1, NEUROG1, PAX6, PTN	8
Nervous System Development and Function	neurological process of axons	0.000491	ALCAM, DPYSL3, KIF5C, MBP, NRXN1, PAX6, UNC5C	7
Nervous System Development and Function	neurological process of neurites	0.000491	ALCAM, DPYSL3, KIF5C, MBP, NRXN1, PAX6, UNC5C	7
Nervous System Development and Function	differentiation of stem cells	0.000944	ASCL1, ID2, JUN, MYC, NEUROD1, NEUROG1	6
Nervous System Development and Function	development of neurons	0.00058	ADCYAP1, ASCL1, NEUROD1, PAX6, PTN, TLX3	6
Nervous System Development and Function	development of neurons	0.00058	ADCYAP1, ASCL1, NEUROD1, PAX6, PTN, TLX3	6
Nervous System Development and Function	guidance of axons	0.00125	ALCAM, DPYSL3, KIF5C, NRXN1, PAX6, UNC5C	6
Cellular Movement	guidance of axons	0.00125	ALCAM, DPYSL3, KIF5C, NRXN1, PAX6, UNC5C	6
Cellular Movement	development of rhombencephalon	2.84e-06	ALDH1A2, CYP26A1, NEUROD1, NFIB, PAX6	5
Cellular Movement	development of forebrain	0.0011	ALDH1A2, NFIB, PAX6, SOX1, SOX3	5
Cellular Movement	development of axons	0.00529	ASCL1, MBP, PAX6, PTPRZ1, WNT3A	5
Cellular Movement	proliferation of neurons	0.000884	ADCYAP1, ID1, ISL1, PAX6, WNT3A	5
Cellular Movement	cell movement of brain cells	0.000255	ADCYAP1, PTN, PTPRZ1, RGS3, SST	5
Cellular Movement	cell movement of central nervous system cells	0.000592	ADCYAP1, PTN, PTPRZ1, RGS3, SST	5
Cellular Movement	differentiation of neuroglia	0.00969	ASCL1, ID2, NEUROG1, UGT8	4
Cellular Movement	developmental process of neural crest cells	0.000945	ACVR1, ALDH1A2, CYP26A1	3
Cellular Movement	neuritogenesis of cells	0.004	ADCYAP1, FGFR2, PTN	3
Cellular Movement	specification of cells	0.00548	EYA2, PAX6, TLX3	3
Cellular Movement	migration of neural stem cells	0.000102	ASCL1, NEUROD1, NEUROG1	3
Embryonic Development	developmental process of neural crest cells	0.000945	ACVR1, ALDH1A2, CYP26A1	3
Embryonic Development	development of neural crest cells	0.00525	ALDH1A2, CYP26A1	2
Embryonic Development	guidance of motor axons	0.00412	ALCAM, KIF5C	2
Embryonic Development	chemotaxis of neurons	0.011	GFRA1, RGS3	2
Embryonic Development	development of neural crest cells	0.00525	ALDH1A2, CYP26A1	2
